# Supplementary material for: The RIPper, a web-based tool for genome-wide quantification of Repeat-Induced Point (RIP) mutations
Source: PeerJ. 2019 Aug 26;7:e7447. doi: 10.7717/peerj.7447 (PMC6714961; doi:10.7717/peerj.7447)
Supplement: Table S1 — Example of results using the RIP Genome tool of The RIPper for the genome-wide RIP analyses of the Neurospora crassa (Strain:OR74a; assembly number: GCA_000182925.2; accessed through the National Centre for Biotechnology Information (NCBI; https://www.ncbi.nlm.nih.gov)) genome assembly. The results also includes the average GC content calculated per window. RIP product index values above 1.1, RIP substrate index values below 0.9, and RIP composite index values above 0 indicate RIP affected windows (Selker, 1990; Selker et al., 2003; Lewis et al., 2009; Margolin et al., 1998). [file peerj-07-7447-s002.xlsx]

## Sheet: Table S1
Table S1: Genome-wide RIP index values of Neurospora crassa.
Example of results using the RIP Genome tool of The RIPper for the genome-wide RIP analyses of the Neurospora crassa (Strain:OR74a; assembly number: GCA_000182925.2; accessed through the National Centre for Biotechnology Information [NCBI; https://www.ncbi.nlm.nih.gov]) genome assembly. The results also includes the average GC content calculated per window. RIP product index values above 1.1, RIP…
Scaffold Name	Start (bp)	End (bp)	RIP product index value1	RIP substrate index value2	RIP composite index value3	GC content (%)
NC_026501.1 Neurospora crassa OR74A linkage group I, whole genome shotgun sequence	0	1000	1.89	0.47	1.42	3.3
NC_026501.1 Neurospora crassa OR74A linkage group I, whole genome shotgun sequence	500	1500	1.31	0.81	0.51	19.6
NC_026501.1 Neurospora crassa OR74A linkage group I, whole genome shotgun sequence	1000	2000	1	1	0	48.3
NC_026501.1 Neurospora crassa OR74A linkage group I, whole genome shotgun sequence	1500	2500	0.44	1.29	-0.85	53.2
NC_026501.1 Neurospora crassa OR74A linkage group I, whole genome shotgun sequence	2000	3000	0.44	1.31	-0.88	45.3
NC_026501.1 Neurospora crassa OR74A linkage group I, whole genome shotgun sequence	2500	3500	0.58	1.18	-0.59	46.5
NC_026501.1 Neurospora crassa OR74A linkage group I, whole genome shotgun sequence	3000	4000	0.67	1.18	-0.51	52.2
NC_026501.1 Neurospora crassa OR74A linkage group I, whole genome shotgun sequence	3500	4500	0.93	0.91	0.02	53.2
NC_026501.1 Neurospora crassa OR74A linkage group I, whole genome shotgun sequence	4000	5000	0.81	0.85	-0.04	48.5
NC_026501.1 Neurospora crassa OR74A linkage group I, whole genome shotgun sequence	4500	5500	0.63	1.07	-0.44	48.8
NC_026501.1 Neurospora crassa OR74A linkage group I, whole genome shotgun sequence	5000	6000	0.54	1.26	-0.72	50.8
NC_026501.1 Neurospora crassa OR74A linkage group I, whole genome shotgun sequence	5500	6500	0.6	1.27	-0.67	51.2
NC_026501.1 Neurospora crassa OR74A linkage group I, whole genome shotgun sequence	6000	7000	0.78	1.16	-0.39	49.6
NC_026501.1 Neurospora crassa OR74A linkage group I, whole genome shotgun sequence	6500	7500	0.87	1.26	-0.39	44.1
NC_026501.1 Neurospora crassa OR74A linkage group I, whole genome shotgun sequence	7000	8000	1.15	1.07	0.08	38.2
NC_026501.1 Neurospora crassa OR74A linkage group I, whole genome shotgun sequence	7500	8500	1.04	1.03	0.01	37.2
NC_026501.1 Neurospora crassa OR74A linkage group I, whole genome shotgun sequence	8000	9000	0.69	1.27	-0.59	40.4
NC_026501.1 Neurospora crassa OR74A linkage group I, whole genome shotgun sequence	8500	9500	0.63	1.27	-0.64	41.4
NC_026501.1 Neurospora crassa OR74A linkage group I, whole genome shotgun sequence	9000	10000	0.76	1.02	-0.26	47.7
NC_026501.1 Neurospora crassa OR74A linkage group I, whole genome shotgun sequence	9500	10500	0.6	1.21	-0.61	56.5
NC_026501.1 Neurospora crassa OR74A linkage group I, whole genome shotgun sequence	10000	11000	0.47	1.25	-0.78	57.3
NC_026501.1 Neurospora crassa OR74A linkage group I, whole genome shotgun sequence	10500	11500	0.6	1.09	-0.49	57
NC_026501.1 Neurospora crassa OR74A linkage group I, whole genome shotgun sequence	11000	12000	0.64	1.13	-0.49	57.4
NC_026501.1 Neurospora crassa OR74A linkage group I, whole genome shotgun sequence	11500	12500	0.62	1.07	-0.45	57.1
NC_026501.1 Neurospora crassa OR74A linkage group I, whole genome shotgun sequence	12000	13000	0.42	1.24	-0.82	53
NC_026501.1 Neurospora crassa OR74A linkage group I, whole genome shotgun sequence	12500	13500	0.61	1.35	-0.74	45.6
NC_026501.1 Neurospora crassa OR74A linkage group I, whole genome shotgun sequence	13000	14000	0.82	1.2	-0.38	43.2
NC_026501.1 Neurospora crassa OR74A linkage group I, whole genome shotgun sequence	13500	14500	0.82	1.14	-0.32	44
NC_026501.1 Neurospora crassa OR74A linkage group I, whole genome shotgun sequence	14000	15000	0.67	1.18	-0.5	41.3
NC_026501.1 Neurospora crassa OR74A linkage group I, whole genome shotgun sequence	14500	15500	0.59	1.33	-0.75	42.4
NC_026501.1 Neurospora crassa OR74A linkage group I, whole genome shotgun sequence	15000	16000	0.71	1.22	-0.51	48
NC_026501.1 Neurospora crassa OR74A linkage group I, whole genome shotgun sequence	15500	16500	0.82	1.07	-0.24	52.2
NC_026501.1 Neurospora crassa OR74A linkage group I, whole genome shotgun sequence	16000	17000	0.71	1.15	-0.44	52.3
NC_026501.1 Neurospora crassa OR74A linkage group I, whole genome shotgun sequence	16500	17500	0.8	1.15	-0.35	49.3
NC_026501.1 Neurospora crassa OR74A linkage group I, whole genome shotgun sequence	17000	18000	0.75	1.13	-0.38	49.4
NC_026501.1 Neurospora crassa OR74A linkage group I, whole genome shotgun sequence	17500	18500	0.55	1.25	-0.7	50.9
NC_026501.1 Neurospora crassa OR74A linkage group I, whole genome shotgun sequence	18000	19000	0.57	1.14	-0.57	52.2
NC_026501.1 Neurospora crassa OR74A linkage group I, whole genome shotgun sequence	18500	19500	0.62	1.09	-0.47	51.3
NC_026501.1 Neurospora crassa OR74A linkage group I, whole genome shotgun sequence	19000	20000	0.64	1.16	-0.52	47.9
NC_026501.1 Neurospora crassa OR74A linkage group I, whole genome shotgun sequence	19500	20500	0.71	1.06	-0.35	49.6
NC_026501.1 Neurospora crassa OR74A linkage group I, whole genome shotgun sequence	20000	21000	0.6	1.17	-0.57	49
NC_026501.1 Neurospora crassa OR74A linkage group I, whole genome shotgun sequence	20500	21500	0.61	1.37	-0.76	33.7
NC_026501.1 Neurospora crassa OR74A linkage group I, whole genome shotgun sequence	21000	22000	1.33	0.84	0.49	23.7
NC_026501.1 Neurospora crassa OR74A linkage group I, whole genome shotgun sequence	21500	22500	1.38	0.49	0.89	30.4
NC_026501.1 Neurospora crassa OR74A linkage group I, whole genome shotgun sequence	22000	23000	1.4	0.39	1.01	31.1
NC_026501.1 Neurospora crassa OR74A linkage group I, whole genome shotgun sequence	22500	23500	2	0.27	1.73	22.3
NC_026501.1 Neurospora crassa OR74A linkage group I, whole genome shotgun sequence	23000	24000	1.83	0.34	1.49	17.4
NC_026501.1 Neurospora crassa OR74A linkage group I, whole genome shotgun sequence	23500	24500	1.66	0.32	1.34	19.8
NC_026501.1 Neurospora crassa OR74A linkage group I, whole genome shotgun sequence	24000	25000	1.82	0.31	1.52	17.2
NC_026501.1 Neurospora crassa OR74A linkage group I, whole genome shotgun sequence	24500	25500	2	0.49	1.51	15.7
NC_026501.1 Neurospora crassa OR74A linkage group I, whole genome shotgun sequence	25000	26000	1.59	0.41	1.18	17.2
NC_026501.1 Neurospora crassa OR74A linkage group I, whole genome shotgun sequence	25500	26500	1.68	0.25	1.43	16.5
NC_026501.1 Neurospora crassa OR74A linkage group I, whole genome shotgun sequence	26000	27000	1.79	0.32	1.47	17.3
NC_026501.1 Neurospora crassa OR74A linkage group I, whole genome shotgun sequence	26500	27500	1.62	0.35	1.27	14.7
NC_026501.1 Neurospora crassa OR74A linkage group I, whole genome shotgun sequence	27000	28000	1.74	0.4	1.34	16.9
NC_026501.1 Neurospora crassa OR74A linkage group I, whole genome shotgun sequence	27500	28500	1.67	0.5	1.17	18.7
NC_026501.1 Neurospora crassa OR74A linkage group I, whole genome shotgun sequence	28000	29000	1.36	0.56	0.79	14.9
NC_026501.1 Neurospora crassa OR74A linkage group I, whole genome shotgun sequence	28500	29500	1.4	0.58	0.81	18.6
NC_026501.1 Neurospora crassa OR74A linkage group I, whole genome shotgun sequence	29000	30000	1.59	0.48	1.11	25.2
NC_026501.1 Neurospora crassa OR74A linkage group I, whole genome shotgun sequence	29500	30500	1.62	0.39	1.22	21.4
NC_026501.1 Neurospora crassa OR74A linkage group I, whole genome shotgun sequence	30000	31000	1.67	0.35	1.32	13.4
NC_026501.1 Neurospora crassa OR74A linkage group I, whole genome shotgun sequence	30500	31500	1.96	0.4	1.56	12.4
NC_026501.1 Neurospora crassa OR74A linkage group I, whole genome shotgun sequence	31000	32000	2.35	0.36	1.98	18.3
NC_026501.1 Neurospora crassa OR74A linkage group I, whole genome shotgun sequence	31500	32500	2.27	0.26	2.01	14.9
NC_026501.1 Neurospora crassa OR74A linkage group I, whole genome shotgun sequence	32000	33000	2.24	0.29	1.94	8.6
NC_026501.1 Neurospora crassa OR74A linkage group I, whole genome shotgun sequence	32500	33500	1.96	0.17	1.79	14.6
NC_026501.1 Neurospora crassa OR74A linkage group I, whole genome shotgun sequence	33000	34000	1.39	0.55	0.84	19.2
NC_026501.1 Neurospora crassa OR74A linkage group I, whole genome shotgun sequence	33500	34500	0.73	1.38	-0.66	31.9
NC_026501.1 Neurospora crassa OR74A linkage group I, whole genome shotgun sequence	34000	35000	0.64	1.38	-0.75	44.8
NC_026501.1 Neurospora crassa OR74A linkage group I, whole genome shotgun sequence	34500	35500	0.76	1.15	-0.39	47.4
NC_026501.1 Neurospora crassa OR74A linkage group I, whole genome shotgun sequence	35000	36000	0.72	1.18	-0.46	50.2
NC_026501.1 Neurospora crassa OR74A linkage group I, whole genome shotgun sequence	35500	36500	0.56	1.34	-0.78	51.4
NC_026501.1 Neurospora crassa OR74A linkage group I, whole genome shotgun sequence	36000	37000	0.49	1.32	-0.83	53.8
NC_026501.1 Neurospora crassa OR74A linkage group I, whole genome shotgun sequence	36500	37500	0.42	1.27	-0.85	54
NC_026501.1 Neurospora crassa OR74A linkage group I, whole genome shotgun sequence	37000	38000	0.47	1.11	-0.64	52.4
NC_026501.1 Neurospora crassa OR74A linkage group I, whole genome shotgun sequence	37500	38500	0.55	1.07	-0.52	52.1
NC_026501.1 Neurospora crassa OR74A linkage group I, whole genome shotgun sequence	38000	39000	0.52	1.29	-0.76	49.9
NC_026501.1 Neurospora crassa OR74A linkage group I, whole genome shotgun sequence	38500	39500	0.72	1.34	-0.62	46.9
NC_026501.1 Neurospora crassa OR74A linkage group I, whole genome shotgun sequence	39000	40000	0.94	1.19	-0.25	46.3
NC_026501.1 Neurospora crassa OR74A linkage group I, whole genome shotgun sequence	39500	40500	0.82	1.15	-0.33	45.9
NC_026501.1 Neurospora crassa OR74A linkage group I, whole genome shotgun sequence	40000	41000	0.78	1.06	-0.28	48.3
NC_026501.1 Neurospora crassa OR74A linkage group I, whole genome shotgun sequence	40500	41500	0.67	1.21	-0.53	48.3
NC_026501.1 Neurospora crassa OR74A linkage group I, whole genome shotgun sequence	41000	42000	0.56	1.39	-0.83	49.3
NC_026501.1 Neurospora crassa OR74A linkage group I, whole genome shotgun sequence	41500	42500	0.51	1.32	-0.81	53
NC_026501.1 Neurospora crassa OR74A linkage group I, whole genome shotgun sequence	42000	43000	0.44	1.25	-0.81	52.9
NC_026501.1 Neurospora crassa OR74A linkage group I, whole genome shotgun sequence	42500	43500	0.57	1.15	-0.58	48.8
NC_026501.1 Neurospora crassa OR74A linkage group I, whole genome shotgun sequence	43000	44000	0.54	1.36	-0.82	48.8
NC_026501.1 Neurospora crassa OR74A linkage group I, whole genome shotgun sequence	43500	44500	0.47	1.41	-0.94	52.1
NC_026501.1 Neurospora crassa OR74A linkage group I, whole genome shotgun sequence	44000	45000	0.55	1.31	-0.76	45.1
NC_026501.1 Neurospora crassa OR74A linkage group I, whole genome shotgun sequence	44500	45500	0.62	1.37	-0.75	41.5
NC_026501.1 Neurospora crassa OR74A linkage group I, whole genome shotgun sequence	45000	46000	0.6	1.34	-0.75	49.6
NC_026501.1 Neurospora crassa OR74A linkage group I, whole genome shotgun sequence	45500	46500	0.5	1.37	-0.87	54.3
NC_026501.1 Neurospora crassa OR74A linkage group I, whole genome shotgun sequence	46000	47000	0.56	1.21	-0.65	54.7
NC_026501.1 Neurospora crassa OR74A linkage group I, whole genome shotgun sequence	46500	47500	0.63	1.08	-0.45	55
NC_026501.1 Neurospora crassa OR74A linkage group I, whole genome shotgun sequence	47000	48000	0.67	1.16	-0.49	51.2
NC_026501.1 Neurospora crassa OR74A linkage group I, whole genome shotgun sequence	47500	48500	0.73	1.07	-0.34	49.4
NC_026501.1 Neurospora crassa OR74A linkage group I, whole genome shotgun sequence	48000	49000	0.59	1.17	-0.58	49.4
NC_026501.1 Neurospora crassa OR74A linkage group I, whole genome shotgun sequence	48500	49500	0.45	1.43	-0.98	48.8
NC_026501.1 Neurospora crassa OR74A linkage group I, whole genome shotgun sequence	49000	50000	0.49	1.25	-0.76	51.8
NC_026501.1 Neurospora crassa OR74A linkage group I, whole genome shotgun sequence	49500	50500	0.62	1.08	-0.46	55.3
NC_026501.1 Neurospora crassa OR74A linkage group I, whole genome shotgun sequence	50000	51000	0.53	1.1	-0.57	54.7
NC_026501.1 Neurospora crassa OR74A linkage group I, whole genome shotgun sequence	50500	51500	0.39	1.23	-0.84	50.4
NC_026501.1 Neurospora crassa OR74A linkage group I, whole genome shotgun sequence	51000	52000	0.38	1.35	-0.97	51.5
NC_026501.1 Neurospora crassa OR74A linkage group I, whole genome shotgun sequence	51500	52500	0.48	1.35	-0.87	55.8
NC_026501.1 Neurospora crassa OR74A linkage group I, whole genome shotgun sequence	52000	53000	0.5	1.42	-0.92	53
NC_026501.1 Neurospora crassa OR74A linkage group I, whole genome shotgun sequence	52500	53500	0.69	1.23	-0.54	48.5
NC_026501.1 Neurospora crassa OR74A linkage group I, whole genome shotgun sequence	53000	54000	0.6	1.13	-0.53	49.8
NC_026501.1 Neurospora crassa OR74A linkage group I, whole genome shotgun sequence	53500	54500	0.49	1.3	-0.81	52.9
NC_026501.1 Neurospora crassa OR74A linkage group I, whole genome shotgun sequence	54000	55000	0.45	1.41	-0.96	49
NC_026501.1 Neurospora crassa OR74A linkage group I, whole genome shotgun sequence	54500	55500	0.51	1.03	-0.52	46.9
NC_026501.1 Neurospora crassa OR74A linkage group I, whole genome shotgun sequence	55000	56000	0.56	1.01	-0.45	51.5
NC_026501.1 Neurospora crassa OR74A linkage group I, whole genome shotgun sequence	55500	56500	0.52	1.25	-0.73	53.8
NC_026501.1 Neurospora crassa OR74A linkage group I, whole genome shotgun sequence	56000	57000	0.72	1.29	-0.58	53.7
NC_026501.1 Neurospora crassa OR74A linkage group I, whole genome shotgun sequence	56500	57500	0.63	1.4	-0.76	51
NC_026501.1 Neurospora crassa OR74A linkage group I, whole genome shotgun sequence	57000	58000	0.6	1.4	-0.8	48
NC_026501.1 Neurospora crassa OR74A linkage group I, whole genome shotgun sequence	57500	58500	0.52	1.41	-0.89	48.2
NC_026501.1 Neurospora crassa OR74A linkage group I, whole genome shotgun sequence	58000	59000	0.54	1.37	-0.83	44.7
NC_026501.1 Neurospora crassa OR74A linkage group I, whole genome shotgun sequence	58500	59500	0.81	1.15	-0.34	44.9
NC_026501.1 Neurospora crassa OR74A linkage group I, whole genome shotgun sequence	59000	60000	0.61	0.97	-0.37	53.1
NC_026501.1 Neurospora crassa OR74A linkage group I, whole genome shotgun sequence	59500	60500	0.59	0.93	-0.34	58.4
NC_026501.1 Neurospora crassa OR74A linkage group I, whole genome shotgun sequence	60000	61000	0.84	1	-0.16	52.6
NC_026501.1 Neurospora crassa OR74A linkage group I, whole genome shotgun sequence	60500	61500	0.83	1.13	-0.29	46.5
NC_026501.1 Neurospora crassa OR74A linkage group I, whole genome shotgun sequence	61000	62000	0.67	1.29	-0.62	48.6
NC_026501.1 Neurospora crassa OR74A linkage group I, whole genome shotgun sequence	61500	62500	0.5	1.31	-0.81	53.2
NC_026501.1 Neurospora crassa OR74A linkage group I, whole genome shotgun sequence	62000	63000	0.69	1.18	-0.5	52.8
NC_026501.1 Neurospora crassa OR74A linkage group I, whole genome shotgun sequence	62500	63500	1.3	0.89	0.41	36.7
NC_026501.1 Neurospora crassa OR74A linkage group I, whole genome shotgun sequence	63000	64000	1.46	0.57	0.89	26.8
NC_026501.1 Neurospora crassa OR74A linkage group I, whole genome shotgun sequence	63500	64500	1.36	0.69	0.67	25.8
NC_026501.1 Neurospora crassa OR74A linkage group I, whole genome shotgun sequence	64000	65000	1.39	0.67	0.72	20
NC_026501.1 Neurospora crassa OR74A linkage group I, whole genome shotgun sequence	64500	65500	1.52	0.51	1.01	15.5
NC_026501.1 Neurospora crassa OR74A linkage group I, whole genome shotgun sequence	65000	66000	1.61	0.36	1.25	12
NC_026501.1 Neurospora crassa OR74A linkage group I, whole genome shotgun sequence	65500	66500	1.63	0.39	1.24	15
NC_026501.1 Neurospora crassa OR74A linkage group I, whole genome shotgun sequence	66000	67000	1.66	0.4	1.25	15.3
NC_026501.1 Neurospora crassa OR74A linkage group I, whole genome shotgun sequence	66500	67500	1.72	0.41	1.31	11.6
NC_026501.1 Neurospora crassa OR74A linkage group I, whole genome shotgun sequence	67000	68000	1.75	0.42	1.33	12.6
NC_026501.1 Neurospora crassa OR74A linkage group I, whole genome shotgun sequence	67500	68500	1.63	0.4	1.23	11
NC_026501.1 Neurospora crassa OR74A linkage group I, whole genome shotgun sequence	68000	69000	1.32	0.62	0.69	9.4
NC_026501.1 Neurospora crassa OR74A linkage group I, whole genome shotgun sequence	68500	69500	1.42	0.48	0.94	10.7
NC_026501.1 Neurospora crassa OR74A linkage group I, whole genome shotgun sequence	69000	70000	1.61	0.32	1.29	12.4
NC_026501.1 Neurospora crassa OR74A linkage group I, whole genome shotgun sequence	69500	70500	1.62	0.33	1.29	12.6
NC_026501.1 Neurospora crassa OR74A linkage group I, whole genome shotgun sequence	70000	71000	1.7	0.25	1.45	13.3
NC_026501.1 Neurospora crassa OR74A linkage group I, whole genome shotgun sequence	70500	71500	1.49	0.3	1.19	15.6
NC_026501.1 Neurospora crassa OR74A linkage group I, whole genome shotgun sequence	71000	72000	1.43	0.35	1.09	16.1
NC_026501.1 Neurospora crassa OR74A linkage group I, whole genome shotgun sequence	71500	72500	1.24	0.64	0.59	16.9
NC_026501.1 Neurospora crassa OR74A linkage group I, whole genome shotgun sequence	72000	73000	1.21	0.72	0.48	15.2
NC_026501.1 Neurospora crassa OR74A linkage group I, whole genome shotgun sequence	72500	73500	2.11	0.41	1.7	6.6
NC_026501.1 Neurospora crassa OR74A linkage group I, whole genome shotgun sequence	73000	74000	1.57	0.44	1.13	1.6
NC_026501.1 Neurospora crassa OR74A linkage group I, whole genome shotgun sequence	73500	74500	1.32	0.59	0.72	12.3
NC_026501.1 Neurospora crassa OR74A linkage group I, whole genome shotgun sequence	74000	75000	1.55	0.44	1.11	17.8
NC_026501.1 Neurospora crassa OR74A linkage group I, whole genome shotgun sequence	74500	75500	1.63	0.35	1.29	16.9
NC_026501.1 Neurospora crassa OR74A linkage group I, whole genome shotgun sequence	75000	76000	1.36	0.33	1.03	17
NC_026501.1 Neurospora crassa OR74A linkage group I, whole genome shotgun sequence	75500	76500	1.3	0.28	1.03	13.1
NC_026501.1 Neurospora crassa OR74A linkage group I, whole genome shotgun sequence	76000	77000	1.53	0.65	0.88	18.1
NC_026501.1 Neurospora crassa OR74A linkage group I, whole genome shotgun sequence	76500	77500	1.7	0.76	0.95	21.6
NC_026501.1 Neurospora crassa OR74A linkage group I, whole genome shotgun sequence	77000	78000	1.69	0.52	1.16	18.7
NC_026501.1 Neurospora crassa OR74A linkage group I, whole genome shotgun sequence	77500	78500	1.8	0.14	1.66	12.8
NC_026501.1 Neurospora crassa OR74A linkage group I, whole genome shotgun sequence	78000	79000	1.35	0.26	1.09	10.3
NC_026501.1 Neurospora crassa OR74A linkage group I, whole genome shotgun sequence	78500	79500	1.61	0.35	1.26	18.1
NC_026501.1 Neurospora crassa OR74A linkage group I, whole genome shotgun sequence	79000	80000	1.72	0.46	1.26	16.2
NC_026501.1 Neurospora crassa OR74A linkage group I, whole genome shotgun sequence	79500	80500	1.18	0.6	0.58	8.9
NC_026501.1 Neurospora crassa OR74A linkage group I, whole genome shotgun sequence	80000	81000	1.28	0.36	0.92	11.3
NC_026501.1 Neurospora crassa OR74A linkage group I, whole genome shotgun sequence	80500	81500	1.4	0.31	1.09	13.7
NC_026501.1 Neurospora crassa OR74A linkage group I, whole genome shotgun sequence	81000	82000	1.66	0.29	1.37	16.1
NC_026501.1 Neurospora crassa OR74A linkage group I, whole genome shotgun sequence	81500	82500	1.54	0.31	1.23	16.6
NC_026501.1 Neurospora crassa OR74A linkage group I, whole genome shotgun sequence	82000	83000	1.5	0.42	1.08	16.2
NC_026501.1 Neurospora crassa OR74A linkage group I, whole genome shotgun sequence	82500	83500	1.68	0.38	1.3	15.6
NC_026501.1 Neurospora crassa OR74A linkage group I, whole genome shotgun sequence	83000	84000	1.59	0.26	1.33	12.2
NC_026501.1 Neurospora crassa OR74A linkage group I, whole genome shotgun sequence	83500	84500	1.88	0.14	1.74	9
NC_026501.1 Neurospora crassa OR74A linkage group I, whole genome shotgun sequence	84000	85000	1.88	0.22	1.65	15
NC_026501.1 Neurospora crassa OR74A linkage group I, whole genome shotgun sequence	84500	85500	1.71	0.46	1.25	27.2
NC_026501.1 Neurospora crassa OR74A linkage group I, whole genome shotgun sequence	85000	86000	1.5	0.55	0.95	23.2
NC_026501.1 Neurospora crassa OR74A linkage group I, whole genome shotgun sequence	85500	86500	1.42	0.52	0.9	16.3
NC_026501.1 Neurospora crassa OR74A linkage group I, whole genome shotgun sequence	86000	87000	1.4	0.65	0.75	11.5
NC_026501.1 Neurospora crassa OR74A linkage group I, whole genome shotgun sequence	86500	87500	1.17	0.89	0.28	3.7
NC_026501.1 Neurospora crassa OR74A linkage group I, whole genome shotgun sequence	87000	88000	1.57	0.41	1.16	5.5
NC_026501.1 Neurospora crassa OR74A linkage group I, whole genome shotgun sequence	87500	88500	1.8	0.29	1.51	13.1
NC_026501.1 Neurospora crassa OR74A linkage group I, whole genome shotgun sequence	88000	89000	1.47	0.6	0.87	19.9
NC_026501.1 Neurospora crassa OR74A linkage group I, whole genome shotgun sequence	88500	89500	0.85	1.09	-0.24	37.9
NC_026501.1 Neurospora crassa OR74A linkage group I, whole genome shotgun sequence	89000	90000	0.63	1.19	-0.56	51.4
NC_026501.1 Neurospora crassa OR74A linkage group I, whole genome shotgun sequence	89500	90500	0.75	1.16	-0.41	48.8
NC_026501.1 Neurospora crassa OR74A linkage group I, whole genome shotgun sequence	90000	91000	0.82	1.24	-0.42	49.6
NC_026501.1 Neurospora crassa OR74A linkage group I, whole genome shotgun sequence	90500	91500	0.66	1.36	-0.7	51.2
NC_026501.1 Neurospora crassa OR74A linkage group I, whole genome shotgun sequence	91000	92000	0.58	1.32	-0.74	50.4
NC_026501.1 Neurospora crassa OR74A linkage group I, whole genome shotgun sequence	91500	92500	0.72	1.24	-0.52	47.2
NC_026501.1 Neurospora crassa OR74A linkage group I, whole genome shotgun sequence	92000	93000	0.75	1.2	-0.45	44.3
NC_026501.1 Neurospora crassa OR74A linkage group I, whole genome shotgun sequence	92500	93500	0.61	1.42	-0.81	45.2
NC_026501.1 Neurospora crassa OR74A linkage group I, whole genome shotgun sequence	93000	94000	0.51	1.47	-0.96	46.5
NC_026501.1 Neurospora crassa OR74A linkage group I, whole genome shotgun sequence	93500	94500	0.56	1.28	-0.72	46.4
NC_026501.1 Neurospora crassa OR74A linkage group I, whole genome shotgun sequence	94000	95000	0.57	1.15	-0.59	51.4
NC_026501.1 Neurospora crassa OR74A linkage group I, whole genome shotgun sequence	94500	95500	0.66	1.13	-0.47	49.2
NC_026501.1 Neurospora crassa OR74A linkage group I, whole genome shotgun sequence	95000	96000	0.73	1.15	-0.42	43
NC_026501.1 Neurospora crassa OR74A linkage group I, whole genome shotgun sequence	95500	96500	0.55	1.26	-0.71	43.4
NC_026501.1 Neurospora crassa OR74A linkage group I, whole genome shotgun sequence	96000	97000	0.51	1.22	-0.71	48
NC_026501.1 Neurospora crassa OR74A linkage group I, whole genome shotgun sequence	96500	97500	0.59	1.18	-0.59	52.5
NC_026501.1 Neurospora crassa OR74A linkage group I, whole genome shotgun sequence	97000	98000	0.65	1.27	-0.62	49.8
NC_026501.1 Neurospora crassa OR74A linkage group I, whole genome shotgun sequence	97500	98500	0.73	1.27	-0.54	50.1
NC_026501.1 Neurospora crassa OR74A linkage group I, whole genome shotgun sequence	98000	99000	0.61	1.23	-0.62	51.2
NC_026501.1 Neurospora crassa OR74A linkage group I, whole genome shotgun sequence	98500	99500	0.53	1.08	-0.55	52.6
NC_026501.1 Neurospora crassa OR74A linkage group I, whole genome shotgun sequence	99000	100000	0.52	1.18	-0.66	51.9
NC_026501.1 Neurospora crassa OR74A linkage group I, whole genome shotgun sequence	99500	100500	0.33	1.45	-1.12	51.2
NC_026501.1 Neurospora crassa OR74A linkage group I, whole genome shotgun sequence	100000	101000	0.36	1.39	-1.02	52.7
NC_026501.1 Neurospora crassa OR74A linkage group I, whole genome shotgun sequence	100500	101500	0.59	1.06	-0.48	48.7
NC_026501.1 Neurospora crassa OR74A linkage group I, whole genome shotgun sequence	101000	102000	0.66	1.08	-0.42	47.3
NC_026501.1 Neurospora crassa OR74A linkage group I, whole genome shotgun sequence	101500	102500	0.66	1.12	-0.46	46.3
NC_026501.1 Neurospora crassa OR74A linkage group I, whole genome shotgun sequence	102000	103000	0.6	1.05	-0.45	47
NC_026501.1 Neurospora crassa OR74A linkage group I, whole genome shotgun sequence	102500	103500	0.68	1.09	-0.41	48.7
NC_026501.1 Neurospora crassa OR74A linkage group I, whole genome shotgun sequence	103000	104000	0.89	1.06	-0.17	48.1
NC_026501.1 Neurospora crassa OR74A linkage group I, whole genome shotgun sequence	103500	104500	0.72	1.11	-0.39	51.5
NC_026501.1 Neurospora crassa OR74A linkage group I, whole genome shotgun sequence	104000	105000	0.58	1.24	-0.66	55.1
NC_026501.1 Neurospora crassa OR74A linkage group I, whole genome shotgun sequence	104500	105500	0.54	1.34	-0.8	58.1
NC_026501.1 Neurospora crassa OR74A linkage group I, whole genome shotgun sequence	105000	106000	0.4	1.27	-0.87	57.4
NC_026501.1 Neurospora crassa OR74A linkage group I, whole genome shotgun sequence	105500	106500	0.48	1.18	-0.71	53.6
NC_026501.1 Neurospora crassa OR74A linkage group I, whole genome shotgun sequence	106000	107000	0.63	1.24	-0.61	49.4
NC_026501.1 Neurospora crassa OR74A linkage group I, whole genome shotgun sequence	106500	107500	0.64	1.22	-0.58	49
NC_026501.1 Neurospora crassa OR74A linkage group I, whole genome shotgun sequence	107000	108000	0.56	1.22	-0.66	50.5
NC_026501.1 Neurospora crassa OR74A linkage group I, whole genome shotgun sequence	107500	108500	0.58	1.27	-0.69	49
NC_026501.1 Neurospora crassa OR74A linkage group I, whole genome shotgun sequence	108000	109000	0.78	1.2	-0.42	48
NC_026501.1 Neurospora crassa OR74A linkage group I, whole genome shotgun sequence	108500	109500	0.94	1.15	-0.21	49
NC_026501.1 Neurospora crassa OR74A linkage group I, whole genome shotgun sequence	109000	110000	0.94	1.09	-0.15	46.8
NC_026501.1 Neurospora crassa OR74A linkage group I, whole genome shotgun sequence	109500	110500	0.6	1.21	-0.6	49.5
NC_026501.1 Neurospora crassa OR74A linkage group I, whole genome shotgun sequence	110000	111000	0.61	1.27	-0.66	52.5
NC_026501.1 Neurospora crassa OR74A linkage group I, whole genome shotgun sequence	110500	111500	0.74	1.22	-0.48	51.1
NC_026501.1 Neurospora crassa OR74A linkage group I, whole genome shotgun sequence	111000	112000	0.71	1.09	-0.38	50.3
NC_026501.1 Neurospora crassa OR74A linkage group I, whole genome shotgun sequence	111500	112500	0.89	1.07	-0.17	44.3
NC_026501.1 Neurospora crassa OR74A linkage group I, whole genome shotgun sequence	112000	113000	0.81	1.07	-0.26	47.3
NC_026501.1 Neurospora crassa OR74A linkage group I, whole genome shotgun sequence	112500	113500	0.76	0.86	-0.1	52.2
NC_026501.1 Neurospora crassa OR74A linkage group I, whole genome shotgun sequence	113000	114000	0.76	0.95	-0.19	50.3
NC_026501.1 Neurospora crassa OR74A linkage group I, whole genome shotgun sequence	113500	114500	0.73	1.14	-0.41	49.1
NC_026501.1 Neurospora crassa OR74A linkage group I, whole genome shotgun sequence	114000	115000	0.71	1.2	-0.49	53.5
NC_026501.1 Neurospora crassa OR74A linkage group I, whole genome shotgun sequence	114500	115500	0.48	1.41	-0.93	57.2
NC_026501.1 Neurospora crassa OR74A linkage group I, whole genome shotgun sequence	115000	116000	0.36	1.38	-1.03	55.8
NC_026501.1 Neurospora crassa OR74A linkage group I, whole genome shotgun sequence	115500	116500	0.53	1.05	-0.52	55.3
NC_026501.1 Neurospora crassa OR74A linkage group I, whole genome shotgun sequence	116000	117000	0.81	0.97	-0.15	55.1
NC_026501.1 Neurospora crassa OR74A linkage group I, whole genome shotgun sequence	116500	117500	0.83	1.09	-0.26	48.1
NC_026501.1 Neurospora crassa OR74A linkage group I, whole genome shotgun sequence	117000	118000	0.68	1.26	-0.58	42.8
NC_026501.1 Neurospora crassa OR74A linkage group I, whole genome shotgun sequence	117500	118500	0.48	1.22	-0.74	42.1
NC_026501.1 Neurospora crassa OR74A linkage group I, whole genome shotgun sequence	118000	119000	0.41	1.36	-0.95	45.4
NC_026501.1 Neurospora crassa OR74A linkage group I, whole genome shotgun sequence	118500	119500	0.42	1.55	-1.13	47.3
NC_026501.1 Neurospora crassa OR74A linkage group I, whole genome shotgun sequence	119000	120000	0.74	1.26	-0.52	45.4
NC_026501.1 Neurospora crassa OR74A linkage group I, whole genome shotgun sequence	119500	120500	0.89	1.14	-0.26	46.7
NC_026501.1 Neurospora crassa OR74A linkage group I, whole genome shotgun sequence	120000	121000	0.6	1.22	-0.62	47.9
NC_026501.1 Neurospora crassa OR74A linkage group I, whole genome shotgun sequence	120500	121500	0.53	1.28	-0.74	49.5
NC_026501.1 Neurospora crassa OR74A linkage group I, whole genome shotgun sequence	121000	122000	0.47	1.43	-0.96	47.6
NC_026501.1 Neurospora crassa OR74A linkage group I, whole genome shotgun sequence	121500	122500	0.5	1.47	-0.97	44.3
NC_026501.1 Neurospora crassa OR74A linkage group I, whole genome shotgun sequence	122000	123000	0.6	1.27	-0.67	45.3
NC_026501.1 Neurospora crassa OR74A linkage group I, whole genome shotgun sequence	122500	123500	0.49	1.26	-0.77	47.3
NC_026501.1 Neurospora crassa OR74A linkage group I, whole genome shotgun sequence	123000	124000	0.29	1.32	-1.03	54.1
NC_026501.1 Neurospora crassa OR74A linkage group I, whole genome shotgun sequence	123500	124500	0.57	1.08	-0.51	57.6
NC_026501.1 Neurospora crassa OR74A linkage group I, whole genome shotgun sequence	124000	125000	0.93	0.94	-0.01	55.1
NC_026501.1 Neurospora crassa OR74A linkage group I, whole genome shotgun sequence	124500	125500	0.87	1.04	-0.16	55.1
NC_026501.1 Neurospora crassa OR74A linkage group I, whole genome shotgun sequence	125000	126000	0.7	1.2	-0.5	53.9
NC_026501.1 Neurospora crassa OR74A linkage group I, whole genome shotgun sequence	125500	126500	0.44	1.3	-0.86	53.9
NC_026501.1 Neurospora crassa OR74A linkage group I, whole genome shotgun sequence	126000	127000	0.34	1.28	-0.94	56.6
NC_026501.1 Neurospora crassa OR74A linkage group I, whole genome shotgun sequence	126500	127500	0.45	1.3	-0.85	57.5
NC_026501.1 Neurospora crassa OR74A linkage group I, whole genome shotgun sequence	127000	128000	0.63	1.19	-0.56	52.3
NC_026501.1 Neurospora crassa OR74A linkage group I, whole genome shotgun sequence	127500	128500	0.75	1.05	-0.3	42.2
NC_026501.1 Neurospora crassa OR74A linkage group I, whole genome shotgun sequence	128000	129000	0.64	1.09	-0.45	42.3
NC_026501.1 Neurospora crassa OR74A linkage group I, whole genome shotgun sequence	128500	129500	0.46	1.15	-0.68	52.8
NC_026501.1 Neurospora crassa OR74A linkage group I, whole genome shotgun sequence	129000	130000	0.52	1.19	-0.67	50.3
NC_026501.1 Neurospora crassa OR74A linkage group I, whole genome shotgun sequence	129500	130500	0.71	1.17	-0.46	45.4
NC_026501.1 Neurospora crassa OR74A linkage group I, whole genome shotgun sequence	130000	131000	0.6	1.13	-0.53	51
NC_026501.1 Neurospora crassa OR74A linkage group I, whole genome shotgun sequence	130500	131500	0.34	1.08	-0.74	57.9
NC_026501.1 Neurospora crassa OR74A linkage group I, whole genome shotgun sequence	131000	132000	0.31	1.14	-0.83	57.4
NC_026501.1 Neurospora crassa OR74A linkage group I, whole genome shotgun sequence	131500	132500	0.47	1.19	-0.72	55.5
NC_026501.1 Neurospora crassa OR74A linkage group I, whole genome shotgun sequence	132000	133000	0.52	1.24	-0.72	53
NC_026501.1 Neurospora crassa OR74A linkage group I, whole genome shotgun sequence	132500	133500	0.44	1.3	-0.86	50.4
NC_026501.1 Neurospora crassa OR74A linkage group I, whole genome shotgun sequence	133000	134000	0.57	1.19	-0.62	50.4
NC_026501.1 Neurospora crassa OR74A linkage group I, whole genome shotgun sequence	133500	134500	0.81	1.07	-0.26	42.7
NC_026501.1 Neurospora crassa OR74A linkage group I, whole genome shotgun sequence	134000	135000	1.25	0.86	0.39	33.8
NC_026501.1 Neurospora crassa OR74A linkage group I, whole genome shotgun sequence	134500	135500	1.27	0.94	0.33	40.4
NC_026501.1 Neurospora crassa OR74A linkage group I, whole genome shotgun sequence	135000	136000	0.72	1.08	-0.35	55.1
NC_026501.1 Neurospora crassa OR74A linkage group I, whole genome shotgun sequence	135500	136500	0.34	1.21	-0.87	60.2
NC_026501.1 Neurospora crassa OR74A linkage group I, whole genome shotgun sequence	136000	137000	0.53	1.22	-0.69	50.6
NC_026501.1 Neurospora crassa OR74A linkage group I, whole genome shotgun sequence	136500	137500	0.59	1.08	-0.49	48.1
NC_026501.1 Neurospora crassa OR74A linkage group I, whole genome shotgun sequence	137000	138000	0.56	1.11	-0.55	51.1
NC_026501.1 Neurospora crassa OR74A linkage group I, whole genome shotgun sequence	137500	138500	0.59	1.12	-0.53	52.1
NC_026501.1 Neurospora crassa OR74A linkage group I, whole genome shotgun sequence	138000	139000	0.56	1.1	-0.55	59.4
NC_026501.1 Neurospora crassa OR74A linkage group I, whole genome shotgun sequence	138500	139500	0.5	1.06	-0.56	62.6
NC_026501.1 Neurospora crassa OR74A linkage group I, whole genome shotgun sequence	139000	140000	0.69	1.12	-0.43	53.9
NC_026501.1 Neurospora crassa OR74A linkage group I, whole genome shotgun sequence	139500	140500	0.68	1.3	-0.62	46.8
NC_026501.1 Neurospora crassa OR74A linkage group I, whole genome shotgun sequence	140000	141000	0.54	1.2	-0.66	46.1
NC_026501.1 Neurospora crassa OR74A linkage group I, whole genome shotgun sequence	140500	141500	0.56	1.17	-0.61	49.6
NC_026501.1 Neurospora crassa OR74A linkage group I, whole genome shotgun sequence	141000	142000	0.47	1.55	-1.08	52.8
NC_026501.1 Neurospora crassa OR74A linkage group I, whole genome shotgun sequence	141500	142500	0.52	1.4	-0.87	52.1
NC_026501.1 Neurospora crassa OR74A linkage group I, whole genome shotgun sequence	142000	143000	0.62	1.12	-0.5	49.1
NC_026501.1 Neurospora crassa OR74A linkage group I, whole genome shotgun sequence	142500	143500	0.69	1.04	-0.35	45.8
NC_026501.1 Neurospora crassa OR74A linkage group I, whole genome shotgun sequence	143000	144000	0.59	1.05	-0.46	48.5
NC_026501.1 Neurospora crassa OR74A linkage group I, whole genome shotgun sequence	143500	144500	0.58	1.2	-0.62	48.9
NC_026501.1 Neurospora crassa OR74A linkage group I, whole genome shotgun sequence	144000	145000	0.71	1.13	-0.41	47.5
NC_026501.1 Neurospora crassa OR74A linkage group I, whole genome shotgun sequence	144500	145500	0.66	1.06	-0.4	50.1
NC_026501.1 Neurospora crassa OR74A linkage group I, whole genome shotgun sequence	145000	146000	0.43	1.37	-0.94	52.4
NC_026501.1 Neurospora crassa OR74A linkage group I, whole genome shotgun sequence	145500	146500	0.24	1.71	-1.46	51.7
NC_026501.1 Neurospora crassa OR74A linkage group I, whole genome shotgun sequence	146000	147000	0.25	1.52	-1.26	53.2
NC_026501.1 Neurospora crassa OR74A linkage group I, whole genome shotgun sequence	146500	147500	0.43	1.3	-0.87	54.5
NC_026501.1 Neurospora crassa OR74A linkage group I, whole genome shotgun sequence	147000	148000	0.46	1.31	-0.85	52.4
NC_026501.1 Neurospora crassa OR74A linkage group I, whole genome shotgun sequence	147500	148500	0.39	1.41	-1.02	51.5
NC_026501.1 Neurospora crassa OR74A linkage group I, whole genome shotgun sequence	148000	149000	0.52	1.19	-0.67	52.4
NC_026501.1 Neurospora crassa OR74A linkage group I, whole genome shotgun sequence	148500	149500	0.62	1.09	-0.47	44.1
NC_026501.1 Neurospora crassa OR74A linkage group I, whole genome shotgun sequence	149000	150000	0.73	1.14	-0.41	40.4
NC_026501.1 Neurospora crassa OR74A linkage group I, whole genome shotgun sequence	149500	150500	0.8	1.13	-0.33	49.1
NC_026501.1 Neurospora crassa OR74A linkage group I, whole genome shotgun sequence	150000	151000	1.02	1.02	0.01	53
NC_026501.1 Neurospora crassa OR74A linkage group I, whole genome shotgun sequence	150500	151500	1.09	0.99	0.1	53.1
NC_026501.1 Neurospora crassa OR74A linkage group I, whole genome shotgun sequence	151000	152000	0.85	1.01	-0.15	57.7
NC_026501.1 Neurospora crassa OR74A linkage group I, whole genome shotgun sequence	151500	152500	0.66	1.1	-0.44	51.9
NC_026501.1 Neurospora crassa OR74A linkage group I, whole genome shotgun sequence	152000	153000	0.77	1.3	-0.53	45.6
NC_026501.1 Neurospora crassa OR74A linkage group I, whole genome shotgun sequence	152500	153500	0.82	1.3	-0.48	51.8
NC_026501.1 Neurospora crassa OR74A linkage group I, whole genome shotgun sequence	153000	154000	0.65	1.23	-0.58	54.6
NC_026501.1 Neurospora crassa OR74A linkage group I, whole genome shotgun sequence	153500	154500	0.52	1.26	-0.75	55.1
NC_026501.1 Neurospora crassa OR74A linkage group I, whole genome shotgun sequence	154000	155000	0.58	1.02	-0.43	50.4
NC_026501.1 Neurospora crassa OR74A linkage group I, whole genome shotgun sequence	154500	155500	0.79	0.95	-0.16	44.2
NC_026501.1 Neurospora crassa OR74A linkage group I, whole genome shotgun sequence	155000	156000	0.87	1.02	-0.15	48.8
NC_026501.1 Neurospora crassa OR74A linkage group I, whole genome shotgun sequence	155500	156500	0.67	1.12	-0.46	56.7
NC_026501.1 Neurospora crassa OR74A linkage group I, whole genome shotgun sequence	156000	157000	0.64	1.22	-0.59	55.5
NC_026501.1 Neurospora crassa OR74A linkage group I, whole genome shotgun sequence	156500	157500	0.62	1.3	-0.68	48.8
NC_026501.1 Neurospora crassa OR74A linkage group I, whole genome shotgun sequence	157000	158000	0.59	1.5	-0.9	46.7
NC_026501.1 Neurospora crassa OR74A linkage group I, whole genome shotgun sequence	157500	158500	0.56	1.31	-0.75	42.6
NC_026501.1 Neurospora crassa OR74A linkage group I, whole genome shotgun sequence	158000	159000	0.63	0.92	-0.29	42.4
NC_026501.1 Neurospora crassa OR74A linkage group I, whole genome shotgun sequence	158500	159500	0.72	0.91	-0.19	48.3
NC_026501.1 Neurospora crassa OR74A linkage group I, whole genome shotgun sequence	159000	160000	0.53	1.15	-0.61	51
NC_026501.1 Neurospora crassa OR74A linkage group I, whole genome shotgun sequence	159500	160500	0.48	1.33	-0.84	50.7
NC_026501.1 Neurospora crassa OR74A linkage group I, whole genome shotgun sequence	160000	161000	0.62	1.14	-0.52	46.5
NC_026501.1 Neurospora crassa OR74A linkage group I, whole genome shotgun sequence	160500	161500	0.64	1.24	-0.6	43.7
NC_026501.1 Neurospora crassa OR74A linkage group I, whole genome shotgun sequence	161000	162000	0.72	1.16	-0.43	46.5
NC_026501.1 Neurospora crassa OR74A linkage group I, whole genome shotgun sequence	161500	162500	0.79	1.05	-0.26	50.3
NC_026501.1 Neurospora crassa OR74A linkage group I, whole genome shotgun sequence	162000	163000	0.82	1.03	-0.21	46
NC_026501.1 Neurospora crassa OR74A linkage group I, whole genome shotgun sequence	162500	163500	0.89	1.02	-0.13	45.8
NC_026501.1 Neurospora crassa OR74A linkage group I, whole genome shotgun sequence	163000	164000	0.62	1.26	-0.64	51.2
NC_026501.1 Neurospora crassa OR74A linkage group I, whole genome shotgun sequence	163500	164500	0.54	1.33	-0.79	53.1
NC_026501.1 Neurospora crassa OR74A linkage group I, whole genome shotgun sequence	164000	165000	0.75	1.26	-0.51	51
NC_026501.1 Neurospora crassa OR74A linkage group I, whole genome shotgun sequence	164500	165500	0.6	1.26	-0.66	47.6
NC_026501.1 Neurospora crassa OR74A linkage group I, whole genome shotgun sequence	165000	166000	0.59	1.22	-0.63	48.7
NC_026501.1 Neurospora crassa OR74A linkage group I, whole genome shotgun sequence	165500	166500	0.68	1.16	-0.49	46
NC_026501.1 Neurospora crassa OR74A linkage group I, whole genome shotgun sequence	166000	167000	0.64	1.14	-0.51	47
NC_026501.1 Neurospora crassa OR74A linkage group I, whole genome shotgun sequence	166500	167500	0.56	1.07	-0.51	48
NC_026501.1 Neurospora crassa OR74A linkage group I, whole genome shotgun sequence	167000	168000	0.81	0.88	-0.07	42.7
NC_026501.1 Neurospora crassa OR74A linkage group I, whole genome shotgun sequence	167500	168500	1.04	1.01	0.03	41.7
NC_026501.1 Neurospora crassa OR74A linkage group I, whole genome shotgun sequence	168000	169000	0.55	1.38	-0.83	40.3
NC_026501.1 Neurospora crassa OR74A linkage group I, whole genome shotgun sequence	168500	169500	0.49	1.28	-0.79	40.2
NC_026501.1 Neurospora crassa OR74A linkage group I, whole genome shotgun sequence	169000	170000	0.83	1.14	-0.31	42.9
NC_026501.1 Neurospora crassa OR74A linkage group I, whole genome shotgun sequence	169500	170500	0.92	1.1	-0.19	44.8
NC_026501.1 Neurospora crassa OR74A linkage group I, whole genome shotgun sequence	170000	171000	0.89	1.12	-0.23	45.9
NC_026501.1 Neurospora crassa OR74A linkage group I, whole genome shotgun sequence	170500	171500	0.79	1.09	-0.3	49.9
NC_026501.1 Neurospora crassa OR74A linkage group I, whole genome shotgun sequence	171000	172000	0.76	1	-0.24	52.3
NC_026501.1 Neurospora crassa OR74A linkage group I, whole genome shotgun sequence	171500	172500	0.74	1.09	-0.35	51
NC_026501.1 Neurospora crassa OR74A linkage group I, whole genome shotgun sequence	172000	173000	0.6	1.33	-0.73	46.4
NC_026501.1 Neurospora crassa OR74A linkage group I, whole genome shotgun sequence	172500	173500	0.55	1.39	-0.84	44.8
NC_026501.1 Neurospora crassa OR74A linkage group I, whole genome shotgun sequence	173000	174000	0.76	1.12	-0.36	49.6
NC_026501.1 Neurospora crassa OR74A linkage group I, whole genome shotgun sequence	173500	174500	0.98	0.91	0.06	45.1
NC_026501.1 Neurospora crassa OR74A linkage group I, whole genome shotgun sequence	174000	175000	0.76	1.07	-0.31	43
NC_026501.1 Neurospora crassa OR74A linkage group I, whole genome shotgun sequence	174500	175500	0.67	1.24	-0.57	44
NC_026501.1 Neurospora crassa OR74A linkage group I, whole genome shotgun sequence	175000	176000	0.76	1.16	-0.4	46.2
NC_026501.1 Neurospora crassa OR74A linkage group I, whole genome shotgun sequence	175500	176500	0.76	1.13	-0.37	46
NC_026501.1 Neurospora crassa OR74A linkage group I, whole genome shotgun sequence	176000	177000	0.67	1.21	-0.54	49.3
NC_026501.1 Neurospora crassa OR74A linkage group I, whole genome shotgun sequence	176500	177500	0.6	1.17	-0.57	58.5
NC_026501.1 Neurospora crassa OR74A linkage group I, whole genome shotgun sequence	177000	178000	0.61	1.02	-0.42	53.1
NC_026501.1 Neurospora crassa OR74A linkage group I, whole genome shotgun sequence	177500	178500	0.58	1.12	-0.54	48.8
NC_026501.1 Neurospora crassa OR74A linkage group I, whole genome shotgun sequence	178000	179000	0.56	1.3	-0.74	49.1
NC_026501.1 Neurospora crassa OR74A linkage group I, whole genome shotgun sequence	178500	179500	0.48	1.19	-0.71	51
NC_026501.1 Neurospora crassa OR74A linkage group I, whole genome shotgun sequence	179000	180000	0.31	1.28	-0.98	55.1
NC_026501.1 Neurospora crassa OR74A linkage group I, whole genome shotgun sequence	179500	180500	0.56	1.21	-0.65	53.7
NC_026501.1 Neurospora crassa OR74A linkage group I, whole genome shotgun sequence	180000	181000	0.75	1.13	-0.38	47.8
NC_026501.1 Neurospora crassa OR74A linkage group I, whole genome shotgun sequence	180500	181500	0.79	1.16	-0.37	48.1
NC_026501.1 Neurospora crassa OR74A linkage group I, whole genome shotgun sequence	181000	182000	0.56	1.27	-0.71	51.7
NC_026501.1 Neurospora crassa OR74A linkage group I, whole genome shotgun sequence	181500	182500	0.47	1.36	-0.89	51.3
NC_026501.1 Neurospora crassa OR74A linkage group I, whole genome shotgun sequence	182000	183000	0.48	1.3	-0.82	52.5
NC_026501.1 Neurospora crassa OR74A linkage group I, whole genome shotgun sequence	182500	183500	0.45	1.21	-0.76	55.2
NC_026501.1 Neurospora crassa OR74A linkage group I, whole genome shotgun sequence	183000	184000	0.45	1.17	-0.73	54.8
NC_026501.1 Neurospora crassa OR74A linkage group I, whole genome shotgun sequence	183500	184500	0.35	1.31	-0.96	50.6
NC_026501.1 Neurospora crassa OR74A linkage group I, whole genome shotgun sequence	184000	185000	0.51	1.25	-0.74	50.9
NC_026501.1 Neurospora crassa OR74A linkage group I, whole genome shotgun sequence	184500	185500	0.68	1.19	-0.51	50.8
NC_026501.1 Neurospora crassa OR74A linkage group I, whole genome shotgun sequence	185000	186000	0.66	1.13	-0.47	48.5
NC_026501.1 Neurospora crassa OR74A linkage group I, whole genome shotgun sequence	185500	186500	0.54	1.22	-0.68	50.1
NC_026501.1 Neurospora crassa OR74A linkage group I, whole genome shotgun sequence	186000	187000	0.49	1.41	-0.92	53.2
NC_026501.1 Neurospora crassa OR74A linkage group I, whole genome shotgun sequence	186500	187500	0.57	1.4	-0.82	56.5
NC_026501.1 Neurospora crassa OR74A linkage group I, whole genome shotgun sequence	187000	188000	0.43	1.38	-0.95	56.1
NC_026501.1 Neurospora crassa OR74A linkage group I, whole genome shotgun sequence	187500	188500	0.48	1.34	-0.85	50.9
NC_026501.1 Neurospora crassa OR74A linkage group I, whole genome shotgun sequence	188000	189000	0.58	1.41	-0.83	46.6
NC_026501.1 Neurospora crassa OR74A linkage group I, whole genome shotgun sequence	188500	189500	0.59	1.14	-0.55	53
NC_026501.1 Neurospora crassa OR74A linkage group I, whole genome shotgun sequence	189000	190000	0.62	1.11	-0.49	53.1
NC_026501.1 Neurospora crassa OR74A linkage group I, whole genome shotgun sequence	189500	190500	0.69	1.27	-0.58	45.7
NC_026501.1 Neurospora crassa OR74A linkage group I, whole genome shotgun sequence	190000	191000	0.59	1.11	-0.52	46.8
NC_026501.1 Neurospora crassa OR74A linkage group I, whole genome shotgun sequence	190500	191500	0.51	1.26	-0.75	45.7
NC_026501.1 Neurospora crassa OR74A linkage group I, whole genome shotgun sequence	191000	192000	0.56	1.4	-0.84	45.8
NC_026501.1 Neurospora crassa OR74A linkage group I, whole genome shotgun sequence	191500	192500	0.56	1.32	-0.76	47.1
NC_026501.1 Neurospora crassa OR74A linkage group I, whole genome shotgun sequence	192000	193000	0.66	1.28	-0.62	45.4
NC_026501.1 Neurospora crassa OR74A linkage group I, whole genome shotgun sequence	192500	193500	0.59	1.45	-0.86	45
NC_026501.1 Neurospora crassa OR74A linkage group I, whole genome shotgun sequence	193000	194000	0.56	1.34	-0.78	47.2
NC_026501.1 Neurospora crassa OR74A linkage group I, whole genome shotgun sequence	193500	194500	0.63	1.14	-0.5	48.4
NC_026501.1 Neurospora crassa OR74A linkage group I, whole genome shotgun sequence	194000	195000	0.63	1.15	-0.52	42.7
NC_026501.1 Neurospora crassa OR74A linkage group I, whole genome shotgun sequence	194500	195500	0.75	1.17	-0.42	41.5
NC_026501.1 Neurospora crassa OR74A linkage group I, whole genome shotgun sequence	195000	196000	0.86	1.15	-0.29	41.7
NC_026501.1 Neurospora crassa OR74A linkage group I, whole genome shotgun sequence	195500	196500	0.72	1.19	-0.47	45.3
NC_026501.1 Neurospora crassa OR74A linkage group I, whole genome shotgun sequence	196000	197000	0.56	1.25	-0.69	50.2
NC_026501.1 Neurospora crassa OR74A linkage group I, whole genome shotgun sequence	196500	197500	0.69	1.29	-0.6	43.4
NC_026501.1 Neurospora crassa OR74A linkage group I, whole genome shotgun sequence	197000	198000	0.76	1.2	-0.44	44.6
NC_026501.1 Neurospora crassa OR74A linkage group I, whole genome shotgun sequence	197500	198500	0.61	1.18	-0.56	51.2
NC_026501.1 Neurospora crassa OR74A linkage group I, whole genome shotgun sequence	198000	199000	0.63	1.12	-0.5	51.5
NC_026501.1 Neurospora crassa OR74A linkage group I, whole genome shotgun sequence	198500	199500	0.6	1.17	-0.58	52.1
NC_026501.1 Neurospora crassa OR74A linkage group I, whole genome shotgun sequence	199000	200000	1.15	0.98	0.17	40.8
NC_026501.1 Neurospora crassa OR74A linkage group I, whole genome shotgun sequence	199500	200500	2.31	0.44	1.87	24.6
NC_026501.1 Neurospora crassa OR74A linkage group I, whole genome shotgun sequence	200000	201000	2.61	0.17	2.44	21.9
NC_026501.1 Neurospora crassa OR74A linkage group I, whole genome shotgun sequence	200500	201500	2.36	0.24	2.12	16.4
NC_026501.1 Neurospora crassa OR74A linkage group I, whole genome shotgun sequence	201000	202000	2.24	0.27	1.97	12.8
NC_026501.1 Neurospora crassa OR74A linkage group I, whole genome shotgun sequence	201500	202500	1.85	0.33	1.52	14.8
NC_026501.1 Neurospora crassa OR74A linkage group I, whole genome shotgun sequence	202000	203000	2	0.32	1.68	12.4
NC_026501.1 Neurospora crassa OR74A linkage group I, whole genome shotgun sequence	202500	203500	2.12	0.31	1.81	13.9
NC_026501.1 Neurospora crassa OR74A linkage group I, whole genome shotgun sequence	203000	204000	1.57	0.48	1.08	12.2
NC_026501.1 Neurospora crassa OR74A linkage group I, whole genome shotgun sequence	203500	204500	1.2	0.62	0.57	9.7
NC_026501.1 Neurospora crassa OR74A linkage group I, whole genome shotgun sequence	204000	205000	1.65	0.38	1.27	12.1
NC_026501.1 Neurospora crassa OR74A linkage group I, whole genome shotgun sequence	204500	205500	1.69	0.17	1.52	14.7
NC_026501.1 Neurospora crassa OR74A linkage group I, whole genome shotgun sequence	205000	206000	1.44	0.43	1.02	17.5
NC_026501.1 Neurospora crassa OR74A linkage group I, whole genome shotgun sequence	205500	206500	1.51	0.44	1.07	17.4
NC_026501.1 Neurospora crassa OR74A linkage group I, whole genome shotgun sequence	206000	207000	1.85	0.31	1.54	14.1
NC_026501.1 Neurospora crassa OR74A linkage group I, whole genome shotgun sequence	206500	207500	1.71	0.44	1.28	12.5
NC_026501.1 Neurospora crassa OR74A linkage group I, whole genome shotgun sequence	207000	208000	1.46	0.47	0.99	13.5
NC_026501.1 Neurospora crassa OR74A linkage group I, whole genome shotgun sequence	207500	208500	1.39	0.58	0.8	15.5
NC_026501.1 Neurospora crassa OR74A linkage group I, whole genome shotgun sequence	208000	209000	0.91	1.09	-0.18	32.6
NC_026501.1 Neurospora crassa OR74A linkage group I, whole genome shotgun sequence	208500	209500	0.7	1.2	-0.5	49.5
NC_026501.1 Neurospora crassa OR74A linkage group I, whole genome shotgun sequence	209000	210000	0.66	1.31	-0.66	48.6
NC_026501.1 Neurospora crassa OR74A linkage group I, whole genome shotgun sequence	209500	210500	0.69	1.34	-0.65	47.9
NC_026501.1 Neurospora crassa OR74A linkage group I, whole genome shotgun sequence	210000	211000	0.66	1.32	-0.66	49.4
NC_026501.1 Neurospora crassa OR74A linkage group I, whole genome shotgun sequence	210500	211500	0.58	1.27	-0.69	49.8
NC_026501.1 Neurospora crassa OR74A linkage group I, whole genome shotgun sequence	211000	212000	0.56	1.3	-0.74	50.4
NC_026501.1 Neurospora crassa OR74A linkage group I, whole genome shotgun sequence	211500	212500	0.6	1.27	-0.66	51.6
NC_026501.1 Neurospora crassa OR74A linkage group I, whole genome shotgun sequence	212000	213000	0.67	1.15	-0.48	51.5
NC_026501.1 Neurospora crassa OR74A linkage group I, whole genome shotgun sequence	212500	213500	0.64	1.27	-0.63	49
NC_026501.1 Neurospora crassa OR74A linkage group I, whole genome shotgun sequence	213000	214000	0.67	1.28	-0.61	45.3
NC_026501.1 Neurospora crassa OR74A linkage group I, whole genome shotgun sequence	213500	214500	0.56	1.26	-0.7	46.2
NC_026501.1 Neurospora crassa OR74A linkage group I, whole genome shotgun sequence	214000	215000	0.71	1.28	-0.57	48.8
NC_026501.1 Neurospora crassa OR74A linkage group I, whole genome shotgun sequence	214500	215500	0.75	1.2	-0.45	51.3
NC_026501.1 Neurospora crassa OR74A linkage group I, whole genome shotgun sequence	215000	216000	0.65	1.21	-0.56	51
NC_026501.1 Neurospora crassa OR74A linkage group I, whole genome shotgun sequence	215500	216500	0.77	1.09	-0.32	45.2
NC_026501.1 Neurospora crassa OR74A linkage group I, whole genome shotgun sequence	216000	217000	0.85	0.99	-0.14	45.2
NC_026501.1 Neurospora crassa OR74A linkage group I, whole genome shotgun sequence	216500	217500	0.71	1.11	-0.4	48
NC_026501.1 Neurospora crassa OR74A linkage group I, whole genome shotgun sequence	217000	218000	0.55	1.3	-0.75	47.3
NC_026501.1 Neurospora crassa OR74A linkage group I, whole genome shotgun sequence	217500	218500	0.68	1.26	-0.58	47.7
NC_026501.1 Neurospora crassa OR74A linkage group I, whole genome shotgun sequence	218000	219000	0.71	1.28	-0.57	45.7
NC_026501.1 Neurospora crassa OR74A linkage group I, whole genome shotgun sequence	218500	219500	0.61	1.34	-0.73	43.7
NC_026501.1 Neurospora crassa OR74A linkage group I, whole genome shotgun sequence	219000	220000	0.8	1.18	-0.38	49.8
NC_026501.1 Neurospora crassa OR74A linkage group I, whole genome shotgun sequence	219500	220500	0.82	0.97	-0.14	57
NC_026501.1 Neurospora crassa OR74A linkage group I, whole genome shotgun sequence	220000	221000	0.63	1.01	-0.37	55.7
NC_026501.1 Neurospora crassa OR74A linkage group I, whole genome shotgun sequence	220500	221500	0.54	1.13	-0.6	51
NC_026501.1 Neurospora crassa OR74A linkage group I, whole genome shotgun sequence	221000	222000	0.58	1.17	-0.59	48.5
NC_026501.1 Neurospora crassa OR74A linkage group I, whole genome shotgun sequence	221500	222500	0.76	1.24	-0.48	48.6
NC_026501.1 Neurospora crassa OR74A linkage group I, whole genome shotgun sequence	222000	223000	0.7	1.27	-0.57	48.5
NC_026501.1 Neurospora crassa OR74A linkage group I, whole genome shotgun sequence	222500	223500	0.82	1.12	-0.3	46.7
NC_026501.1 Neurospora crassa OR74A linkage group I, whole genome shotgun sequence	223000	224000	0.92	1.02	-0.1	47.1
NC_026501.1 Neurospora crassa OR74A linkage group I, whole genome shotgun sequence	223500	224500	0.6	1.12	-0.52	48
NC_026501.1 Neurospora crassa OR74A linkage group I, whole genome shotgun sequence	224000	225000	0.5	1.2	-0.7	49.5
NC_026501.1 Neurospora crassa OR74A linkage group I, whole genome shotgun sequence	224500	225500	0.64	1.15	-0.51	44.2
NC_026501.1 Neurospora crassa OR74A linkage group I, whole genome shotgun sequence	225000	226000	0.57	1.34	-0.77	43.5
NC_026501.1 Neurospora crassa OR74A linkage group I, whole genome shotgun sequence	225500	226500	0.68	1.36	-0.68	47.5
NC_026501.1 Neurospora crassa OR74A linkage group I, whole genome shotgun sequence	226000	227000	0.7	1.4	-0.7	44
NC_026501.1 Neurospora crassa OR74A linkage group I, whole genome shotgun sequence	226500	227500	0.57	1.63	-1.06	41.1
NC_026501.1 Neurospora crassa OR74A linkage group I, whole genome shotgun sequence	227000	228000	0.8	1.22	-0.41	37.2
NC_026501.1 Neurospora crassa OR74A linkage group I, whole genome shotgun sequence	227500	228500	0.59	1.23	-0.63	43.7
NC_026501.1 Neurospora crassa OR74A linkage group I, whole genome shotgun sequence	228000	229000	0.37	1.27	-0.9	45.5
NC_026501.1 Neurospora crassa OR74A linkage group I, whole genome shotgun sequence	228500	229500	0.45	1.22	-0.78	43.6
NC_026501.1 Neurospora crassa OR74A linkage group I, whole genome shotgun sequence	229000	230000	0.4	1.3	-0.9	49.4
NC_026501.1 Neurospora crassa OR74A linkage group I, whole genome shotgun sequence	229500	230500	0.34	1.3	-0.97	49.8
NC_026501.1 Neurospora crassa OR74A linkage group I, whole genome shotgun sequence	230000	231000	0.41	1.34	-0.94	47.8
NC_026501.1 Neurospora crassa OR74A linkage group I, whole genome shotgun sequence	230500	231500	0.74	1.14	-0.4	47.5
NC_026501.1 Neurospora crassa OR74A linkage group I, whole genome shotgun sequence	231000	232000	0.89	1.06	-0.17	43.6
NC_026501.1 Neurospora crassa OR74A linkage group I, whole genome shotgun sequence	231500	232500	0.71	1.17	-0.46	44.9
NC_026501.1 Neurospora crassa OR74A linkage group I, whole genome shotgun sequence	232000	233000	0.5	1.27	-0.77	51.5
NC_026501.1 Neurospora crassa OR74A linkage group I, whole genome shotgun sequence	232500	233500	0.45	1.45	-1	51.7
NC_026501.1 Neurospora crassa OR74A linkage group I, whole genome shotgun sequence	233000	234000	0.48	1.16	-0.68	51.7
NC_026501.1 Neurospora crassa OR74A linkage group I, whole genome shotgun sequence	233500	234500	0.56	1	-0.44	51.8
NC_026501.1 Neurospora crassa OR74A linkage group I, whole genome shotgun sequence	234000	235000	0.8	1.09	-0.29	48.1
NC_026501.1 Neurospora crassa OR74A linkage group I, whole genome shotgun sequence	234500	235500	0.91	1.07	-0.16	46.6
NC_026501.1 Neurospora crassa OR74A linkage group I, whole genome shotgun sequence	235000	236000	0.76	1.19	-0.42	48.3
NC_026501.1 Neurospora crassa OR74A linkage group I, whole genome shotgun sequence	235500	236500	0.71	1.06	-0.36	49.4
NC_026501.1 Neurospora crassa OR74A linkage group I, whole genome shotgun sequence	236000	237000	0.82	1	-0.18	47.3
NC_026501.1 Neurospora crassa OR74A linkage group I, whole genome shotgun sequence	236500	237500	0.65	1.17	-0.52	47.6
NC_026501.1 Neurospora crassa OR74A linkage group I, whole genome shotgun sequence	237000	238000	0.47	1.24	-0.77	53.6
NC_026501.1 Neurospora crassa OR74A linkage group I, whole genome shotgun sequence	237500	238500	0.58	1.14	-0.56	52
NC_026501.1 Neurospora crassa OR74A linkage group I, whole genome shotgun sequence	238000	239000	0.6	1.21	-0.61	47.5
NC_026501.1 Neurospora crassa OR74A linkage group I, whole genome shotgun sequence	238500	239500	0.44	1.39	-0.95	49.2
NC_026501.1 Neurospora crassa OR74A linkage group I, whole genome shotgun sequence	239000	240000	0.38	1.26	-0.88	53.7
NC_026501.1 Neurospora crassa OR74A linkage group I, whole genome shotgun sequence	239500	240500	0.45	1.25	-0.8	52.2
NC_026501.1 Neurospora crassa OR74A linkage group I, whole genome shotgun sequence	240000	241000	0.54	1.34	-0.8	46.8
NC_026501.1 Neurospora crassa OR74A linkage group I, whole genome shotgun sequence	240500	241500	0.57	1.17	-0.59	44.2
NC_026501.1 Neurospora crassa OR74A linkage group I, whole genome shotgun sequence	241000	242000	0.54	0.94	-0.41	45.9
NC_026501.1 Neurospora crassa OR74A linkage group I, whole genome shotgun sequence	241500	242500	0.78	1.01	-0.23	46.2
NC_026501.1 Neurospora crassa OR74A linkage group I, whole genome shotgun sequence	242000	243000	0.75	1.19	-0.44	46.7
NC_026501.1 Neurospora crassa OR74A linkage group I, whole genome shotgun sequence	242500	243500	0.7	1.2	-0.51	46.5
NC_026501.1 Neurospora crassa OR74A linkage group I, whole genome shotgun sequence	243000	244000	0.47	1.39	-0.92	38.4
NC_026501.1 Neurospora crassa OR74A linkage group I, whole genome shotgun sequence	243500	244500	0.55	1.33	-0.79	38.8
NC_026501.1 Neurospora crassa OR74A linkage group I, whole genome shotgun sequence	244000	245000	0.68	1.13	-0.45	47.2
NC_026501.1 Neurospora crassa OR74A linkage group I, whole genome shotgun sequence	244500	245500	0.52	1.22	-0.7	51.1
NC_026501.1 Neurospora crassa OR74A linkage group I, whole genome shotgun sequence	245000	246000	0.51	1.15	-0.64	51.8
NC_026501.1 Neurospora crassa OR74A linkage group I, whole genome shotgun sequence	245500	246500	0.7	1.12	-0.42	50.2
NC_026501.1 Neurospora crassa OR74A linkage group I, whole genome shotgun sequence	246000	247000	0.65	1.12	-0.47	48.1
NC_026501.1 Neurospora crassa OR74A linkage group I, whole genome shotgun sequence	246500	247500	0.51	1.31	-0.8	49.2
NC_026501.1 Neurospora crassa OR74A linkage group I, whole genome shotgun sequence	247000	248000	0.88	1.18	-0.3	53.6
NC_026501.1 Neurospora crassa OR74A linkage group I, whole genome shotgun sequence	247500	248500	1.05	1	0.05	52.7
NC_026501.1 Neurospora crassa OR74A linkage group I, whole genome shotgun sequence	248000	249000	0.75	1.13	-0.38	50.1
NC_026501.1 Neurospora crassa OR74A linkage group I, whole genome shotgun sequence	248500	249500	0.67	1.2	-0.53	49
NC_026501.1 Neurospora crassa OR74A linkage group I, whole genome shotgun sequence	249000	250000	0.73	1.14	-0.41	51.3
NC_026501.1 Neurospora crassa OR74A linkage group I, whole genome shotgun sequence	249500	250500	0.54	1.2	-0.66	55
NC_026501.1 Neurospora crassa OR74A linkage group I, whole genome shotgun sequence	250000	251000	0.62	1.16	-0.54	54.9
NC_026501.1 Neurospora crassa OR74A linkage group I, whole genome shotgun sequence	250500	251500	0.73	1.11	-0.38	53.6
NC_026501.1 Neurospora crassa OR74A linkage group I, whole genome shotgun sequence	251000	252000	0.62	1.13	-0.51	53.3
NC_026501.1 Neurospora crassa OR74A linkage group I, whole genome shotgun sequence	251500	252500	0.46	1.22	-0.76	48.7
NC_026501.1 Neurospora crassa OR74A linkage group I, whole genome shotgun sequence	252000	253000	0.57	1.32	-0.75	46.3
NC_026501.1 Neurospora crassa OR74A linkage group I, whole genome shotgun sequence	252500	253500	0.62	1.32	-0.7	50.4
NC_026501.1 Neurospora crassa OR74A linkage group I, whole genome shotgun sequence	253000	254000	0.6	1.27	-0.68	54.2
NC_026501.1 Neurospora crassa OR74A linkage group I, whole genome shotgun sequence	253500	254500	0.77	1.31	-0.54	54.1
NC_026501.1 Neurospora crassa OR74A linkage group I, whole genome shotgun sequence	254000	255000	0.67	1.39	-0.72	49.4
NC_026501.1 Neurospora crassa OR74A linkage group I, whole genome shotgun sequence	254500	255500	0.51	1.22	-0.71	46.2
NC_026501.1 Neurospora crassa OR74A linkage group I, whole genome shotgun sequence	255000	256000	0.48	1.27	-0.79	47.5
NC_026501.1 Neurospora crassa OR74A linkage group I, whole genome shotgun sequence	255500	256500	0.7	1.16	-0.46	47.5
NC_026501.1 Neurospora crassa OR74A linkage group I, whole genome shotgun sequence	256000	257000	1.1	1.01	0.09	46.7
NC_026501.1 Neurospora crassa OR74A linkage group I, whole genome shotgun sequence	256500	257500	0.88	1.08	-0.2	47.5
NC_026501.1 Neurospora crassa OR74A linkage group I, whole genome shotgun sequence	257000	258000	0.56	1.21	-0.64	50.4
NC_026501.1 Neurospora crassa OR74A linkage group I, whole genome shotgun sequence	257500	258500	0.45	1.21	-0.76	51.5
NC_026501.1 Neurospora crassa OR74A linkage group I, whole genome shotgun sequence	258000	259000	0.43	1.23	-0.8	49.9
NC_026501.1 Neurospora crassa OR74A linkage group I, whole genome shotgun sequence	258500	259500	0.68	1.17	-0.49	46.8
NC_026501.1 Neurospora crassa OR74A linkage group I, whole genome shotgun sequence	259000	260000	0.79	1.12	-0.33	45.1
NC_026501.1 Neurospora crassa OR74A linkage group I, whole genome shotgun sequence	259500	260500	0.66	1.23	-0.57	48.8
NC_026501.1 Neurospora crassa OR74A linkage group I, whole genome shotgun sequence	260000	261000	0.84	1.08	-0.25	49.2
NC_026501.1 Neurospora crassa OR74A linkage group I, whole genome shotgun sequence	260500	261500	1.66	0.81	0.85	46.9
NC_026501.1 Neurospora crassa OR74A linkage group I, whole genome shotgun sequence	261000	262000	1.49	0.78	0.71	44.5
NC_026501.1 Neurospora crassa OR74A linkage group I, whole genome shotgun sequence	261500	262500	0.8	1.05	-0.25	47.4
NC_026501.1 Neurospora crassa OR74A linkage group I, whole genome shotgun sequence	262000	263000	0.53	1.2	-0.68	50.9
NC_026501.1 Neurospora crassa OR74A linkage group I, whole genome shotgun sequence	262500	263500	0.53	1.31	-0.78	51.2
NC_026501.1 Neurospora crassa OR74A linkage group I, whole genome shotgun sequence	263000	264000	0.63	1.32	-0.69	47.7
NC_026501.1 Neurospora crassa OR74A linkage group I, whole genome shotgun sequence	263500	264500	0.73	1.22	-0.49	48.2
NC_026501.1 Neurospora crassa OR74A linkage group I, whole genome shotgun sequence	264000	265000	0.57	1.29	-0.72	51
NC_026501.1 Neurospora crassa OR74A linkage group I, whole genome shotgun sequence	264500	265500	0.49	1.29	-0.8	49
NC_026501.1 Neurospora crassa OR74A linkage group I, whole genome shotgun sequence	265000	266000	0.52	1.37	-0.85	49.2
NC_026501.1 Neurospora crassa OR74A linkage group I, whole genome shotgun sequence	265500	266500	0.62	1.36	-0.74	47.1
NC_026501.1 Neurospora crassa OR74A linkage group I, whole genome shotgun sequence	266000	267000	0.81	1.16	-0.35	42.6
NC_026501.1 Neurospora crassa OR74A linkage group I, whole genome shotgun sequence	266500	267500	1.21	0.92	0.29	36
NC_026501.1 Neurospora crassa OR74A linkage group I, whole genome shotgun sequence	267000	268000	1.49	0.64	0.85	25.7
NC_026501.1 Neurospora crassa OR74A linkage group I, whole genome shotgun sequence	267500	268500	1.48	0.48	1	16.2
NC_026501.1 Neurospora crassa OR74A linkage group I, whole genome shotgun sequence	268000	269000	1.51	0.41	1.1	15.4
NC_026501.1 Neurospora crassa OR74A linkage group I, whole genome shotgun sequence	268500	269500	1.74	0.42	1.32	18.7
NC_026501.1 Neurospora crassa OR74A linkage group I, whole genome shotgun sequence	269000	270000	1.87	0.42	1.45	21.4
NC_026501.1 Neurospora crassa OR74A linkage group I, whole genome shotgun sequence	269500	270500	2	0.56	1.44	30.8
NC_026501.1 Neurospora crassa OR74A linkage group I, whole genome shotgun sequence	270000	271000	1.57	0.75	0.82	34.1
NC_026501.1 Neurospora crassa OR74A linkage group I, whole genome shotgun sequence	270500	271500	1.62	0.56	1.05	22
NC_026501.1 Neurospora crassa OR74A linkage group I, whole genome shotgun sequence	271000	272000	2.11	0.3	1.81	11.9
NC_026501.1 Neurospora crassa OR74A linkage group I, whole genome shotgun sequence	271500	272500	2.11	0.51	1.6	16.2
NC_026501.1 Neurospora crassa OR74A linkage group I, whole genome shotgun sequence	272000	273000	1.5	0.59	0.91	19.7
NC_026501.1 Neurospora crassa OR74A linkage group I, whole genome shotgun sequence	272500	273500	1.17	0.69	0.47	12.2
NC_026501.1 Neurospora crassa OR74A linkage group I, whole genome shotgun sequence	273000	274000	1.2	0.72	0.48	13.6
NC_026501.1 Neurospora crassa OR74A linkage group I, whole genome shotgun sequence	273500	274500	1.14	0.6	0.54	16.8
NC_026501.1 Neurospora crassa OR74A linkage group I, whole genome shotgun sequence	274000	275000	1.3	0.44	0.86	16.4
NC_026501.1 Neurospora crassa OR74A linkage group I, whole genome shotgun sequence	274500	275500	1.92	0.32	1.6	12.4
NC_026501.1 Neurospora crassa OR74A linkage group I, whole genome shotgun sequence	275000	276000	1.72	0.38	1.34	10.9
NC_026501.1 Neurospora crassa OR74A linkage group I, whole genome shotgun sequence	275500	276500	1.56	0.44	1.12	14.3
NC_026501.1 Neurospora crassa OR74A linkage group I, whole genome shotgun sequence	276000	277000	1.38	0.49	0.9	15.1
NC_026501.1 Neurospora crassa OR74A linkage group I, whole genome shotgun sequence	276500	277500	1.23	0.68	0.54	15.1
NC_026501.1 Neurospora crassa OR74A linkage group I, whole genome shotgun sequence	277000	278000	1.12	0.79	0.33	15.1
NC_026501.1 Neurospora crassa OR74A linkage group I, whole genome shotgun sequence	277500	278500	0.98	0.89	0.09	15.5
NC_026501.1 Neurospora crassa OR74A linkage group I, whole genome shotgun sequence	278000	279000	0.88	0.96	-0.09	14.9
NC_026501.1 Neurospora crassa OR74A linkage group I, whole genome shotgun sequence	278500	279500	1.1	0.71	0.39	18.8
NC_026501.1 Neurospora crassa OR74A linkage group I, whole genome shotgun sequence	279000	280000	1.34	0.49	0.85	17.7
NC_026501.1 Neurospora crassa OR74A linkage group I, whole genome shotgun sequence	279500	280500	1.4	0.39	1.01	13.9
NC_026501.1 Neurospora crassa OR74A linkage group I, whole genome shotgun sequence	280000	281000	1.28	0.53	0.75	17.3
NC_026501.1 Neurospora crassa OR74A linkage group I, whole genome shotgun sequence	280500	281500	1.38	0.58	0.8	17.2
NC_026501.1 Neurospora crassa OR74A linkage group I, whole genome shotgun sequence	281000	282000	1.51	0.52	0.99	13.9
NC_026501.1 Neurospora crassa OR74A linkage group I, whole genome shotgun sequence	281500	282500	1.35	0.57	0.78	16.6
NC_026501.1 Neurospora crassa OR74A linkage group I, whole genome shotgun sequence	282000	283000	1.39	0.62	0.77	18.9
NC_026501.1 Neurospora crassa OR74A linkage group I, whole genome shotgun sequence	282500	283500	1.68	0.57	1.11	13.9
NC_026501.1 Neurospora crassa OR74A linkage group I, whole genome shotgun sequence	283000	284000	1.63	0.69	0.94	10.4
NC_026501.1 Neurospora crassa OR74A linkage group I, whole genome shotgun sequence	283500	284500	1.28	0.88	0.41	11.3
NC_026501.1 Neurospora crassa OR74A linkage group I, whole genome shotgun sequence	284000	285000	1.34	0.65	0.69	18.2
NC_026501.1 Neurospora crassa OR74A linkage group I, whole genome shotgun sequence	284500	285500	1.41	0.56	0.85	17.4
NC_026501.1 Neurospora crassa OR74A linkage group I, whole genome shotgun sequence	285000	286000	1.73	0.47	1.26	9.1
NC_026501.1 Neurospora crassa OR74A linkage group I, whole genome shotgun sequence	285500	286500	1.72	0.49	1.24	13.3
NC_026501.1 Neurospora crassa OR74A linkage group I, whole genome shotgun sequence	286000	287000	1.39	0.66	0.73	20.6
NC_026501.1 Neurospora crassa OR74A linkage group I, whole genome shotgun sequence	286500	287500	1.52	0.56	0.97	17.4
NC_026501.1 Neurospora crassa OR74A linkage group I, whole genome shotgun sequence	287000	288000	1.75	0.39	1.36	16.3
NC_026501.1 Neurospora crassa OR74A linkage group I, whole genome shotgun sequence	287500	288500	1.62	0.59	1.04	25.4
NC_026501.1 Neurospora crassa OR74A linkage group I, whole genome shotgun sequence	288000	289000	1.29	0.85	0.44	33.6
NC_026501.1 Neurospora crassa OR74A linkage group I, whole genome shotgun sequence	288500	289500	1.21	0.99	0.22	39.4
NC_026501.1 Neurospora crassa OR74A linkage group I, whole genome shotgun sequence	289000	290000	1.07	1.03	0.05	42.1
NC_026501.1 Neurospora crassa OR74A linkage group I, whole genome shotgun sequence	289500	290500	0.84	1.15	-0.31	44.9
NC_026501.1 Neurospora crassa OR74A linkage group I, whole genome shotgun sequence	290000	291000	0.64	1.38	-0.74	47.4
NC_026501.1 Neurospora crassa OR74A linkage group I, whole genome shotgun sequence	290500	291500	0.64	1.36	-0.72	46
NC_026501.1 Neurospora crassa OR74A linkage group I, whole genome shotgun sequence	291000	292000	0.71	1.22	-0.5	48.2
NC_026501.1 Neurospora crassa OR74A linkage group I, whole genome shotgun sequence	291500	292500	0.76	1.11	-0.35	51.4
NC_026501.1 Neurospora crassa OR74A linkage group I, whole genome shotgun sequence	292000	293000	0.81	1.07	-0.26	37
NC_026501.1 Neurospora crassa OR74A linkage group I, whole genome shotgun sequence	292500	293500	0.79	1.13	-0.34	34.5
NC_026501.1 Neurospora crassa OR74A linkage group I, whole genome shotgun sequence	293000	294000	0.63	1.27	-0.64	47.2
NC_026501.1 Neurospora crassa OR74A linkage group I, whole genome shotgun sequence	293500	294500	0.44	1.39	-0.96	51
NC_026501.1 Neurospora crassa OR74A linkage group I, whole genome shotgun sequence	294000	295000	0.74	1.24	-0.5	50.1
NC_026501.1 Neurospora crassa OR74A linkage group I, whole genome shotgun sequence	294500	295500	0.82	1.14	-0.31	46.5
NC_026501.1 Neurospora crassa OR74A linkage group I, whole genome shotgun sequence	295000	296000	0.82	1.11	-0.29	48
NC_026501.1 Neurospora crassa OR74A linkage group I, whole genome shotgun sequence	295500	296500	0.78	1.17	-0.38	44.7
NC_026501.1 Neurospora crassa OR74A linkage group I, whole genome shotgun sequence	296000	297000	0.56	1.32	-0.77	47.1
NC_026501.1 Neurospora crassa OR74A linkage group I, whole genome shotgun sequence	296500	297500	0.4	1.24	-0.84	57.3
NC_026501.1 Neurospora crassa OR74A linkage group I, whole genome shotgun sequence	297000	298000	0.71	0.96	-0.25	55.5
NC_026501.1 Neurospora crassa OR74A linkage group I, whole genome shotgun sequence	297500	298500	0.67	1.15	-0.49	49.3
NC_026501.1 Neurospora crassa OR74A linkage group I, whole genome shotgun sequence	298000	299000	0.63	1.36	-0.73	44.1
NC_026501.1 Neurospora crassa OR74A linkage group I, whole genome shotgun sequence	298500	299500	0.68	1.31	-0.64	46.7
NC_026501.1 Neurospora crassa OR74A linkage group I, whole genome shotgun sequence	299000	300000	0.65	1.22	-0.57	53.1
NC_026501.1 Neurospora crassa OR74A linkage group I, whole genome shotgun sequence	299500	300500	0.87	1.06	-0.19	48.1
NC_026501.1 Neurospora crassa OR74A linkage group I, whole genome shotgun sequence	300000	301000	1	1.15	-0.15	43.9
NC_026501.1 Neurospora crassa OR74A linkage group I, whole genome shotgun sequence	300500	301500	0.92	1.2	-0.28	47.6
NC_026501.1 Neurospora crassa OR74A linkage group I, whole genome shotgun sequence	301000	302000	0.69	1.22	-0.53	48.9
NC_026501.1 Neurospora crassa OR74A linkage group I, whole genome shotgun sequence	301500	302500	0.55	1.36	-0.81	47.1
NC_026501.1 Neurospora crassa OR74A linkage group I, whole genome shotgun sequence	302000	303000	0.55	1.33	-0.78	49
NC_026501.1 Neurospora crassa OR74A linkage group I, whole genome shotgun sequence	302500	303500	0.74	1.13	-0.38	54.1
NC_026501.1 Neurospora crassa OR74A linkage group I, whole genome shotgun sequence	303000	304000	0.77	1.07	-0.3	52.3
NC_026501.1 Neurospora crassa OR74A linkage group I, whole genome shotgun sequence	303500	304500	0.86	1.16	-0.3	47.8
NC_026501.1 Neurospora crassa OR74A linkage group I, whole genome shotgun sequence	304000	305000	1.06	1.12	-0.06	42.1
NC_026501.1 Neurospora crassa OR74A linkage group I, whole genome shotgun sequence	304500	305500	1.02	1.02	0	42.6
NC_026501.1 Neurospora crassa OR74A linkage group I, whole genome shotgun sequence	305000	306000	0.78	1.09	-0.31	50
NC_026501.1 Neurospora crassa OR74A linkage group I, whole genome shotgun sequence	305500	306500	0.72	1.15	-0.43	50.2
NC_026501.1 Neurospora crassa OR74A linkage group I, whole genome shotgun sequence	306000	307000	0.56	1.12	-0.56	51.6
NC_026501.1 Neurospora crassa OR74A linkage group I, whole genome shotgun sequence	306500	307500	0.34	1.14	-0.8	52.8
NC_026501.1 Neurospora crassa OR74A linkage group I, whole genome shotgun sequence	307000	308000	0.57	1.1	-0.53	53.5
NC_026501.1 Neurospora crassa OR74A linkage group I, whole genome shotgun sequence	307500	308500	0.79	1.02	-0.24	53.9
NC_026501.1 Neurospora crassa OR74A linkage group I, whole genome shotgun sequence	308000	309000	0.83	1.13	-0.3	53.4
NC_026501.1 Neurospora crassa OR74A linkage group I, whole genome shotgun sequence	308500	309500	0.55	1.36	-0.81	53.1
NC_026501.1 Neurospora crassa OR74A linkage group I, whole genome shotgun sequence	309000	310000	0.34	1.4	-1.06	54.8
NC_026501.1 Neurospora crassa OR74A linkage group I, whole genome shotgun sequence	309500	310500	0.49	1.3	-0.81	54.8
NC_026501.1 Neurospora crassa OR74A linkage group I, whole genome shotgun sequence	310000	311000	0.62	1.15	-0.54	52.2
NC_026501.1 Neurospora crassa OR74A linkage group I, whole genome shotgun sequence	310500	311500	0.71	1.07	-0.36	51
NC_026501.1 Neurospora crassa OR74A linkage group I, whole genome shotgun sequence	311000	312000	0.71	1.13	-0.42	49.1
NC_026501.1 Neurospora crassa OR74A linkage group I, whole genome shotgun sequence	311500	312500	0.59	1.28	-0.69	48.9
NC_026501.1 Neurospora crassa OR74A linkage group I, whole genome shotgun sequence	312000	313000	0.45	1.27	-0.82	49.4
NC_026501.1 Neurospora crassa OR74A linkage group I, whole genome shotgun sequence	312500	313500	0.53	1.26	-0.73	47.4
NC_026501.1 Neurospora crassa OR74A linkage group I, whole genome shotgun sequence	313000	314000	0.58	1.31	-0.73	46.4
NC_026501.1 Neurospora crassa OR74A linkage group I, whole genome shotgun sequence	313500	314500	0.48	1.38	-0.9	42.8
NC_026501.1 Neurospora crassa OR74A linkage group I, whole genome shotgun sequence	314000	315000	0.51	1.39	-0.88	35.1
NC_026501.1 Neurospora crassa OR74A linkage group I, whole genome shotgun sequence	314500	315500	0.77	1.24	-0.47	26.6
NC_026501.1 Neurospora crassa OR74A linkage group I, whole genome shotgun sequence	315000	316000	0.69	1.17	-0.48	33.9
NC_026501.1 Neurospora crassa OR74A linkage group I, whole genome shotgun sequence	315500	316500	0.76	1.06	-0.3	45.2
NC_026501.1 Neurospora crassa OR74A linkage group I, whole genome shotgun sequence	316000	317000	1.05	0.98	0.07	46.2
NC_026501.1 Neurospora crassa OR74A linkage group I, whole genome shotgun sequence	316500	317500	0.82	1.09	-0.28	50.6
NC_026501.1 Neurospora crassa OR74A linkage group I, whole genome shotgun sequence	317000	318000	0.65	1.24	-0.6	48.7
NC_026501.1 Neurospora crassa OR74A linkage group I, whole genome shotgun sequence	317500	318500	0.8	1.2	-0.4	44.7
NC_026501.1 Neurospora crassa OR74A linkage group I, whole genome shotgun sequence	318000	319000	0.85	1.01	-0.16	39.9
NC_026501.1 Neurospora crassa OR74A linkage group I, whole genome shotgun sequence	318500	319500	0.69	1.1	-0.41	37
NC_026501.1 Neurospora crassa OR74A linkage group I, whole genome shotgun sequence	319000	320000	0.64	1.11	-0.47	47.1
NC_026501.1 Neurospora crassa OR74A linkage group I, whole genome shotgun sequence	319500	320500	0.53	1.11	-0.58	56.9
NC_026501.1 Neurospora crassa OR74A linkage group I, whole genome shotgun sequence	320000	321000	0.52	1.18	-0.65	54.6
NC_026501.1 Neurospora crassa OR74A linkage group I, whole genome shotgun sequence	320500	321500	0.65	1.19	-0.54	48.3
NC_026501.1 Neurospora crassa OR74A linkage group I, whole genome shotgun sequence	321000	322000	0.81	1.13	-0.31	47.6
NC_026501.1 Neurospora crassa OR74A linkage group I, whole genome shotgun sequence	321500	322500	0.7	1.11	-0.41	51.7
NC_026501.1 Neurospora crassa OR74A linkage group I, whole genome shotgun sequence	322000	323000	0.65	1.17	-0.52	54.2
NC_026501.1 Neurospora crassa OR74A linkage group I, whole genome shotgun sequence	322500	323500	0.55	1.3	-0.75	55.2
NC_026501.1 Neurospora crassa OR74A linkage group I, whole genome shotgun sequence	323000	324000	0.33	1.5	-1.17	52.8
NC_026501.1 Neurospora crassa OR74A linkage group I, whole genome shotgun sequence	323500	324500	0.4	1.33	-0.93	47.1
NC_026501.1 Neurospora crassa OR74A linkage group I, whole genome shotgun sequence	324000	325000	0.48	1.24	-0.76	43.3
NC_026501.1 Neurospora crassa OR74A linkage group I, whole genome shotgun sequence	324500	325500	0.42	1.25	-0.82	45.4
NC_026501.1 Neurospora crassa OR74A linkage group I, whole genome shotgun sequence	325000	326000	0.62	1.02	-0.4	51.1
NC_026501.1 Neurospora crassa OR74A linkage group I, whole genome shotgun sequence	325500	326500	0.6	1.08	-0.49	54.1
NC_026501.1 Neurospora crassa OR74A linkage group I, whole genome shotgun sequence	326000	327000	0.49	1.22	-0.73	54.8
NC_026501.1 Neurospora crassa OR74A linkage group I, whole genome shotgun sequence	326500	327500	0.76	1.07	-0.31	53.1
NC_026501.1 Neurospora crassa OR74A linkage group I, whole genome shotgun sequence	327000	328000	0.71	1.08	-0.37	52.8
NC_026501.1 Neurospora crassa OR74A linkage group I, whole genome shotgun sequence	327500	328500	0.57	1.21	-0.63	49.1
NC_026501.1 Neurospora crassa OR74A linkage group I, whole genome shotgun sequence	328000	329000	0.65	1.23	-0.58	45.8
NC_026501.1 Neurospora crassa OR74A linkage group I, whole genome shotgun sequence	328500	329500	0.59	1.31	-0.72	51.9
NC_026501.1 Neurospora crassa OR74A linkage group I, whole genome shotgun sequence	329000	330000	0.43	1.35	-0.91	53.7
NC_026501.1 Neurospora crassa OR74A linkage group I, whole genome shotgun sequence	329500	330500	0.5	1.28	-0.78	49.2
NC_026501.1 Neurospora crassa OR74A linkage group I, whole genome shotgun sequence	330000	331000	0.64	1.23	-0.6	44.2
NC_026501.1 Neurospora crassa OR74A linkage group I, whole genome shotgun sequence	330500	331500	0.89	1.07	-0.18	44.2
NC_026501.1 Neurospora crassa OR74A linkage group I, whole genome shotgun sequence	331000	332000	1.13	1.03	0.1	45.1
NC_026501.1 Neurospora crassa OR74A linkage group I, whole genome shotgun sequence	331500	332500	0.98	1.13	-0.15	42.2
NC_026501.1 Neurospora crassa OR74A linkage group I, whole genome shotgun sequence	332000	333000	0.92	1.16	-0.24	43.2
NC_026501.1 Neurospora crassa OR74A linkage group I, whole genome shotgun sequence	332500	333500	0.73	1.03	-0.3	45.8
NC_026501.1 Neurospora crassa OR74A linkage group I, whole genome shotgun sequence	333000	334000	0.77	0.95	-0.18	46.1
NC_026501.1 Neurospora crassa OR74A linkage group I, whole genome shotgun sequence	333500	334500	0.73	1.01	-0.28	44.9
NC_026501.1 Neurospora crassa OR74A linkage group I, whole genome shotgun sequence	334000	335000	0.89	1.07	-0.18	40.6
NC_026501.1 Neurospora crassa OR74A linkage group I, whole genome shotgun sequence	334500	335500	1.05	1.04	0.01	40.4
NC_026501.1 Neurospora crassa OR74A linkage group I, whole genome shotgun sequence	335000	336000	0.7	1.24	-0.54	45.7
NC_026501.1 Neurospora crassa OR74A linkage group I, whole genome shotgun sequence	335500	336500	0.56	1.14	-0.58	53.9
NC_026501.1 Neurospora crassa OR74A linkage group I, whole genome shotgun sequence	336000	337000	0.49	0.98	-0.5	61.3
NC_026501.1 Neurospora crassa OR74A linkage group I, whole genome shotgun sequence	336500	337500	0.56	1.18	-0.62	56.5
NC_026501.1 Neurospora crassa OR74A linkage group I, whole genome shotgun sequence	337000	338000	0.74	1.29	-0.55	52.1
NC_026501.1 Neurospora crassa OR74A linkage group I, whole genome shotgun sequence	337500	338500	0.55	1.2	-0.64	54.9
NC_026501.1 Neurospora crassa OR74A linkage group I, whole genome shotgun sequence	338000	339000	0.41	1.11	-0.7	58.2
NC_026501.1 Neurospora crassa OR74A linkage group I, whole genome shotgun sequence	338500	339500	0.54	1.15	-0.61	53.6
NC_026501.1 Neurospora crassa OR74A linkage group I, whole genome shotgun sequence	339000	340000	0.6	1.3	-0.7	47.1
NC_026501.1 Neurospora crassa OR74A linkage group I, whole genome shotgun sequence	339500	340500	0.48	1.3	-0.82	48.4
NC_026501.1 Neurospora crassa OR74A linkage group I, whole genome shotgun sequence	340000	341000	0.4	1.15	-0.75	55.6
NC_026501.1 Neurospora crassa OR74A linkage group I, whole genome shotgun sequence	340500	341500	0.64	1.06	-0.43	60.9
NC_026501.1 Neurospora crassa OR74A linkage group I, whole genome shotgun sequence	341000	342000	0.65	0.96	-0.31	58.5
NC_026501.1 Neurospora crassa OR74A linkage group I, whole genome shotgun sequence	341500	342500	0.71	0.92	-0.21	55.2
NC_026501.1 Neurospora crassa OR74A linkage group I, whole genome shotgun sequence	342000	343000	1.04	0.96	0.07	36.3
NC_026501.1 Neurospora crassa OR74A linkage group I, whole genome shotgun sequence	342500	343500	0.82	1.12	-0.3	28.4
NC_026501.1 Neurospora crassa OR74A linkage group I, whole genome shotgun sequence	343000	344000	0.69	1.21	-0.52	41.8
NC_026501.1 Neurospora crassa OR74A linkage group I, whole genome shotgun sequence	343500	344500	0.62	1.22	-0.6	54.6
NC_026501.1 Neurospora crassa OR74A linkage group I, whole genome shotgun sequence	344000	345000	0.54	1.18	-0.64	57.5
NC_026501.1 Neurospora crassa OR74A linkage group I, whole genome shotgun sequence	344500	345500	0.57	1.21	-0.64	51.8
NC_026501.1 Neurospora crassa OR74A linkage group I, whole genome shotgun sequence	345000	346000	0.5	1.26	-0.76	47.8
NC_026501.1 Neurospora crassa OR74A linkage group I, whole genome shotgun sequence	345500	346500	0.51	1.18	-0.66	51.2
NC_026501.1 Neurospora crassa OR74A linkage group I, whole genome shotgun sequence	346000	347000	0.88	1.05	-0.17	45
NC_026501.1 Neurospora crassa OR74A linkage group I, whole genome shotgun sequence	346500	347500	0.94	1.08	-0.13	24.1
NC_026501.1 Neurospora crassa OR74A linkage group I, whole genome shotgun sequence	347000	348000	0.85	1.1	-0.26	20.9
NC_026501.1 Neurospora crassa OR74A linkage group I, whole genome shotgun sequence	347500	348500	1.03	1.15	-0.12	30.6
NC_026501.1 Neurospora crassa OR74A linkage group I, whole genome shotgun sequence	348000	349000	1.26	1.06	0.2	30.3
NC_026501.1 Neurospora crassa OR74A linkage group I, whole genome shotgun sequence	348500	349500	0.82	0.97	-0.16	37
NC_026501.1 Neurospora crassa OR74A linkage group I, whole genome shotgun sequence	349000	350000	0.7	1.13	-0.43	49.9
NC_026501.1 Neurospora crassa OR74A linkage group I, whole genome shotgun sequence	349500	350500	0.73	1.2	-0.46	51
NC_026501.1 Neurospora crassa OR74A linkage group I, whole genome shotgun sequence	350000	351000	0.64	1.17	-0.53	47.2
NC_026501.1 Neurospora crassa OR74A linkage group I, whole genome shotgun sequence	350500	351500	0.52	1.08	-0.56	47.4
NC_026501.1 Neurospora crassa OR74A linkage group I, whole genome shotgun sequence	351000	352000	0.41	1.12	-0.71	53.6
NC_026501.1 Neurospora crassa OR74A linkage group I, whole genome shotgun sequence	351500	352500	0.44	1.17	-0.73	52.4
NC_026501.1 Neurospora crassa OR74A linkage group I, whole genome shotgun sequence	352000	353000	0.52	0.99	-0.47	40.6
NC_026501.1 Neurospora crassa OR74A linkage group I, whole genome shotgun sequence	352500	353500	0.74	1.05	-0.31	40.8
NC_026501.1 Neurospora crassa OR74A linkage group I, whole genome shotgun sequence	353000	354000	0.75	1.23	-0.48	48
NC_026501.1 Neurospora crassa OR74A linkage group I, whole genome shotgun sequence	353500	354500	0.76	1.24	-0.48	46.5
NC_026501.1 Neurospora crassa OR74A linkage group I, whole genome shotgun sequence	354000	355000	0.75	1.21	-0.45	48.2
NC_026501.1 Neurospora crassa OR74A linkage group I, whole genome shotgun sequence	354500	355500	0.48	1.25	-0.77	49.7
NC_026501.1 Neurospora crassa OR74A linkage group I, whole genome shotgun sequence	355000	356000	0.44	1.22	-0.78	51.2
NC_026501.1 Neurospora crassa OR74A linkage group I, whole genome shotgun sequence	355500	356500	0.49	1.35	-0.86	49.9
NC_026501.1 Neurospora crassa OR74A linkage group I, whole genome shotgun sequence	356000	357000	0.46	1.39	-0.93	53.3
NC_026501.1 Neurospora crassa OR74A linkage group I, whole genome shotgun sequence	356500	357500	0.43	1.34	-0.91	56.7
NC_026501.1 Neurospora crassa OR74A linkage group I, whole genome shotgun sequence	357000	358000	0.54	1.3	-0.76	50
NC_026501.1 Neurospora crassa OR74A linkage group I, whole genome shotgun sequence	357500	358500	0.64	1.19	-0.55	46.8
NC_026501.1 Neurospora crassa OR74A linkage group I, whole genome shotgun sequence	358000	359000	0.43	1.21	-0.78	45.5
NC_026501.1 Neurospora crassa OR74A linkage group I, whole genome shotgun sequence	358500	359500	0.54	1.25	-0.71	47.3
NC_026501.1 Neurospora crassa OR74A linkage group I, whole genome shotgun sequence	359000	360000	0.68	1.28	-0.59	50.8
NC_026501.1 Neurospora crassa OR74A linkage group I, whole genome shotgun sequence	359500	360500	0.57	1.28	-0.72	49.5
NC_026501.1 Neurospora crassa OR74A linkage group I, whole genome shotgun sequence	360000	361000	0.52	1.38	-0.86	51.4
NC_026501.1 Neurospora crassa OR74A linkage group I, whole genome shotgun sequence	360500	361500	0.53	1.54	-1.02	51.7
NC_026501.1 Neurospora crassa OR74A linkage group I, whole genome shotgun sequence	361000	362000	0.79	1.27	-0.49	47.4
NC_026501.1 Neurospora crassa OR74A linkage group I, whole genome shotgun sequence	361500	362500	0.74	1.15	-0.41	40.9
NC_026501.1 Neurospora crassa OR74A linkage group I, whole genome shotgun sequence	362000	363000	0.68	1.2	-0.52	35.3
NC_026501.1 Neurospora crassa OR74A linkage group I, whole genome shotgun sequence	362500	363500	0.88	1.16	-0.28	28
NC_026501.1 Neurospora crassa OR74A linkage group I, whole genome shotgun sequence	363000	364000	0.54	1.23	-0.69	31
NC_026501.1 Neurospora crassa OR74A linkage group I, whole genome shotgun sequence	363500	364500	0.51	1.06	-0.55	45.9
NC_026501.1 Neurospora crassa OR74A linkage group I, whole genome shotgun sequence	364000	365000	0.82	1.05	-0.23	50.1
NC_026501.1 Neurospora crassa OR74A linkage group I, whole genome shotgun sequence	364500	365500	0.63	1.26	-0.64	45.7
NC_026501.1 Neurospora crassa OR74A linkage group I, whole genome shotgun sequence	365000	366000	0.49	1.4	-0.91	49
NC_026501.1 Neurospora crassa OR74A linkage group I, whole genome shotgun sequence	365500	366500	0.59	1.32	-0.73	54.3
NC_026501.1 Neurospora crassa OR74A linkage group I, whole genome shotgun sequence	366000	367000	0.59	1.33	-0.75	48
NC_026501.1 Neurospora crassa OR74A linkage group I, whole genome shotgun sequence	366500	367500	0.64	1.27	-0.63	47.8
NC_026501.1 Neurospora crassa OR74A linkage group I, whole genome shotgun sequence	367000	368000	0.86	1.11	-0.24	49.9
NC_026501.1 Neurospora crassa OR74A linkage group I, whole genome shotgun sequence	367500	368500	1	1.03	-0.03	49.4
NC_026501.1 Neurospora crassa OR74A linkage group I, whole genome shotgun sequence	368000	369000	0.63	1.12	-0.48	54.6
NC_026501.1 Neurospora crassa OR74A linkage group I, whole genome shotgun sequence	368500	369500	0.45	1.37	-0.92	51
NC_026501.1 Neurospora crassa OR74A linkage group I, whole genome shotgun sequence	369000	370000	0.52	1.25	-0.73	48.1
NC_026501.1 Neurospora crassa OR74A linkage group I, whole genome shotgun sequence	369500	370500	0.62	1.08	-0.46	51.2
NC_026501.1 Neurospora crassa OR74A linkage group I, whole genome shotgun sequence	370000	371000	0.68	1.27	-0.59	48.1
NC_026501.1 Neurospora crassa OR74A linkage group I, whole genome shotgun sequence	370500	371500	0.47	1.54	-1.07	46.3
NC_026501.1 Neurospora crassa OR74A linkage group I, whole genome shotgun sequence	371000	372000	0.61	1.32	-0.71	45.3
NC_026501.1 Neurospora crassa OR74A linkage group I, whole genome shotgun sequence	371500	372500	0.91	0.95	-0.04	40.6
NC_026501.1 Neurospora crassa OR74A linkage group I, whole genome shotgun sequence	372000	373000	0.89	1.05	-0.15	40.5
NC_026501.1 Neurospora crassa OR74A linkage group I, whole genome shotgun sequence	372500	373500	0.75	1.11	-0.35	46.9
NC_026501.1 Neurospora crassa OR74A linkage group I, whole genome shotgun sequence	373000	374000	0.69	1.11	-0.42	46.1
NC_026501.1 Neurospora crassa OR74A linkage group I, whole genome shotgun sequence	373500	374500	0.86	1.11	-0.25	38.5
NC_026501.1 Neurospora crassa OR74A linkage group I, whole genome shotgun sequence	374000	375000	1.29	1.04	0.24	39
NC_026501.1 Neurospora crassa OR74A linkage group I, whole genome shotgun sequence	374500	375500	1.09	1.08	0	44.1
NC_026501.1 Neurospora crassa OR74A linkage group I, whole genome shotgun sequence	375000	376000	0.74	1.08	-0.33	40.7
NC_026501.1 Neurospora crassa OR74A linkage group I, whole genome shotgun sequence	375500	376500	1	0.98	0.02	38.4
NC_026501.1 Neurospora crassa OR74A linkage group I, whole genome shotgun sequence	376000	377000	1.34	0.87	0.47	34.7
NC_026501.1 Neurospora crassa OR74A linkage group I, whole genome shotgun sequence	376500	377500	1.38	0.92	0.47	24.5
NC_026501.1 Neurospora crassa OR74A linkage group I, whole genome shotgun sequence	377000	378000	1.17	1.04	0.13	24.9
NC_026501.1 Neurospora crassa OR74A linkage group I, whole genome shotgun sequence	377500	378500	0.89	0.97	-0.08	38.3
NC_026501.1 Neurospora crassa OR74A linkage group I, whole genome shotgun sequence	378000	379000	0.8	0.9	-0.1	46
NC_026501.1 Neurospora crassa OR74A linkage group I, whole genome shotgun sequence	378500	379500	0.79	1.05	-0.26	48.8
NC_026501.1 Neurospora crassa OR74A linkage group I, whole genome shotgun sequence	379000	380000	0.79	1.01	-0.22	50.4
NC_026501.1 Neurospora crassa OR74A linkage group I, whole genome shotgun sequence	379500	380500	1	0.87	0.13	47.4
NC_026501.1 Neurospora crassa OR74A linkage group I, whole genome shotgun sequence	380000	381000	1.05	0.91	0.14	42.3
NC_026501.1 Neurospora crassa OR74A linkage group I, whole genome shotgun sequence	380500	381500	0.78	1.09	-0.32	39.8
NC_026501.1 Neurospora crassa OR74A linkage group I, whole genome shotgun sequence	381000	382000	0.65	1.34	-0.7	42.7
NC_026501.1 Neurospora crassa OR74A linkage group I, whole genome shotgun sequence	381500	382500	0.48	1.62	-1.14	50.5
NC_026501.1 Neurospora crassa OR74A linkage group I, whole genome shotgun sequence	382000	383000	0.45	1.4	-0.95	56.1
NC_026501.1 Neurospora crassa OR74A linkage group I, whole genome shotgun sequence	382500	383500	0.51	1.28	-0.77	54.1
NC_026501.1 Neurospora crassa OR74A linkage group I, whole genome shotgun sequence	383000	384000	0.65	1.11	-0.46	51
NC_026501.1 Neurospora crassa OR74A linkage group I, whole genome shotgun sequence	383500	384500	1.04	0.88	0.16	44.3
NC_026501.1 Neurospora crassa OR74A linkage group I, whole genome shotgun sequence	384000	385000	1.16	0.86	0.3	31.6
NC_026501.1 Neurospora crassa OR74A linkage group I, whole genome shotgun sequence	384500	385500	1.43	0.79	0.63	34.4
NC_026501.1 Neurospora crassa OR74A linkage group I, whole genome shotgun sequence	385000	386000	1.24	0.93	0.3	48
NC_026501.1 Neurospora crassa OR74A linkage group I, whole genome shotgun sequence	385500	386500	0.73	1.2	-0.47	44.7
NC_026501.1 Neurospora crassa OR74A linkage group I, whole genome shotgun sequence	386000	387000	0.7	1.25	-0.54	43
NC_026501.1 Neurospora crassa OR74A linkage group I, whole genome shotgun sequence	386500	387500	0.61	1.32	-0.71	43.6
NC_026501.1 Neurospora crassa OR74A linkage group I, whole genome shotgun sequence	387000	388000	0.73	1.18	-0.46	43.2
NC_026501.1 Neurospora crassa OR74A linkage group I, whole genome shotgun sequence	387500	388500	0.77	1.02	-0.25	49.7
NC_026501.1 Neurospora crassa OR74A linkage group I, whole genome shotgun sequence	388000	389000	0.49	1.16	-0.67	51.9
NC_026501.1 Neurospora crassa OR74A linkage group I, whole genome shotgun sequence	388500	389500	0.53	1.18	-0.65	49.2
NC_026501.1 Neurospora crassa OR74A linkage group I, whole genome shotgun sequence	389000	390000	0.69	1.21	-0.52	48
NC_026501.1 Neurospora crassa OR74A linkage group I, whole genome shotgun sequence	389500	390500	0.72	1.25	-0.53	47.1
NC_026501.1 Neurospora crassa OR74A linkage group I, whole genome shotgun sequence	390000	391000	0.63	1.33	-0.7	46.5
NC_026501.1 Neurospora crassa OR74A linkage group I, whole genome shotgun sequence	390500	391500	0.58	1.36	-0.78	48.8
NC_026501.1 Neurospora crassa OR74A linkage group I, whole genome shotgun sequence	391000	392000	0.73	1.26	-0.53	51.6
NC_026501.1 Neurospora crassa OR74A linkage group I, whole genome shotgun sequence	391500	392500	0.8	1.16	-0.36	49.9
NC_026501.1 Neurospora crassa OR74A linkage group I, whole genome shotgun sequence	392000	393000	0.7	1.21	-0.51	46.9
NC_026501.1 Neurospora crassa OR74A linkage group I, whole genome shotgun sequence	392500	393500	0.65	1.18	-0.53	46.8
NC_026501.1 Neurospora crassa OR74A linkage group I, whole genome shotgun sequence	393000	394000	0.54	1.21	-0.67	49.8
NC_026501.1 Neurospora crassa OR74A linkage group I, whole genome shotgun sequence	393500	394500	0.52	1.18	-0.65	53.4
NC_026501.1 Neurospora crassa OR74A linkage group I, whole genome shotgun sequence	394000	395000	0.76	0.99	-0.23	52.5
NC_026501.1 Neurospora crassa OR74A linkage group I, whole genome shotgun sequence	394500	395500	0.57	1.13	-0.56	49.9
NC_026501.1 Neurospora crassa OR74A linkage group I, whole genome shotgun sequence	395000	396000	0.51	1.32	-0.81	48.6
NC_026501.1 Neurospora crassa OR74A linkage group I, whole genome shotgun sequence	395500	396500	0.63	1.25	-0.62	46.4
NC_026501.1 Neurospora crassa OR74A linkage group I, whole genome shotgun sequence	396000	397000	0.64	1.19	-0.55	46.3
NC_026501.1 Neurospora crassa OR74A linkage group I, whole genome shotgun sequence	396500	397500	0.59	1.1	-0.5	46.8
NC_026501.1 Neurospora crassa OR74A linkage group I, whole genome shotgun sequence	397000	398000	0.71	1.09	-0.38	49
NC_026501.1 Neurospora crassa OR74A linkage group I, whole genome shotgun sequence	397500	398500	0.62	1.28	-0.67	53.4
NC_026501.1 Neurospora crassa OR74A linkage group I, whole genome shotgun sequence	398000	399000	0.43	1.57	-1.14	51.3
NC_026501.1 Neurospora crassa OR74A linkage group I, whole genome shotgun sequence	398500	399500	0.55	1.52	-0.97	46.3
NC_026501.1 Neurospora crassa OR74A linkage group I, whole genome shotgun sequence	399000	400000	0.63	1.21	-0.58	48.6
NC_026501.1 Neurospora crassa OR74A linkage group I, whole genome shotgun sequence	399500	400500	0.72	1.08	-0.36	52
NC_026501.1 Neurospora crassa OR74A linkage group I, whole genome shotgun sequence	400000	401000	0.87	1.09	-0.22	53.6
NC_026501.1 Neurospora crassa OR74A linkage group I, whole genome shotgun sequence	400500	401500	0.69	1.05	-0.35	55.2
NC_026501.1 Neurospora crassa OR74A linkage group I, whole genome shotgun sequence	401000	402000	0.64	1.08	-0.44	49
NC_026501.1 Neurospora crassa OR74A linkage group I, whole genome shotgun sequence	401500	402500	0.68	1.3	-0.62	35.5
NC_026501.1 Neurospora crassa OR74A linkage group I, whole genome shotgun sequence	402000	403000	0.57	1.29	-0.72	39.1
NC_026501.1 Neurospora crassa OR74A linkage group I, whole genome shotgun sequence	402500	403500	0.64	0.92	-0.29	52.5
NC_026501.1 Neurospora crassa OR74A linkage group I, whole genome shotgun sequence	403000	404000	0.42	0.95	-0.53	53.7
NC_026501.1 Neurospora crassa OR74A linkage group I, whole genome shotgun sequence	403500	404500	0.35	1.25	-0.9	53.5
NC_026501.1 Neurospora crassa OR74A linkage group I, whole genome shotgun sequence	404000	405000	0.62	1.29	-0.67	47.5
NC_026501.1 Neurospora crassa OR74A linkage group I, whole genome shotgun sequence	404500	405500	0.45	1.27	-0.82	46.9
NC_026501.1 Neurospora crassa OR74A linkage group I, whole genome shotgun sequence	405000	406000	0.49	1.15	-0.66	51.8
NC_026501.1 Neurospora crassa OR74A linkage group I, whole genome shotgun sequence	405500	406500	0.7	1.13	-0.42	47.4
NC_026501.1 Neurospora crassa OR74A linkage group I, whole genome shotgun sequence	406000	407000	0.63	1.2	-0.56	46.4
NC_026501.1 Neurospora crassa OR74A linkage group I, whole genome shotgun sequence	406500	407500	0.57	1.19	-0.62	45.1
NC_026501.1 Neurospora crassa OR74A linkage group I, whole genome shotgun sequence	407000	408000	0.7	1.14	-0.44	40.1
NC_026501.1 Neurospora crassa OR74A linkage group I, whole genome shotgun sequence	407500	408500	0.82	1.14	-0.32	40.2
NC_026501.1 Neurospora crassa OR74A linkage group I, whole genome shotgun sequence	408000	409000	0.82	1.18	-0.36	41.7
NC_026501.1 Neurospora crassa OR74A linkage group I, whole genome shotgun sequence	408500	409500	0.88	1.13	-0.25	39.5
NC_026501.1 Neurospora crassa OR74A linkage group I, whole genome shotgun sequence	409000	410000	0.77	1.14	-0.37	29.2
NC_026501.1 Neurospora crassa OR74A linkage group I, whole genome shotgun sequence	409500	410500	0.73	1.56	-0.83	28.1
NC_026501.1 Neurospora crassa OR74A linkage group I, whole genome shotgun sequence	410000	411000	0.81	1.59	-0.78	41.3
NC_026501.1 Neurospora crassa OR74A linkage group I, whole genome shotgun sequence	410500	411500	0.79	1.2	-0.41	38.6
NC_026501.1 Neurospora crassa OR74A linkage group I, whole genome shotgun sequence	411000	412000	0.71	1.08	-0.37	36.8
NC_026501.1 Neurospora crassa OR74A linkage group I, whole genome shotgun sequence	411500	412500	0.58	1.14	-0.56	48.7
NC_026501.1 Neurospora crassa OR74A linkage group I, whole genome shotgun sequence	412000	413000	0.53	1.08	-0.54	56.1
NC_026501.1 Neurospora crassa OR74A linkage group I, whole genome shotgun sequence	412500	413500	0.6	1.09	-0.49	57.8
NC_026501.1 Neurospora crassa OR74A linkage group I, whole genome shotgun sequence	413000	414000	0.39	1.24	-0.84	52.9
NC_026501.1 Neurospora crassa OR74A linkage group I, whole genome shotgun sequence	413500	414500	0.51	1.38	-0.87	45.7
NC_026501.1 Neurospora crassa OR74A linkage group I, whole genome shotgun sequence	414000	415000	0.73	1.45	-0.71	46.1
NC_026501.1 Neurospora crassa OR74A linkage group I, whole genome shotgun sequence	414500	415500	0.77	1.21	-0.44	44.7
NC_026501.1 Neurospora crassa OR74A linkage group I, whole genome shotgun sequence	415000	416000	0.6	1.19	-0.58	43.4
NC_026501.1 Neurospora crassa OR74A linkage group I, whole genome shotgun sequence	415500	416500	0.82	1.08	-0.26	44.6
NC_026501.1 Neurospora crassa OR74A linkage group I, whole genome shotgun sequence	416000	417000	0.89	1	-0.11	44.6
NC_026501.1 Neurospora crassa OR74A linkage group I, whole genome shotgun sequence	416500	417500	0.55	1.3	-0.75	49.6
NC_026501.1 Neurospora crassa OR74A linkage group I, whole genome shotgun sequence	417000	418000	0.51	1.27	-0.76	50.9
NC_026501.1 Neurospora crassa OR74A linkage group I, whole genome shotgun sequence	417500	418500	0.74	1.03	-0.29	51.1
NC_026501.1 Neurospora crassa OR74A linkage group I, whole genome shotgun sequence	418000	419000	0.64	1.1	-0.47	54.1
NC_026501.1 Neurospora crassa OR74A linkage group I, whole genome shotgun sequence	418500	419500	0.66	1.21	-0.56	50.1
NC_026501.1 Neurospora crassa OR74A linkage group I, whole genome shotgun sequence	419000	420000	0.85	1.15	-0.3	41.2
NC_026501.1 Neurospora crassa OR74A linkage group I, whole genome shotgun sequence	419500	420500	0.72	1.27	-0.55	44.3
NC_026501.1 Neurospora crassa OR74A linkage group I, whole genome shotgun sequence	420000	421000	0.62	1.1	-0.48	49.7
NC_026501.1 Neurospora crassa OR74A linkage group I, whole genome shotgun sequence	420500	421500	0.78	1	-0.22	46.8
NC_026501.1 Neurospora crassa OR74A linkage group I, whole genome shotgun sequence	421000	422000	0.96	1.09	-0.13	42.4
NC_026501.1 Neurospora crassa OR74A linkage group I, whole genome shotgun sequence	421500	422500	1.02	0.98	0.04	47.2
NC_026501.1 Neurospora crassa OR74A linkage group I, whole genome shotgun sequence	422000	423000	0.8	0.9	-0.1	56.9
NC_026501.1 Neurospora crassa OR74A linkage group I, whole genome shotgun sequence	422500	423500	0.75	0.93	-0.18	55.4
NC_026501.1 Neurospora crassa OR74A linkage group I, whole genome shotgun sequence	423000	424000	0.7	1.15	-0.45	48.7
NC_026501.1 Neurospora crassa OR74A linkage group I, whole genome shotgun sequence	423500	424500	0.79	1.2	-0.41	47.6
NC_026501.1 Neurospora crassa OR74A linkage group I, whole genome shotgun sequence	424000	425000	0.79	1.16	-0.37	47.2
NC_026501.1 Neurospora crassa OR74A linkage group I, whole genome shotgun sequence	424500	425500	0.69	1.06	-0.37	48.1
NC_026501.1 Neurospora crassa OR74A linkage group I, whole genome shotgun sequence	425000	426000	0.9	0.89	0.01	51.7
NC_026501.1 Neurospora crassa OR74A linkage group I, whole genome shotgun sequence	425500	426500	0.8	0.93	-0.13	52.6
NC_026501.1 Neurospora crassa OR74A linkage group I, whole genome shotgun sequence	426000	427000	0.52	1.06	-0.54	51.2
NC_026501.1 Neurospora crassa OR74A linkage group I, whole genome shotgun sequence	426500	427500	0.43	1.11	-0.68	46.5
NC_026501.1 Neurospora crassa OR74A linkage group I, whole genome shotgun sequence	427000	428000	0.47	1.13	-0.66	44.3
NC_026501.1 Neurospora crassa OR74A linkage group I, whole genome shotgun sequence	427500	428500	0.62	1.18	-0.57	36.3
NC_026501.1 Neurospora crassa OR74A linkage group I, whole genome shotgun sequence	428000	429000	0.88	1.19	-0.31	31.6
NC_026501.1 Neurospora crassa OR74A linkage group I, whole genome shotgun sequence	428500	429500	0.97	1.11	-0.14	35.7
NC_026501.1 Neurospora crassa OR74A linkage group I, whole genome shotgun sequence	429000	430000	0.91	1.2	-0.29	44.4
NC_026501.1 Neurospora crassa OR74A linkage group I, whole genome shotgun sequence	429500	430500	0.71	1.14	-0.43	55.8
NC_026501.1 Neurospora crassa OR74A linkage group I, whole genome shotgun sequence	430000	431000	0.92	0.9	0.02	51.4
NC_026501.1 Neurospora crassa OR74A linkage group I, whole genome shotgun sequence	430500	431500	0.94	1.02	-0.08	47.3
NC_026501.1 Neurospora crassa OR74A linkage group I, whole genome shotgun sequence	431000	432000	0.73	1.13	-0.4	47.7
NC_026501.1 Neurospora crassa OR74A linkage group I, whole genome shotgun sequence	431500	432500	0.68	1.11	-0.42	46
NC_026501.1 Neurospora crassa OR74A linkage group I, whole genome shotgun sequence	432000	433000	0.85	1.22	-0.36	50.7
NC_026501.1 Neurospora crassa OR74A linkage group I, whole genome shotgun sequence	432500	433500	0.78	1.08	-0.3	51.9
NC_026501.1 Neurospora crassa OR74A linkage group I, whole genome shotgun sequence	433000	434000	0.62	1.03	-0.4	44.7
NC_026501.1 Neurospora crassa OR74A linkage group I, whole genome shotgun sequence	433500	434500	0.59	1.19	-0.6	39.6
NC_026501.1 Neurospora crassa OR74A linkage group I, whole genome shotgun sequence	434000	435000	0.53	1.12	-0.59	36.3
NC_026501.1 Neurospora crassa OR74A linkage group I, whole genome shotgun sequence	434500	435500	0.7	1.14	-0.44	35
NC_026501.1 Neurospora crassa OR74A linkage group I, whole genome shotgun sequence	435000	436000	0.73	1.15	-0.42	38.4
NC_026501.1 Neurospora crassa OR74A linkage group I, whole genome shotgun sequence	435500	436500	0.63	1.17	-0.54	44
NC_026501.1 Neurospora crassa OR74A linkage group I, whole genome shotgun sequence	436000	437000	0.74	1.21	-0.47	45.8
NC_026501.1 Neurospora crassa OR74A linkage group I, whole genome shotgun sequence	436500	437500	0.78	1.07	-0.29	43.9
NC_026501.1 Neurospora crassa OR74A linkage group I, whole genome shotgun sequence	437000	438000	0.85	0.93	-0.08	43.2
NC_026501.1 Neurospora crassa OR74A linkage group I, whole genome shotgun sequence	437500	438500	0.9	0.95	-0.05	40.7
NC_026501.1 Neurospora crassa OR74A linkage group I, whole genome shotgun sequence	438000	439000	0.76	0.99	-0.23	45.8
NC_026501.1 Neurospora crassa OR74A linkage group I, whole genome shotgun sequence	438500	439500	0.69	0.99	-0.3	56.5
NC_026501.1 Neurospora crassa OR74A linkage group I, whole genome shotgun sequence	439000	440000	0.47	1.19	-0.73	56.6
NC_026501.1 Neurospora crassa OR74A linkage group I, whole genome shotgun sequence	439500	440500	0.58	1.17	-0.59	52.3
NC_026501.1 Neurospora crassa OR74A linkage group I, whole genome shotgun sequence	440000	441000	0.84	1.06	-0.22	50.7
NC_026501.1 Neurospora crassa OR74A linkage group I, whole genome shotgun sequence	440500	441500	0.7	1.17	-0.47	49.3
NC_026501.1 Neurospora crassa OR74A linkage group I, whole genome shotgun sequence	441000	442000	0.62	1.22	-0.6	45
NC_026501.1 Neurospora crassa OR74A linkage group I, whole genome shotgun sequence	441500	442500	0.78	1.08	-0.3	40.2
NC_026501.1 Neurospora crassa OR74A linkage group I, whole genome shotgun sequence	442000	443000	0.95	1.03	-0.08	35.2
NC_026501.1 Neurospora crassa OR74A linkage group I, whole genome shotgun sequence	442500	443500	0.81	1.13	-0.32	35.7
NC_026501.1 Neurospora crassa OR74A linkage group I, whole genome shotgun sequence	443000	444000	0.78	1.15	-0.36	42.8
NC_026501.1 Neurospora crassa OR74A linkage group I, whole genome shotgun sequence	443500	444500	0.68	1.21	-0.53	46.6
NC_026501.1 Neurospora crassa OR74A linkage group I, whole genome shotgun sequence	444000	445000	0.68	1.23	-0.54	46.1
NC_026501.1 Neurospora crassa OR74A linkage group I, whole genome shotgun sequence	444500	445500	0.81	1.12	-0.3	44.8
NC_026501.1 Neurospora crassa OR74A linkage group I, whole genome shotgun sequence	445000	446000	0.66	1.14	-0.48	46.8
NC_026501.1 Neurospora crassa OR74A linkage group I, whole genome shotgun sequence	445500	446500	0.65	1.17	-0.51	45
NC_026501.1 Neurospora crassa OR74A linkage group I, whole genome shotgun sequence	446000	447000	0.46	1.34	-0.87	48.2
NC_026501.1 Neurospora crassa OR74A linkage group I, whole genome shotgun sequence	446500	447500	0.42	1.39	-0.96	51
NC_026501.1 Neurospora crassa OR74A linkage group I, whole genome shotgun sequence	447000	448000	0.61	1.27	-0.66	49.5
NC_026501.1 Neurospora crassa OR74A linkage group I, whole genome shotgun sequence	447500	448500	0.81	1.21	-0.4	52.2
NC_026501.1 Neurospora crassa OR74A linkage group I, whole genome shotgun sequence	448000	449000	0.98	1.04	-0.06	52.1
NC_026501.1 Neurospora crassa OR74A linkage group I, whole genome shotgun sequence	448500	449500	0.72	1.21	-0.49	50.6
NC_026501.1 Neurospora crassa OR74A linkage group I, whole genome shotgun sequence	449000	450000	0.48	1.35	-0.87	50.6
NC_026501.1 Neurospora crassa OR74A linkage group I, whole genome shotgun sequence	449500	450500	0.51	1.28	-0.77	52.6
NC_026501.1 Neurospora crassa OR74A linkage group I, whole genome shotgun sequence	450000	451000	0.54	1.18	-0.64	54.4
NC_026501.1 Neurospora crassa OR74A linkage group I, whole genome shotgun sequence	450500	451500	0.68	1	-0.32	54.7
NC_026501.1 Neurospora crassa OR74A linkage group I, whole genome shotgun sequence	451000	452000	0.86	0.96	-0.1	46.1
NC_026501.1 Neurospora crassa OR74A linkage group I, whole genome shotgun sequence	451500	452500	1.11	0.89	0.22	40.9
NC_026501.1 Neurospora crassa OR74A linkage group I, whole genome shotgun sequence	452000	453000	0.96	1	-0.04	45.6
NC_026501.1 Neurospora crassa OR74A linkage group I, whole genome shotgun sequence	452500	453500	0.69	1.3	-0.61	45.1
NC_026501.1 Neurospora crassa OR74A linkage group I, whole genome shotgun sequence	453000	454000	0.72	1.41	-0.69	45.8
NC_026501.1 Neurospora crassa OR74A linkage group I, whole genome shotgun sequence	453500	454500	0.98	1.15	-0.17	52.9
NC_026501.1 Neurospora crassa OR74A linkage group I, whole genome shotgun sequence	454000	455000	0.78	1.26	-0.48	57.6
NC_026501.1 Neurospora crassa OR74A linkage group I, whole genome shotgun sequence	454500	455500	0.7	1.22	-0.52	52.1
NC_026501.1 Neurospora crassa OR74A linkage group I, whole genome shotgun sequence	455000	456000	0.94	0.97	-0.03	52.6
NC_026501.1 Neurospora crassa OR74A linkage group I, whole genome shotgun sequence	455500	456500	0.8	1.1	-0.29	52.8
NC_026501.1 Neurospora crassa OR74A linkage group I, whole genome shotgun sequence	456000	457000	0.69	1.23	-0.54	47.7
NC_026501.1 Neurospora crassa OR74A linkage group I, whole genome shotgun sequence	456500	457500	0.56	1.19	-0.62	52.3
NC_026501.1 Neurospora crassa OR74A linkage group I, whole genome shotgun sequence	457000	458000	0.67	1.04	-0.37	57.5
NC_026501.1 Neurospora crassa OR74A linkage group I, whole genome shotgun sequence	457500	458500	0.64	1.14	-0.5	60
NC_026501.1 Neurospora crassa OR74A linkage group I, whole genome shotgun sequence	458000	459000	0.69	1.22	-0.53	55.6
NC_026501.1 Neurospora crassa OR74A linkage group I, whole genome shotgun sequence	458500	459500	0.98	1.01	-0.03	50.9
NC_026501.1 Neurospora crassa OR74A linkage group I, whole genome shotgun sequence	459000	460000	0.86	1.09	-0.22	54.9
NC_026501.1 Neurospora crassa OR74A linkage group I, whole genome shotgun sequence	459500	460500	0.71	1.24	-0.53	55.1
NC_026501.1 Neurospora crassa OR74A linkage group I, whole genome shotgun sequence	460000	461000	0.78	1.21	-0.42	51.6
NC_026501.1 Neurospora crassa OR74A linkage group I, whole genome shotgun sequence	460500	461500	0.82	1.09	-0.27	55.1
NC_026501.1 Neurospora crassa OR74A linkage group I, whole genome shotgun sequence	461000	462000	0.79	1.11	-0.32	54.6
NC_026501.1 Neurospora crassa OR74A linkage group I, whole genome shotgun sequence	461500	462500	0.91	1.2	-0.29	41.8
NC_026501.1 Neurospora crassa OR74A linkage group I, whole genome shotgun sequence	462000	463000	0.96	1.06	-0.09	33.4
NC_026501.1 Neurospora crassa OR74A linkage group I, whole genome shotgun sequence	462500	463500	1.06	0.93	0.14	37.2
NC_026501.1 Neurospora crassa OR74A linkage group I, whole genome shotgun sequence	463000	464000	0.9	1.04	-0.14	39.3
NC_026501.1 Neurospora crassa OR74A linkage group I, whole genome shotgun sequence	463500	464500	0.6	1.3	-0.7	43.1
NC_026501.1 Neurospora crassa OR74A linkage group I, whole genome shotgun sequence	464000	465000	0.54	1.32	-0.78	50.5
NC_026501.1 Neurospora crassa OR74A linkage group I, whole genome shotgun sequence	464500	465500	0.53	1.11	-0.58	53.2
NC_026501.1 Neurospora crassa OR74A linkage group I, whole genome shotgun sequence	465000	466000	0.69	0.96	-0.27	55.3
NC_026501.1 Neurospora crassa OR74A linkage group I, whole genome shotgun sequence	465500	466500	0.68	1.03	-0.35	54.6
NC_026501.1 Neurospora crassa OR74A linkage group I, whole genome shotgun sequence	466000	467000	0.68	1.04	-0.36	46.9
NC_026501.1 Neurospora crassa OR74A linkage group I, whole genome shotgun sequence	466500	467500	0.84	1.08	-0.24	40.7
NC_026501.1 Neurospora crassa OR74A linkage group I, whole genome shotgun sequence	467000	468000	0.63	1.32	-0.69	36.1
NC_026501.1 Neurospora crassa OR74A linkage group I, whole genome shotgun sequence	467500	468500	0.53	1.14	-0.61	36.8
NC_026501.1 Neurospora crassa OR74A linkage group I, whole genome shotgun sequence	468000	469000	0.72	1.08	-0.36	40
NC_026501.1 Neurospora crassa OR74A linkage group I, whole genome shotgun sequence	468500	469500	0.41	1.11	-0.7	44.9
NC_026501.1 Neurospora crassa OR74A linkage group I, whole genome shotgun sequence	469000	470000	0.51	1.11	-0.6	45.7
NC_026501.1 Neurospora crassa OR74A linkage group I, whole genome shotgun sequence	469500	470500	0.68	1.22	-0.54	41.9
NC_026501.1 Neurospora crassa OR74A linkage group I, whole genome shotgun sequence	470000	471000	0.59	1.28	-0.68	45.1
NC_026501.1 Neurospora crassa OR74A linkage group I, whole genome shotgun sequence	470500	471500	0.48	1.29	-0.8	45.6
NC_026501.1 Neurospora crassa OR74A linkage group I, whole genome shotgun sequence	471000	472000	0.62	1.36	-0.74	43.4
NC_026501.1 Neurospora crassa OR74A linkage group I, whole genome shotgun sequence	471500	472500	0.64	1.34	-0.71	46.3
NC_026501.1 Neurospora crassa OR74A linkage group I, whole genome shotgun sequence	472000	473000	0.47	1.42	-0.95	51
NC_026501.1 Neurospora crassa OR74A linkage group I, whole genome shotgun sequence	472500	473500	0.53	1.39	-0.86	49.7
NC_026501.1 Neurospora crassa OR74A linkage group I, whole genome shotgun sequence	473000	474000	0.84	1.17	-0.33	46.9
NC_026501.1 Neurospora crassa OR74A linkage group I, whole genome shotgun sequence	473500	474500	0.75	1.18	-0.43	45.5
NC_026501.1 Neurospora crassa OR74A linkage group I, whole genome shotgun sequence	474000	475000	0.53	1.32	-0.79	50.3
NC_026501.1 Neurospora crassa OR74A linkage group I, whole genome shotgun sequence	474500	475500	0.46	1.37	-0.91	54.3
NC_026501.1 Neurospora crassa OR74A linkage group I, whole genome shotgun sequence	475000	476000	0.49	1.2	-0.71	53.7
NC_026501.1 Neurospora crassa OR74A linkage group I, whole genome shotgun sequence	475500	476500	0.6	1.22	-0.61	53.9
NC_026501.1 Neurospora crassa OR74A linkage group I, whole genome shotgun sequence	476000	477000	0.56	1.41	-0.85	53.9
NC_026501.1 Neurospora crassa OR74A linkage group I, whole genome shotgun sequence	476500	477500	0.48	1.42	-0.94	54
NC_026501.1 Neurospora crassa OR74A linkage group I, whole genome shotgun sequence	477000	478000	0.32	1.53	-1.2	55
NC_026501.1 Neurospora crassa OR74A linkage group I, whole genome shotgun sequence	477500	478500	0.54	1.44	-0.9	49.9
NC_026501.1 Neurospora crassa OR74A linkage group I, whole genome shotgun sequence	478000	479000	0.88	1.21	-0.33	40.7
NC_026501.1 Neurospora crassa OR74A linkage group I, whole genome shotgun sequence	478500	479500	0.95	1.17	-0.23	33.9
NC_026501.1 Neurospora crassa OR74A linkage group I, whole genome shotgun sequence	479000	480000	0.74	1.17	-0.43	36.2
NC_026501.1 Neurospora crassa OR74A linkage group I, whole genome shotgun sequence	479500	480500	0.63	1.32	-0.68	46.3
NC_026501.1 Neurospora crassa OR74A linkage group I, whole genome shotgun sequence	480000	481000	0.66	1.37	-0.7	48.6
NC_026501.1 Neurospora crassa OR74A linkage group I, whole genome shotgun sequence	480500	481500	0.7	1.21	-0.51	47.2
NC_026501.1 Neurospora crassa OR74A linkage group I, whole genome shotgun sequence	481000	482000	0.8	1.05	-0.25	47.8
NC_026501.1 Neurospora crassa OR74A linkage group I, whole genome shotgun sequence	481500	482500	0.88	1.06	-0.18	48.4
NC_026501.1 Neurospora crassa OR74A linkage group I, whole genome shotgun sequence	482000	483000	0.8	1.21	-0.42	47.6
NC_026501.1 Neurospora crassa OR74A linkage group I, whole genome shotgun sequence	482500	483500	0.9	1.14	-0.24	39.7
NC_026501.1 Neurospora crassa OR74A linkage group I, whole genome shotgun sequence	483000	484000	1.04	1.01	0.03	32.4
NC_026501.1 Neurospora crassa OR74A linkage group I, whole genome shotgun sequence	483500	484500	0.9	1.03	-0.12	35
NC_026501.1 Neurospora crassa OR74A linkage group I, whole genome shotgun sequence	484000	485000	0.84	1.02	-0.18	44.1
NC_026501.1 Neurospora crassa OR74A linkage group I, whole genome shotgun sequence	484500	485500	0.93	1.05	-0.12	48.8
NC_026501.1 Neurospora crassa OR74A linkage group I, whole genome shotgun sequence	485000	486000	0.89	1.1	-0.22	43.9
NC_026501.1 Neurospora crassa OR74A linkage group I, whole genome shotgun sequence	485500	486500	0.89	1.08	-0.18	39.1
NC_026501.1 Neurospora crassa OR74A linkage group I, whole genome shotgun sequence	486000	487000	0.9	1.06	-0.15	41.4
NC_026501.1 Neurospora crassa OR74A linkage group I, whole genome shotgun sequence	486500	487500	0.7	1.21	-0.5	47.3
NC_026501.1 Neurospora crassa OR74A linkage group I, whole genome shotgun sequence	487000	488000	0.74	1.21	-0.47	48.7
NC_026501.1 Neurospora crassa OR74A linkage group I, whole genome shotgun sequence	487500	488500	0.7	1.22	-0.52	48.2
NC_026501.1 Neurospora crassa OR74A linkage group I, whole genome shotgun sequence	488000	489000	0.67	1.23	-0.56	49.5
NC_026501.1 Neurospora crassa OR74A linkage group I, whole genome shotgun sequence	488500	489500	0.8	1.17	-0.37	49
NC_026501.1 Neurospora crassa OR74A linkage group I, whole genome shotgun sequence	489000	490000	0.6	1.31	-0.71	47.3
NC_026501.1 Neurospora crassa OR74A linkage group I, whole genome shotgun sequence	489500	490500	0.56	1.49	-0.93	47.5
NC_026501.1 Neurospora crassa OR74A linkage group I, whole genome shotgun sequence	490000	491000	0.65	1.45	-0.8	44.8
NC_026501.1 Neurospora crassa OR74A linkage group I, whole genome shotgun sequence	490500	491500	0.83	1.22	-0.39	43.6
NC_026501.1 Neurospora crassa OR74A linkage group I, whole genome shotgun sequence	491000	492000	0.88	1.17	-0.29	43.4
NC_026501.1 Neurospora crassa OR74A linkage group I, whole genome shotgun sequence	491500	492500	0.7	1.17	-0.47	49.7
NC_026501.1 Neurospora crassa OR74A linkage group I, whole genome shotgun sequence	492000	493000	0.74	1.18	-0.45	58.6
NC_026501.1 Neurospora crassa OR74A linkage group I, whole genome shotgun sequence	492500	493500	0.86	1.1	-0.24	56.9
NC_026501.1 Neurospora crassa OR74A linkage group I, whole genome shotgun sequence	493000	494000	0.68	1.09	-0.41	52.5
NC_026501.1 Neurospora crassa OR74A linkage group I, whole genome shotgun sequence	493500	494500	0.56	1.33	-0.78	48
NC_026501.1 Neurospora crassa OR74A linkage group I, whole genome shotgun sequence	494000	495000	0.79	1.18	-0.39	44.4
NC_026501.1 Neurospora crassa OR74A linkage group I, whole genome shotgun sequence	494500	495500	0.83	1.21	-0.37	47.9
NC_026501.1 Neurospora crassa OR74A linkage group I, whole genome shotgun sequence	495000	496000	0.45	1.32	-0.86	50.6
NC_026501.1 Neurospora crassa OR74A linkage group I, whole genome shotgun sequence	495500	496500	0.47	1.18	-0.71	48.5
NC_026501.1 Neurospora crassa OR74A linkage group I, whole genome shotgun sequence	496000	497000	0.46	1.29	-0.83	50.1
NC_026501.1 Neurospora crassa OR74A linkage group I, whole genome shotgun sequence	496500	497500	0.6	1.3	-0.7	52.7
NC_026501.1 Neurospora crassa OR74A linkage group I, whole genome shotgun sequence	497000	498000	0.55	1.3	-0.76	50.2
NC_026501.1 Neurospora crassa OR74A linkage group I, whole genome shotgun sequence	497500	498500	0.54	1.33	-0.79	44.3
NC_026501.1 Neurospora crassa OR74A linkage group I, whole genome shotgun sequence	498000	499000	0.76	1.17	-0.42	45.6
NC_026501.1 Neurospora crassa OR74A linkage group I, whole genome shotgun sequence	498500	499500	0.87	1.17	-0.3	49.1
NC_026501.1 Neurospora crassa OR74A linkage group I, whole genome shotgun sequence	499000	500000	0.73	1.26	-0.52	50
NC_026501.1 Neurospora crassa OR74A linkage group I, whole genome shotgun sequence	499500	500500	0.51	1.23	-0.72	50.4
NC_026501.1 Neurospora crassa OR74A linkage group I, whole genome shotgun sequence	500000	501000	0.58	1.19	-0.61	47.2
NC_026501.1 Neurospora crassa OR74A linkage group I, whole genome shotgun sequence	500500	501500	0.75	1.12	-0.37	50.1
NC_026501.1 Neurospora crassa OR74A linkage group I, whole genome shotgun sequence	501000	502000	0.82	1.15	-0.33	52.7
NC_026501.1 Neurospora crassa OR74A linkage group I, whole genome shotgun sequence	501500	502500	0.7	1.43	-0.73	49.8
NC_026501.1 Neurospora crassa OR74A linkage group I, whole genome shotgun sequence	502000	503000	0.53	1.59	-1.05	51.1
NC_026501.1 Neurospora crassa OR74A linkage group I, whole genome shotgun sequence	502500	503500	0.27	1.62	-1.36	53.5
NC_026501.1 Neurospora crassa OR74A linkage group I, whole genome shotgun sequence	503000	504000	0.43	1.26	-0.82	53.8
NC_026501.1 Neurospora crassa OR74A linkage group I, whole genome shotgun sequence	503500	504500	0.76	1	-0.24	53.7
NC_026501.1 Neurospora crassa OR74A linkage group I, whole genome shotgun sequence	504000	505000	0.68	1.08	-0.41	53.1
NC_026501.1 Neurospora crassa OR74A linkage group I, whole genome shotgun sequence	504500	505500	0.88	0.91	-0.02	47
NC_026501.1 Neurospora crassa OR74A linkage group I, whole genome shotgun sequence	505000	506000	1	0.82	0.18	37.3
NC_026501.1 Neurospora crassa OR74A linkage group I, whole genome shotgun sequence	505500	506500	0.84	1.01	-0.17	35.2
NC_026501.1 Neurospora crassa OR74A linkage group I, whole genome shotgun sequence	506000	507000	1.03	0.99	0.04	32.6
NC_026501.1 Neurospora crassa OR74A linkage group I, whole genome shotgun sequence	506500	507500	0.74	1.01	-0.27	36.8
NC_026501.1 Neurospora crassa OR74A linkage group I, whole genome shotgun sequence	507000	508000	0.56	1.25	-0.69	47.3
NC_026501.1 Neurospora crassa OR74A linkage group I, whole genome shotgun sequence	507500	508500	0.67	1.28	-0.62	48.8
NC_026501.1 Neurospora crassa OR74A linkage group I, whole genome shotgun sequence	508000	509000	0.69	1.28	-0.6	49.7
NC_026501.1 Neurospora crassa OR74A linkage group I, whole genome shotgun sequence	508500	509500	0.67	1.32	-0.65	45
NC_026501.1 Neurospora crassa OR74A linkage group I, whole genome shotgun sequence	509000	510000	0.57	1.53	-0.95	40.7
NC_026501.1 Neurospora crassa OR74A linkage group I, whole genome shotgun sequence	509500	510500	0.63	1.35	-0.72	43.7
NC_026501.1 Neurospora crassa OR74A linkage group I, whole genome shotgun sequence	510000	511000	0.79	1.09	-0.31	47
NC_026501.1 Neurospora crassa OR74A linkage group I, whole genome shotgun sequence	510500	511500	1.05	0.97	0.09	47.3
NC_026501.1 Neurospora crassa OR74A linkage group I, whole genome shotgun sequence	511000	512000	1.15	0.97	0.18	42.1
NC_026501.1 Neurospora crassa OR74A linkage group I, whole genome shotgun sequence	511500	512500	0.77	1.28	-0.52	42.3
NC_026501.1 Neurospora crassa OR74A linkage group I, whole genome shotgun sequence	512000	513000	0.62	1.35	-0.72	46.8
NC_026501.1 Neurospora crassa OR74A linkage group I, whole genome shotgun sequence	512500	513500	0.52	1.35	-0.82	53.1
NC_026501.1 Neurospora crassa OR74A linkage group I, whole genome shotgun sequence	513000	514000	0.56	1.28	-0.73	56.1
NC_026501.1 Neurospora crassa OR74A linkage group I, whole genome shotgun sequence	513500	514500	0.56	1.34	-0.78	50.8
NC_026501.1 Neurospora crassa OR74A linkage group I, whole genome shotgun sequence	514000	515000	0.49	1.57	-1.08	43.6
NC_026501.1 Neurospora crassa OR74A linkage group I, whole genome shotgun sequence	514500	515500	0.5	1.65	-1.15	41.6
NC_026501.1 Neurospora crassa OR74A linkage group I, whole genome shotgun sequence	515000	516000	0.44	1.81	-1.37	48.9
NC_026501.1 Neurospora crassa OR74A linkage group I, whole genome shotgun sequence	515500	516500	0.62	1.37	-0.75	54.2
NC_026501.1 Neurospora crassa OR74A linkage group I, whole genome shotgun sequence	516000	517000	0.71	1.22	-0.51	53.9
NC_026501.1 Neurospora crassa OR74A linkage group I, whole genome shotgun sequence	516500	517500	0.51	1.45	-0.94	54.8
NC_026501.1 Neurospora crassa OR74A linkage group I, whole genome shotgun sequence	517000	518000	0.57	1.5	-0.93	54.4
NC_026501.1 Neurospora crassa OR74A linkage group I, whole genome shotgun sequence	517500	518500	0.55	1.28	-0.73	50.8
NC_026501.1 Neurospora crassa OR74A linkage group I, whole genome shotgun sequence	518000	519000	0.69	1.08	-0.4	46.7
NC_026501.1 Neurospora crassa OR74A linkage group I, whole genome shotgun sequence	518500	519500	0.76	1.09	-0.34	47.4
NC_026501.1 Neurospora crassa OR74A linkage group I, whole genome shotgun sequence	519000	520000	0.84	1.01	-0.17	51.1
NC_026501.1 Neurospora crassa OR74A linkage group I, whole genome shotgun sequence	519500	520500	0.93	1.05	-0.12	54.9
NC_026501.1 Neurospora crassa OR74A linkage group I, whole genome shotgun sequence	520000	521000	0.67	1.21	-0.54	52.1
NC_026501.1 Neurospora crassa OR74A linkage group I, whole genome shotgun sequence	520500	521500	0.62	1.23	-0.61	47.1
NC_026501.1 Neurospora crassa OR74A linkage group I, whole genome shotgun sequence	521000	522000	0.68	1.26	-0.58	45.1
NC_026501.1 Neurospora crassa OR74A linkage group I, whole genome shotgun sequence	521500	522500	0.8	1.15	-0.35	44.2
NC_026501.1 Neurospora crassa OR74A linkage group I, whole genome shotgun sequence	522000	523000	1.03	1	0.03	48.1
NC_026501.1 Neurospora crassa OR74A linkage group I, whole genome shotgun sequence	522500	523500	0.71	1.18	-0.47	50.1
NC_026501.1 Neurospora crassa OR74A linkage group I, whole genome shotgun sequence	523000	524000	0.63	1.17	-0.54	45
NC_026501.1 Neurospora crassa OR74A linkage group I, whole genome shotgun sequence	523500	524500	0.98	0.87	0.1	40.2
NC_026501.1 Neurospora crassa OR74A linkage group I, whole genome shotgun sequence	524000	525000	1	0.85	0.15	38
NC_026501.1 Neurospora crassa OR74A linkage group I, whole genome shotgun sequence	524500	525500	0.85	0.96	-0.11	38.9
NC_026501.1 Neurospora crassa OR74A linkage group I, whole genome shotgun sequence	525000	526000	0.84	1.12	-0.28	40.4
NC_026501.1 Neurospora crassa OR74A linkage group I, whole genome shotgun sequence	525500	526500	0.85	1.13	-0.27	43.6
NC_026501.1 Neurospora crassa OR74A linkage group I, whole genome shotgun sequence	526000	527000	0.85	1.05	-0.2	48.2
NC_026501.1 Neurospora crassa OR74A linkage group I, whole genome shotgun sequence	526500	527500	0.81	1.11	-0.3	45.5
NC_026501.1 Neurospora crassa OR74A linkage group I, whole genome shotgun sequence	527000	528000	0.71	1.25	-0.54	44
NC_026501.1 Neurospora crassa OR74A linkage group I, whole genome shotgun sequence	527500	528500	0.42	1.27	-0.85	50.7
NC_026501.1 Neurospora crassa OR74A linkage group I, whole genome shotgun sequence	528000	529000	0.23	1.27	-1.04	48.4
NC_026501.1 Neurospora crassa OR74A linkage group I, whole genome shotgun sequence	528500	529500	0.49	1.36	-0.87	41
NC_026501.1 Neurospora crassa OR74A linkage group I, whole genome shotgun sequence	529000	530000	0.53	1.54	-1	44.8
NC_026501.1 Neurospora crassa OR74A linkage group I, whole genome shotgun sequence	529500	530500	0.77	1.27	-0.5	48.9
NC_026501.1 Neurospora crassa OR74A linkage group I, whole genome shotgun sequence	530000	531000	1.06	0.99	0.07	49.7
NC_026501.1 Neurospora crassa OR74A linkage group I, whole genome shotgun sequence	530500	531500	0.68	1.11	-0.43	48.4
NC_026501.1 Neurospora crassa OR74A linkage group I, whole genome shotgun sequence	531000	532000	0.69	1.24	-0.55	50.6
NC_026501.1 Neurospora crassa OR74A linkage group I, whole genome shotgun sequence	531500	532500	0.62	1.23	-0.61	52.4
NC_026501.1 Neurospora crassa OR74A linkage group I, whole genome shotgun sequence	532000	533000	0.54	1.16	-0.62	48.1
NC_026501.1 Neurospora crassa OR74A linkage group I, whole genome shotgun sequence	532500	533500	0.78	1.16	-0.38	37.2
NC_026501.1 Neurospora crassa OR74A linkage group I, whole genome shotgun sequence	533000	534000	0.89	1.11	-0.22	36.2
NC_026501.1 Neurospora crassa OR74A linkage group I, whole genome shotgun sequence	533500	534500	0.87	1.04	-0.17	39.3
NC_026501.1 Neurospora crassa OR74A linkage group I, whole genome shotgun sequence	534000	535000	0.8	1.05	-0.25	40.8
NC_026501.1 Neurospora crassa OR74A linkage group I, whole genome shotgun sequence	534500	535500	0.59	1.25	-0.65	49
NC_026501.1 Neurospora crassa OR74A linkage group I, whole genome shotgun sequence	535000	536000	0.43	1.38	-0.95	53.5
NC_026501.1 Neurospora crassa OR74A linkage group I, whole genome shotgun sequence	535500	536500	0.61	1.23	-0.62	49.5
NC_026501.1 Neurospora crassa OR74A linkage group I, whole genome shotgun sequence	536000	537000	0.68	1.04	-0.35	49.9
NC_026501.1 Neurospora crassa OR74A linkage group I, whole genome shotgun sequence	536500	537500	0.52	1.12	-0.6	50.5
NC_026501.1 Neurospora crassa OR74A linkage group I, whole genome shotgun sequence	537000	538000	0.7	1.18	-0.49	48.2
NC_026501.1 Neurospora crassa OR74A linkage group I, whole genome shotgun sequence	537500	538500	0.78	1.12	-0.35	53.9
NC_026501.1 Neurospora crassa OR74A linkage group I, whole genome shotgun sequence	538000	539000	0.55	1.31	-0.76	51.9
NC_026501.1 Neurospora crassa OR74A linkage group I, whole genome shotgun sequence	538500	539500	0.6	1.34	-0.74	46.3
NC_026501.1 Neurospora crassa OR74A linkage group I, whole genome shotgun sequence	539000	540000	0.69	1.09	-0.4	47.6
NC_026501.1 Neurospora crassa OR74A linkage group I, whole genome shotgun sequence	539500	540500	0.71	1.1	-0.38	50.9
NC_026501.1 Neurospora crassa OR74A linkage group I, whole genome shotgun sequence	540000	541000	0.75	1.19	-0.44	53.5
NC_026501.1 Neurospora crassa OR74A linkage group I, whole genome shotgun sequence	540500	541500	0.73	1.25	-0.52	51.5
NC_026501.1 Neurospora crassa OR74A linkage group I, whole genome shotgun sequence	541000	542000	0.69	1.31	-0.62	47.7
NC_026501.1 Neurospora crassa OR74A linkage group I, whole genome shotgun sequence	541500	542500	0.64	1.26	-0.62	50
NC_026501.1 Neurospora crassa OR74A linkage group I, whole genome shotgun sequence	542000	543000	0.49	1.38	-0.88	53.7
NC_026501.1 Neurospora crassa OR74A linkage group I, whole genome shotgun sequence	542500	543500	0.56	1.48	-0.91	51.9
NC_026501.1 Neurospora crassa OR74A linkage group I, whole genome shotgun sequence	543000	544000	0.82	1.29	-0.47	50.5
NC_026501.1 Neurospora crassa OR74A linkage group I, whole genome shotgun sequence	543500	544500	0.71	1.22	-0.5	50.4
NC_026501.1 Neurospora crassa OR74A linkage group I, whole genome shotgun sequence	544000	545000	0.49	1.42	-0.93	49
NC_026501.1 Neurospora crassa OR74A linkage group I, whole genome shotgun sequence	544500	545500	0.67	1.44	-0.77	48.8
NC_026501.1 Neurospora crassa OR74A linkage group I, whole genome shotgun sequence	545000	546000	0.82	1.31	-0.5	47.7
NC_026501.1 Neurospora crassa OR74A linkage group I, whole genome shotgun sequence	545500	546500	0.75	1.21	-0.46	46.1
NC_026501.1 Neurospora crassa OR74A linkage group I, whole genome shotgun sequence	546000	547000	0.73	1.15	-0.41	43.2
NC_026501.1 Neurospora crassa OR74A linkage group I, whole genome shotgun sequence	546500	547500	0.74	1.08	-0.33	43.4
NC_026501.1 Neurospora crassa OR74A linkage group I, whole genome shotgun sequence	547000	548000	0.7	1.09	-0.39	42.8
NC_026501.1 Neurospora crassa OR74A linkage group I, whole genome shotgun sequence	547500	548500	0.68	1.05	-0.37	36.8
NC_026501.1 Neurospora crassa OR74A linkage group I, whole genome shotgun sequence	548000	549000	0.58	1.08	-0.5	37.2
NC_026501.1 Neurospora crassa OR74A linkage group I, whole genome shotgun sequence	548500	549500	0.62	1.32	-0.7	44.5
NC_026501.1 Neurospora crassa OR74A linkage group I, whole genome shotgun sequence	549000	550000	0.71	1.23	-0.53	48.1
NC_026501.1 Neurospora crassa OR74A linkage group I, whole genome shotgun sequence	549500	550500	0.63	1.22	-0.59	49
NC_026501.1 Neurospora crassa OR74A linkage group I, whole genome shotgun sequence	550000	551000	0.54	1.39	-0.86	50.6
NC_026501.1 Neurospora crassa OR74A linkage group I, whole genome shotgun sequence	550500	551500	0.61	1.32	-0.71	49.9
NC_026501.1 Neurospora crassa OR74A linkage group I, whole genome shotgun sequence	551000	552000	0.67	1.23	-0.56	49.6
NC_026501.1 Neurospora crassa OR74A linkage group I, whole genome shotgun sequence	551500	552500	0.47	1.28	-0.81	49.7
NC_026501.1 Neurospora crassa OR74A linkage group I, whole genome shotgun sequence	552000	553000	0.51	1.14	-0.62	48
NC_026501.1 Neurospora crassa OR74A linkage group I, whole genome shotgun sequence	552500	553500	0.89	1.03	-0.14	48.7
NC_026501.1 Neurospora crassa OR74A linkage group I, whole genome shotgun sequence	553000	554000	0.73	1.18	-0.45	48.9
NC_026501.1 Neurospora crassa OR74A linkage group I, whole genome shotgun sequence	553500	554500	0.62	1.33	-0.7	48
NC_026501.1 Neurospora crassa OR74A linkage group I, whole genome shotgun sequence	554000	555000	0.58	1.43	-0.85	51.1
NC_026501.1 Neurospora crassa OR74A linkage group I, whole genome shotgun sequence	554500	555500	0.61	1.54	-0.93	50.1
NC_026501.1 Neurospora crassa OR74A linkage group I, whole genome shotgun sequence	555000	556000	0.76	1.34	-0.58	52.8
NC_026501.1 Neurospora crassa OR74A linkage group I, whole genome shotgun sequence	555500	556500	0.8	1.24	-0.43	50.4
NC_026501.1 Neurospora crassa OR74A linkage group I, whole genome shotgun sequence	556000	557000	0.62	1.27	-0.64	45
NC_026501.1 Neurospora crassa OR74A linkage group I, whole genome shotgun sequence	556500	557500	0.69	1.03	-0.34	50.9
NC_026501.1 Neurospora crassa OR74A linkage group I, whole genome shotgun sequence	557000	558000	0.9	0.98	-0.08	50.2
NC_026501.1 Neurospora crassa OR74A linkage group I, whole genome shotgun sequence	557500	558500	0.67	1.19	-0.53	45
NC_026501.1 Neurospora crassa OR74A linkage group I, whole genome shotgun sequence	558000	559000	0.94	1	-0.06	39.3
NC_026501.1 Neurospora crassa OR74A linkage group I, whole genome shotgun sequence	558500	559500	1.74	0.84	0.89	29.7
NC_026501.1 Neurospora crassa OR74A linkage group I, whole genome shotgun sequence	559000	560000	1	1.18	-0.18	33.1
NC_026501.1 Neurospora crassa OR74A linkage group I, whole genome shotgun sequence	559500	560500	0.74	0.99	-0.25	41.5
NC_026501.1 Neurospora crassa OR74A linkage group I, whole genome shotgun sequence	560000	561000	0.73	0.98	-0.25	43.6
NC_026501.1 Neurospora crassa OR74A linkage group I, whole genome shotgun sequence	560500	561500	0.54	1.24	-0.7	53.5
NC_026501.1 Neurospora crassa OR74A linkage group I, whole genome shotgun sequence	561000	562000	0.49	1.19	-0.7	58
NC_026501.1 Neurospora crassa OR74A linkage group I, whole genome shotgun sequence	561500	562500	0.64	1.09	-0.44	57
NC_026501.1 Neurospora crassa OR74A linkage group I, whole genome shotgun sequence	562000	563000	0.57	1.3	-0.73	55.3
NC_026501.1 Neurospora crassa OR74A linkage group I, whole genome shotgun sequence	562500	563500	0.52	1.45	-0.93	48.8
NC_026501.1 Neurospora crassa OR74A linkage group I, whole genome shotgun sequence	563000	564000	0.63	1.26	-0.63	46.9
NC_026501.1 Neurospora crassa OR74A linkage group I, whole genome shotgun sequence	563500	564500	0.71	1.26	-0.54	46.7
NC_026501.1 Neurospora crassa OR74A linkage group I, whole genome shotgun sequence	564000	565000	0.75	1.16	-0.41	46.8
NC_026501.1 Neurospora crassa OR74A linkage group I, whole genome shotgun sequence	564500	565500	0.69	1.02	-0.32	52.3
NC_026501.1 Neurospora crassa OR74A linkage group I, whole genome shotgun sequence	565000	566000	0.57	1.14	-0.57	52.7
NC_026501.1 Neurospora crassa OR74A linkage group I, whole genome shotgun sequence	565500	566500	0.59	1.21	-0.62	44.5
NC_026501.1 Neurospora crassa OR74A linkage group I, whole genome shotgun sequence	566000	567000	0.67	0.98	-0.31	43.6
NC_026501.1 Neurospora crassa OR74A linkage group I, whole genome shotgun sequence	566500	567500	0.69	0.96	-0.27	44
NC_026501.1 Neurospora crassa OR74A linkage group I, whole genome shotgun sequence	567000	568000	0.71	1.17	-0.46	42.8
NC_026501.1 Neurospora crassa OR74A linkage group I, whole genome shotgun sequence	567500	568500	0.76	1.15	-0.39	46.2
NC_026501.1 Neurospora crassa OR74A linkage group I, whole genome shotgun sequence	568000	569000	0.76	0.99	-0.23	48.4
NC_026501.1 Neurospora crassa OR74A linkage group I, whole genome shotgun sequence	568500	569500	0.9	0.87	0.03	40.5
NC_026501.1 Neurospora crassa OR74A linkage group I, whole genome shotgun sequence	569000	570000	0.89	0.92	-0.03	34.9
NC_026501.1 Neurospora crassa OR74A linkage group I, whole genome shotgun sequence	569500	570500	0.6	1.14	-0.54	41.2
NC_026501.1 Neurospora crassa OR74A linkage group I, whole genome shotgun sequence	570000	571000	0.58	1.4	-0.82	40.4
NC_026501.1 Neurospora crassa OR74A linkage group I, whole genome shotgun sequence	570500	571500	0.52	1.38	-0.85	42.6
NC_026501.1 Neurospora crassa OR74A linkage group I, whole genome shotgun sequence	571000	572000	0.54	1.25	-0.71	50.7
NC_026501.1 Neurospora crassa OR74A linkage group I, whole genome shotgun sequence	571500	572500	0.74	1.33	-0.59	53.2
NC_026501.1 Neurospora crassa OR74A linkage group I, whole genome shotgun sequence	572000	573000	0.67	1.36	-0.7	52.9
NC_026501.1 Neurospora crassa OR74A linkage group I, whole genome shotgun sequence	572500	573500	0.51	1.32	-0.81	52.2
NC_026501.1 Neurospora crassa OR74A linkage group I, whole genome shotgun sequence	573000	574000	0.57	1.23	-0.65	49.3
NC_026501.1 Neurospora crassa OR74A linkage group I, whole genome shotgun sequence	573500	574500	0.71	1.28	-0.57	47.6
NC_026501.1 Neurospora crassa OR74A linkage group I, whole genome shotgun sequence	574000	575000	0.64	1.21	-0.57	46
NC_026501.1 Neurospora crassa OR74A linkage group I, whole genome shotgun sequence	574500	575500	0.55	1.05	-0.5	41.2
NC_026501.1 Neurospora crassa OR74A linkage group I, whole genome shotgun sequence	575000	576000	0.56	1.26	-0.71	39.4
NC_026501.1 Neurospora crassa OR74A linkage group I, whole genome shotgun sequence	575500	576500	0.69	1.22	-0.53	42.6
NC_026501.1 Neurospora crassa OR74A linkage group I, whole genome shotgun sequence	576000	577000	0.59	1.03	-0.43	53.4
NC_026501.1 Neurospora crassa OR74A linkage group I, whole genome shotgun sequence	576500	577500	0.45	1.13	-0.68	62.6
NC_026501.1 Neurospora crassa OR74A linkage group I, whole genome shotgun sequence	577000	578000	0.47	1.43	-0.96	51.8
NC_026501.1 Neurospora crassa OR74A linkage group I, whole genome shotgun sequence	577500	578500	0.59	1.22	-0.63	45.1
NC_026501.1 Neurospora crassa OR74A linkage group I, whole genome shotgun sequence	578000	579000	0.75	1.01	-0.25	49.8
NC_026501.1 Neurospora crassa OR74A linkage group I, whole genome shotgun sequence	578500	579500	0.69	1.27	-0.58	48.2
NC_026501.1 Neurospora crassa OR74A linkage group I, whole genome shotgun sequence	579000	580000	1	1.13	-0.13	50.7
NC_026501.1 Neurospora crassa OR74A linkage group I, whole genome shotgun sequence	579500	580500	1.37	0.88	0.49	54.5
NC_026501.1 Neurospora crassa OR74A linkage group I, whole genome shotgun sequence	580000	581000	0.97	1.04	-0.07	58.7
NC_026501.1 Neurospora crassa OR74A linkage group I, whole genome shotgun sequence	580500	581500	0.6	1.23	-0.63	55.8
NC_026501.1 Neurospora crassa OR74A linkage group I, whole genome shotgun sequence	581000	582000	0.8	1.2	-0.4	49.4
NC_026501.1 Neurospora crassa OR74A linkage group I, whole genome shotgun sequence	581500	582500	0.66	1.18	-0.52	49.4
NC_026501.1 Neurospora crassa OR74A linkage group I, whole genome shotgun sequence	582000	583000	0.47	1.15	-0.68	52.8
NC_026501.1 Neurospora crassa OR74A linkage group I, whole genome shotgun sequence	582500	583500	0.52	1.12	-0.6	54.6
NC_026501.1 Neurospora crassa OR74A linkage group I, whole genome shotgun sequence	583000	584000	0.59	1.19	-0.61	46.7
NC_026501.1 Neurospora crassa OR74A linkage group I, whole genome shotgun sequence	583500	584500	0.54	1.32	-0.77	39.2
NC_026501.1 Neurospora crassa OR74A linkage group I, whole genome shotgun sequence	584000	585000	0.52	1.34	-0.82	38.2
NC_026501.1 Neurospora crassa OR74A linkage group I, whole genome shotgun sequence	584500	585500	0.62	1.24	-0.62	39.2
NC_026501.1 Neurospora crassa OR74A linkage group I, whole genome shotgun sequence	585000	586000	0.6	1.22	-0.62	43.2
NC_026501.1 Neurospora crassa OR74A linkage group I, whole genome shotgun sequence	585500	586500	0.54	1.34	-0.8	45.3
NC_026501.1 Neurospora crassa OR74A linkage group I, whole genome shotgun sequence	586000	587000	0.51	1.49	-0.99	42.7
NC_026501.1 Neurospora crassa OR74A linkage group I, whole genome shotgun sequence	586500	587500	0.54	1.38	-0.84	43.8
NC_026501.1 Neurospora crassa OR74A linkage group I, whole genome shotgun sequence	587000	588000	0.64	1.23	-0.59	47.9
NC_026501.1 Neurospora crassa OR74A linkage group I, whole genome shotgun sequence	587500	588500	0.71	1.17	-0.46	49.4
NC_026501.1 Neurospora crassa OR74A linkage group I, whole genome shotgun sequence	588000	589000	0.75	1.2	-0.45	44.9
NC_026501.1 Neurospora crassa OR74A linkage group I, whole genome shotgun sequence	588500	589500	0.64	1.39	-0.75	42
NC_026501.1 Neurospora crassa OR74A linkage group I, whole genome shotgun sequence	589000	590000	0.56	1.44	-0.89	45.1
NC_026501.1 Neurospora crassa OR74A linkage group I, whole genome shotgun sequence	589500	590500	0.73	1.2	-0.47	45.6
NC_026501.1 Neurospora crassa OR74A linkage group I, whole genome shotgun sequence	590000	591000	0.84	1.17	-0.33	42.3
NC_026501.1 Neurospora crassa OR74A linkage group I, whole genome shotgun sequence	590500	591500	0.86	1.24	-0.38	40.5
NC_026501.1 Neurospora crassa OR74A linkage group I, whole genome shotgun sequence	591000	592000	0.9	1.15	-0.25	45
NC_026501.1 Neurospora crassa OR74A linkage group I, whole genome shotgun sequence	591500	592500	0.68	1.26	-0.58	48.7
NC_026501.1 Neurospora crassa OR74A linkage group I, whole genome shotgun sequence	592000	593000	0.43	1.6	-1.18	45.2
NC_026501.1 Neurospora crassa OR74A linkage group I, whole genome shotgun sequence	592500	593500	0.64	1.32	-0.68	41.6
NC_026501.1 Neurospora crassa OR74A linkage group I, whole genome shotgun sequence	593000	594000	0.81	1.08	-0.28	38.7
NC_026501.1 Neurospora crassa OR74A linkage group I, whole genome shotgun sequence	593500	594500	0.87	1.22	-0.36	41.6
NC_026501.1 Neurospora crassa OR74A linkage group I, whole genome shotgun sequence	594000	595000	0.92	1.12	-0.2	53
NC_026501.1 Neurospora crassa OR74A linkage group I, whole genome shotgun sequence	594500	595500	0.78	0.99	-0.21	55.8
NC_026501.1 Neurospora crassa OR74A linkage group I, whole genome shotgun sequence	595000	596000	0.59	1.13	-0.54	53.5
NC_026501.1 Neurospora crassa OR74A linkage group I, whole genome shotgun sequence	595500	596500	0.55	1.15	-0.59	53.1
NC_026501.1 Neurospora crassa OR74A linkage group I, whole genome shotgun sequence	596000	597000	0.71	1.09	-0.39	46.7
NC_026501.1 Neurospora crassa OR74A linkage group I, whole genome shotgun sequence	596500	597500	0.64	1.27	-0.63	49.4
NC_026501.1 Neurospora crassa OR74A linkage group I, whole genome shotgun sequence	597000	598000	0.59	1.31	-0.72	51.6
NC_026501.1 Neurospora crassa OR74A linkage group I, whole genome shotgun sequence	597500	598500	0.52	1.3	-0.78	48.2
NC_026501.1 Neurospora crassa OR74A linkage group I, whole genome shotgun sequence	598000	599000	0.52	1.31	-0.78	52.6
NC_026501.1 Neurospora crassa OR74A linkage group I, whole genome shotgun sequence	598500	599500	0.76	1.22	-0.45	49.7
NC_026501.1 Neurospora crassa OR74A linkage group I, whole genome shotgun sequence	599000	600000	0.75	1.17	-0.42	44
NC_026501.1 Neurospora crassa OR74A linkage group I, whole genome shotgun sequence	599500	600500	0.82	0.9	-0.08	34.9
NC_026501.1 Neurospora crassa OR74A linkage group I, whole genome shotgun sequence	600000	601000	0.81	0.82	-0.01	38.7
NC_026501.1 Neurospora crassa OR74A linkage group I, whole genome shotgun sequence	600500	601500	0.49	1.18	-0.69	49.3
NC_026501.1 Neurospora crassa OR74A linkage group I, whole genome shotgun sequence	601000	602000	0.25	1.45	-1.2	48.9
NC_026501.1 Neurospora crassa OR74A linkage group I, whole genome shotgun sequence	601500	602500	0.35	1.47	-1.12	48.4
NC_026501.1 Neurospora crassa OR74A linkage group I, whole genome shotgun sequence	602000	603000	0.57	1.3	-0.74	46.7
NC_026501.1 Neurospora crassa OR74A linkage group I, whole genome shotgun sequence	602500	603500	0.54	1.23	-0.7	43.4
NC_026501.1 Neurospora crassa OR74A linkage group I, whole genome shotgun sequence	603000	604000	0.8	1.07	-0.27	40.9
NC_026501.1 Neurospora crassa OR74A linkage group I, whole genome shotgun sequence	603500	604500	0.93	1.05	-0.12	34.2
NC_026501.1 Neurospora crassa OR74A linkage group I, whole genome shotgun sequence	604000	605000	0.81	1.09	-0.28	31.1
NC_026501.1 Neurospora crassa OR74A linkage group I, whole genome shotgun sequence	604500	605500	0.87	1.11	-0.25	40.9
NC_026501.1 Neurospora crassa OR74A linkage group I, whole genome shotgun sequence	605000	606000	0.76	1.22	-0.46	48.1
NC_026501.1 Neurospora crassa OR74A linkage group I, whole genome shotgun sequence	605500	606500	0.67	1.28	-0.6	49.5
NC_026501.1 Neurospora crassa OR74A linkage group I, whole genome shotgun sequence	606000	607000	0.77	1.27	-0.5	47.3
NC_026501.1 Neurospora crassa OR74A linkage group I, whole genome shotgun sequence	606500	607500	0.68	1.27	-0.6	49.2
NC_026501.1 Neurospora crassa OR74A linkage group I, whole genome shotgun sequence	607000	608000	0.46	1.33	-0.87	48.3
NC_026501.1 Neurospora crassa OR74A linkage group I, whole genome shotgun sequence	607500	608500	0.57	1.33	-0.76	44.6
NC_026501.1 Neurospora crassa OR74A linkage group I, whole genome shotgun sequence	608000	609000	0.65	1.39	-0.74	48.6
NC_026501.1 Neurospora crassa OR74A linkage group I, whole genome shotgun sequence	608500	609500	0.71	1.27	-0.57	48.9
NC_026501.1 Neurospora crassa OR74A linkage group I, whole genome shotgun sequence	609000	610000	0.48	1.27	-0.8	47
NC_026501.1 Neurospora crassa OR74A linkage group I, whole genome shotgun sequence	609500	610500	0.49	1.32	-0.83	46.6
NC_026501.1 Neurospora crassa OR74A linkage group I, whole genome shotgun sequence	610000	611000	0.62	1.12	-0.5	49.7
NC_026501.1 Neurospora crassa OR74A linkage group I, whole genome shotgun sequence	610500	611500	0.55	1.09	-0.54	51.7
NC_026501.1 Neurospora crassa OR74A linkage group I, whole genome shotgun sequence	611000	612000	0.49	1.25	-0.76	50.4
NC_026501.1 Neurospora crassa OR74A linkage group I, whole genome shotgun sequence	611500	612500	0.41	1.39	-0.98	51.7
NC_026501.1 Neurospora crassa OR74A linkage group I, whole genome shotgun sequence	612000	613000	0.45	1.26	-0.81	53
NC_026501.1 Neurospora crassa OR74A linkage group I, whole genome shotgun sequence	612500	613500	0.6	1.16	-0.57	51.5
NC_026501.1 Neurospora crassa OR74A linkage group I, whole genome shotgun sequence	613000	614000	0.67	1.17	-0.5	51.6
NC_026501.1 Neurospora crassa OR74A linkage group I, whole genome shotgun sequence	613500	614500	0.72	1.07	-0.35	55.6
NC_026501.1 Neurospora crassa OR74A linkage group I, whole genome shotgun sequence	614000	615000	0.71	1.11	-0.4	47.6
NC_026501.1 Neurospora crassa OR74A linkage group I, whole genome shotgun sequence	614500	615500	0.75	1.29	-0.54	38.5
NC_026501.1 Neurospora crassa OR74A linkage group I, whole genome shotgun sequence	615000	616000	0.9	1.23	-0.33	44.7
NC_026501.1 Neurospora crassa OR74A linkage group I, whole genome shotgun sequence	615500	616500	0.93	1.18	-0.25	56
NC_026501.1 Neurospora crassa OR74A linkage group I, whole genome shotgun sequence	616000	617000	0.77	1.15	-0.39	59.3
NC_026501.1 Neurospora crassa OR74A linkage group I, whole genome shotgun sequence	616500	617500	0.83	1.06	-0.24	57.1
NC_026501.1 Neurospora crassa OR74A linkage group I, whole genome shotgun sequence	617000	618000	0.74	1.01	-0.26	56.2
NC_026501.1 Neurospora crassa OR74A linkage group I, whole genome shotgun sequence	617500	618500	0.59	1.28	-0.68	45.8
NC_026501.1 Neurospora crassa OR74A linkage group I, whole genome shotgun sequence	618000	619000	0.7	1.23	-0.53	39.9
NC_026501.1 Neurospora crassa OR74A linkage group I, whole genome shotgun sequence	618500	619500	0.94	1	-0.06	43.8
NC_026501.1 Neurospora crassa OR74A linkage group I, whole genome shotgun sequence	619000	620000	0.73	1.02	-0.29	44.4
NC_026501.1 Neurospora crassa OR74A linkage group I, whole genome shotgun sequence	619500	620500	0.9	1.02	-0.12	45.2
NC_026501.1 Neurospora crassa OR74A linkage group I, whole genome shotgun sequence	620000	621000	0.78	1.16	-0.39	34.8
NC_026501.1 Neurospora crassa OR74A linkage group I, whole genome shotgun sequence	620500	621500	0.45	1.33	-0.87	36.3
NC_026501.1 Neurospora crassa OR74A linkage group I, whole genome shotgun sequence	621000	622000	0.67	1.13	-0.47	42.1
NC_026501.1 Neurospora crassa OR74A linkage group I, whole genome shotgun sequence	621500	622500	0.72	1.04	-0.32	46.8
NC_026501.1 Neurospora crassa OR74A linkage group I, whole genome shotgun sequence	622000	623000	0.83	0.81	0.02	57.8
NC_026501.1 Neurospora crassa OR74A linkage group I, whole genome shotgun sequence	622500	623500	0.86	0.86	0	53.5
NC_026501.1 Neurospora crassa OR74A linkage group I, whole genome shotgun sequence	623000	624000	0.54	1.28	-0.74	49.6
NC_026501.1 Neurospora crassa OR74A linkage group I, whole genome shotgun sequence	623500	624500	0.39	1.49	-1.1	49.8
NC_026501.1 Neurospora crassa OR74A linkage group I, whole genome shotgun sequence	624000	625000	0.46	1.39	-0.93	49.3
NC_026501.1 Neurospora crassa OR74A linkage group I, whole genome shotgun sequence	624500	625500	0.71	1.12	-0.41	45.8
NC_026501.1 Neurospora crassa OR74A linkage group I, whole genome shotgun sequence	625000	626000	0.58	1.26	-0.68	42.1
NC_026501.1 Neurospora crassa OR74A linkage group I, whole genome shotgun sequence	625500	626500	0.49	1.44	-0.95	44.5
NC_026501.1 Neurospora crassa OR74A linkage group I, whole genome shotgun sequence	626000	627000	0.84	1.09	-0.25	47.9
NC_026501.1 Neurospora crassa OR74A linkage group I, whole genome shotgun sequence	626500	627500	0.77	1.09	-0.32	49.4
NC_026501.1 Neurospora crassa OR74A linkage group I, whole genome shotgun sequence	627000	628000	0.62	1.23	-0.62	50.6
NC_026501.1 Neurospora crassa OR74A linkage group I, whole genome shotgun sequence	627500	628500	0.59	1.26	-0.67	53.6
NC_026501.1 Neurospora crassa OR74A linkage group I, whole genome shotgun sequence	628000	629000	0.57	1.32	-0.75	51.2
NC_026501.1 Neurospora crassa OR74A linkage group I, whole genome shotgun sequence	628500	629500	0.56	1.39	-0.82	38.2
NC_026501.1 Neurospora crassa OR74A linkage group I, whole genome shotgun sequence	629000	630000	0.81	1.15	-0.34	31.8
NC_026501.1 Neurospora crassa OR74A linkage group I, whole genome shotgun sequence	629500	630500	0.93	1.03	-0.1	37.1
NC_026501.1 Neurospora crassa OR74A linkage group I, whole genome shotgun sequence	630000	631000	0.98	0.99	-0.01	39.7
NC_026501.1 Neurospora crassa OR74A linkage group I, whole genome shotgun sequence	630500	631500	0.9	0.91	-0.01	44.1
NC_026501.1 Neurospora crassa OR74A linkage group I, whole genome shotgun sequence	631000	632000	0.74	1.04	-0.3	47.9
NC_026501.1 Neurospora crassa OR74A linkage group I, whole genome shotgun sequence	631500	632500	0.76	1.21	-0.45	46.3
NC_026501.1 Neurospora crassa OR74A linkage group I, whole genome shotgun sequence	632000	633000	0.7	1.26	-0.56	49.3
NC_026501.1 Neurospora crassa OR74A linkage group I, whole genome shotgun sequence	632500	633500	0.54	1.27	-0.73	52.5
NC_026501.1 Neurospora crassa OR74A linkage group I, whole genome shotgun sequence	633000	634000	0.69	1.1	-0.41	50.9
NC_026501.1 Neurospora crassa OR74A linkage group I, whole genome shotgun sequence	633500	634500	0.91	1.17	-0.27	49.4
NC_026501.1 Neurospora crassa OR74A linkage group I, whole genome shotgun sequence	634000	635000	0.38	1.35	-0.97	54.3
NC_026501.1 Neurospora crassa OR74A linkage group I, whole genome shotgun sequence	634500	635500	0.28	1.19	-0.91	58.7
NC_026501.1 Neurospora crassa OR74A linkage group I, whole genome shotgun sequence	635000	636000	0.39	1.28	-0.89	52.8
NC_026501.1 Neurospora crassa OR74A linkage group I, whole genome shotgun sequence	635500	636500	0.67	1.36	-0.7	47.5
NC_026501.1 Neurospora crassa OR74A linkage group I, whole genome shotgun sequence	636000	637000	0.64	1.22	-0.58	46.8
NC_026501.1 Neurospora crassa OR74A linkage group I, whole genome shotgun sequence	636500	637500	0.72	1.08	-0.36	47.1
NC_026501.1 Neurospora crassa OR74A linkage group I, whole genome shotgun sequence	637000	638000	0.9	0.99	-0.09	47.2
NC_026501.1 Neurospora crassa OR74A linkage group I, whole genome shotgun sequence	637500	638500	0.58	1.25	-0.67	40.5
NC_026501.1 Neurospora crassa OR74A linkage group I, whole genome shotgun sequence	638000	639000	0.47	1.23	-0.76	44.1
NC_026501.1 Neurospora crassa OR74A linkage group I, whole genome shotgun sequence	638500	639500	0.59	1.12	-0.52	49
NC_026501.1 Neurospora crassa OR74A linkage group I, whole genome shotgun sequence	639000	640000	0.71	1.12	-0.41	49.6
NC_026501.1 Neurospora crassa OR74A linkage group I, whole genome shotgun sequence	639500	640500	0.75	1.09	-0.34	52.1
NC_026501.1 Neurospora crassa OR74A linkage group I, whole genome shotgun sequence	640000	641000	0.67	1.17	-0.49	49.6
NC_026501.1 Neurospora crassa OR74A linkage group I, whole genome shotgun sequence	640500	641500	0.54	1.19	-0.65	51.4
NC_026501.1 Neurospora crassa OR74A linkage group I, whole genome shotgun sequence	641000	642000	0.58	1.25	-0.66	53.6
NC_026501.1 Neurospora crassa OR74A linkage group I, whole genome shotgun sequence	641500	642500	0.66	1.28	-0.62	52.1
NC_026501.1 Neurospora crassa OR74A linkage group I, whole genome shotgun sequence	642000	643000	0.62	1.35	-0.73	49.8
NC_026501.1 Neurospora crassa OR74A linkage group I, whole genome shotgun sequence	642500	643500	0.66	1.37	-0.72	42.8
NC_026501.1 Neurospora crassa OR74A linkage group I, whole genome shotgun sequence	643000	644000	0.91	0.92	-0.01	40.1
NC_026501.1 Neurospora crassa OR74A linkage group I, whole genome shotgun sequence	643500	644500	0.86	0.95	-0.09	44.8
NC_026501.1 Neurospora crassa OR74A linkage group I, whole genome shotgun sequence	644000	645000	0.6	1.23	-0.63	51
NC_026501.1 Neurospora crassa OR74A linkage group I, whole genome shotgun sequence	644500	645500	0.49	1.35	-0.86	52
NC_026501.1 Neurospora crassa OR74A linkage group I, whole genome shotgun sequence	645000	646000	0.58	1.23	-0.65	46.8
NC_026501.1 Neurospora crassa OR74A linkage group I, whole genome shotgun sequence	645500	646500	0.57	1.08	-0.51	50.7
NC_026501.1 Neurospora crassa OR74A linkage group I, whole genome shotgun sequence	646000	647000	0.68	1.08	-0.4	50.9
NC_026501.1 Neurospora crassa OR74A linkage group I, whole genome shotgun sequence	646500	647500	0.63	1.17	-0.54	48.6
NC_026501.1 Neurospora crassa OR74A linkage group I, whole genome shotgun sequence	647000	648000	0.44	1.34	-0.9	49.8
NC_026501.1 Neurospora crassa OR74A linkage group I, whole genome shotgun sequence	647500	648500	0.39	1.33	-0.94	48.5
NC_026501.1 Neurospora crassa OR74A linkage group I, whole genome shotgun sequence	648000	649000	0.43	1.43	-1	51.9
NC_026501.1 Neurospora crassa OR74A linkage group I, whole genome shotgun sequence	648500	649500	0.67	1.39	-0.71	53
NC_026501.1 Neurospora crassa OR74A linkage group I, whole genome shotgun sequence	649000	650000	0.74	1.15	-0.41	48.7
NC_026501.1 Neurospora crassa OR74A linkage group I, whole genome shotgun sequence	649500	650500	0.58	1.23	-0.65	45.3
NC_026501.1 Neurospora crassa OR74A linkage group I, whole genome shotgun sequence	650000	651000	0.78	1.17	-0.39	48.9
NC_026501.1 Neurospora crassa OR74A linkage group I, whole genome shotgun sequence	650500	651500	0.9	1.09	-0.19	51.9
NC_026501.1 Neurospora crassa OR74A linkage group I, whole genome shotgun sequence	651000	652000	0.82	1.16	-0.34	46.4
NC_026501.1 Neurospora crassa OR74A linkage group I, whole genome shotgun sequence	651500	652500	0.87	1.21	-0.34	42.8
NC_026501.1 Neurospora crassa OR74A linkage group I, whole genome shotgun sequence	652000	653000	0.81	1.2	-0.39	47.2
NC_026501.1 Neurospora crassa OR74A linkage group I, whole genome shotgun sequence	652500	653500	0.86	1.2	-0.34	49.8
NC_026501.1 Neurospora crassa OR74A linkage group I, whole genome shotgun sequence	653000	654000	0.66	1.24	-0.58	49.4
NC_026501.1 Neurospora crassa OR74A linkage group I, whole genome shotgun sequence	653500	654500	0.59	1.52	-0.93	51.6
NC_026501.1 Neurospora crassa OR74A linkage group I, whole genome shotgun sequence	654000	655000	0.68	1.43	-0.75	51.6
NC_026501.1 Neurospora crassa OR74A linkage group I, whole genome shotgun sequence	654500	655500	0.81	1.1	-0.29	48.6
NC_026501.1 Neurospora crassa OR74A linkage group I, whole genome shotgun sequence	655000	656000	0.8	1.05	-0.24	42.9
NC_026501.1 Neurospora crassa OR74A linkage group I, whole genome shotgun sequence	655500	656500	0.65	1.09	-0.45	34.2
NC_026501.1 Neurospora crassa OR74A linkage group I, whole genome shotgun sequence	656000	657000	0.54	1.59	-1.05	33.7
NC_026501.1 Neurospora crassa OR74A linkage group I, whole genome shotgun sequence	656500	657500	0.64	1.42	-0.78	42.5
NC_026501.1 Neurospora crassa OR74A linkage group I, whole genome shotgun sequence	657000	658000	0.92	1.07	-0.14	44.7
NC_026501.1 Neurospora crassa OR74A linkage group I, whole genome shotgun sequence	657500	658500	0.86	1.28	-0.42	44.4
NC_026501.1 Neurospora crassa OR74A linkage group I, whole genome shotgun sequence	658000	659000	0.69	1.36	-0.66	45.6
NC_026501.1 Neurospora crassa OR74A linkage group I, whole genome shotgun sequence	658500	659500	0.62	1.29	-0.67	44
NC_026501.1 Neurospora crassa OR74A linkage group I, whole genome shotgun sequence	659000	660000	0.64	1.29	-0.65	44.8
NC_026501.1 Neurospora crassa OR74A linkage group I, whole genome shotgun sequence	659500	660500	0.6	1.22	-0.62	46.7
NC_026501.1 Neurospora crassa OR74A linkage group I, whole genome shotgun sequence	660000	661000	0.65	1.16	-0.51	47.9
NC_026501.1 Neurospora crassa OR74A linkage group I, whole genome shotgun sequence	660500	661500	0.62	1.24	-0.62	47.3
NC_026501.1 Neurospora crassa OR74A linkage group I, whole genome shotgun sequence	661000	662000	0.51	1.43	-0.92	44.3
NC_026501.1 Neurospora crassa OR74A linkage group I, whole genome shotgun sequence	661500	662500	0.64	1.27	-0.63	45.5
NC_026501.1 Neurospora crassa OR74A linkage group I, whole genome shotgun sequence	662000	663000	0.67	1.17	-0.5	49
NC_026501.1 Neurospora crassa OR74A linkage group I, whole genome shotgun sequence	662500	663500	0.57	1.21	-0.65	49.1
NC_026501.1 Neurospora crassa OR74A linkage group I, whole genome shotgun sequence	663000	664000	0.68	1.27	-0.58	44.7
NC_026501.1 Neurospora crassa OR74A linkage group I, whole genome shotgun sequence	663500	664500	0.83	1.27	-0.44	44.2
NC_026501.1 Neurospora crassa OR74A linkage group I, whole genome shotgun sequence	664000	665000	0.62	1.27	-0.65	48.9
NC_026501.1 Neurospora crassa OR74A linkage group I, whole genome shotgun sequence	664500	665500	0.66	1.18	-0.52	51.2
NC_026501.1 Neurospora crassa OR74A linkage group I, whole genome shotgun sequence	665000	666000	0.75	1.28	-0.54	51.8
NC_026501.1 Neurospora crassa OR74A linkage group I, whole genome shotgun sequence	665500	666500	0.57	1.46	-0.89	52
NC_026501.1 Neurospora crassa OR74A linkage group I, whole genome shotgun sequence	666000	667000	0.53	1.41	-0.88	51.2
NC_026501.1 Neurospora crassa OR74A linkage group I, whole genome shotgun sequence	666500	667500	0.48	1.42	-0.94	50.3
NC_026501.1 Neurospora crassa OR74A linkage group I, whole genome shotgun sequence	667000	668000	0.53	1.31	-0.78	49.5
NC_026501.1 Neurospora crassa OR74A linkage group I, whole genome shotgun sequence	667500	668500	0.59	1.3	-0.71	48.4
NC_026501.1 Neurospora crassa OR74A linkage group I, whole genome shotgun sequence	668000	669000	0.75	1.13	-0.38	47.5
NC_026501.1 Neurospora crassa OR74A linkage group I, whole genome shotgun sequence	668500	669500	0.91	0.99	-0.08	45.8
NC_026501.1 Neurospora crassa OR74A linkage group I, whole genome shotgun sequence	669000	670000	0.9	1.05	-0.15	41
NC_026501.1 Neurospora crassa OR74A linkage group I, whole genome shotgun sequence	669500	670500	0.95	1.12	-0.18	41.6
NC_026501.1 Neurospora crassa OR74A linkage group I, whole genome shotgun sequence	670000	671000	1.06	1.02	0.05	31.5
NC_026501.1 Neurospora crassa OR74A linkage group I, whole genome shotgun sequence	670500	671500	1.24	0.56	0.68	17.3
NC_026501.1 Neurospora crassa OR74A linkage group I, whole genome shotgun sequence	671000	672000	1.35	0.58	0.77	14
NC_026501.1 Neurospora crassa OR74A linkage group I, whole genome shotgun sequence	671500	672500	1.8	0.42	1.39	17.1
NC_026501.1 Neurospora crassa OR74A linkage group I, whole genome shotgun sequence	672000	673000	1.7	0.45	1.24	25.7
NC_026501.1 Neurospora crassa OR74A linkage group I, whole genome shotgun sequence	672500	673500	1.74	0.5	1.24	26.5
NC_026501.1 Neurospora crassa OR74A linkage group I, whole genome shotgun sequence	673000	674000	1.76	0.4	1.36	19.4
NC_026501.1 Neurospora crassa OR74A linkage group I, whole genome shotgun sequence	673500	674500	1.49	0.29	1.2	14.1
NC_026501.1 Neurospora crassa OR74A linkage group I, whole genome shotgun sequence	674000	675000	1.56	0.47	1.09	15.7
NC_026501.1 Neurospora crassa OR74A linkage group I, whole genome shotgun sequence	674500	675500	1.5	0.6	0.9	14.4
NC_026501.1 Neurospora crassa OR74A linkage group I, whole genome shotgun sequence	675000	676000	1.73	0.42	1.31	15.6
NC_026501.1 Neurospora crassa OR74A linkage group I, whole genome shotgun sequence	675500	676500	1.63	0.53	1.1	13.4
NC_026501.1 Neurospora crassa OR74A linkage group I, whole genome shotgun sequence	676000	677000	1.44	0.48	0.96	10.7
NC_026501.1 Neurospora crassa OR74A linkage group I, whole genome shotgun sequence	676500	677500	1.67	0.19	1.48	13.8
NC_026501.1 Neurospora crassa OR74A linkage group I, whole genome shotgun sequence	677000	678000	1.75	0.24	1.51	12.1
NC_026501.1 Neurospora crassa OR74A linkage group I, whole genome shotgun sequence	677500	678500	1.61	0.42	1.18	11.3
NC_026501.1 Neurospora crassa OR74A linkage group I, whole genome shotgun sequence	678000	679000	1.85	0.32	1.53	12.2
NC_026501.1 Neurospora crassa OR74A linkage group I, whole genome shotgun sequence	678500	679500	1.59	0.38	1.2	14.2
NC_026501.1 Neurospora crassa OR74A linkage group I, whole genome shotgun sequence	679000	680000	1.41	0.72	0.69	21.1
NC_026501.1 Neurospora crassa OR74A linkage group I, whole genome shotgun sequence	679500	680500	1.4	0.75	0.65	26.5
NC_026501.1 Neurospora crassa OR74A linkage group I, whole genome shotgun sequence	680000	681000	1.33	0.57	0.77	19.5
NC_026501.1 Neurospora crassa OR74A linkage group I, whole genome shotgun sequence	680500	681500	1.62	0.31	1.31	14.4
NC_026501.1 Neurospora crassa OR74A linkage group I, whole genome shotgun sequence	681000	682000	1.7	0.23	1.47	13.9
NC_026501.1 Neurospora crassa OR74A linkage group I, whole genome shotgun sequence	681500	682500	1.78	0.11	1.67	10
NC_026501.1 Neurospora crassa OR74A linkage group I, whole genome shotgun sequence	682000	683000	2	0.03	1.97	9.6
NC_026501.1 Neurospora crassa OR74A linkage group I, whole genome shotgun sequence	682500	683500	1.92	0.2	1.72	14.1
NC_026501.1 Neurospora crassa OR74A linkage group I, whole genome shotgun sequence	683000	684000	1.67	0.35	1.32	16.7
NC_026501.1 Neurospora crassa OR74A linkage group I, whole genome shotgun sequence	683500	684500	1.37	0.44	0.93	14.9
NC_026501.1 Neurospora crassa OR74A linkage group I, whole genome shotgun sequence	684000	685000	1.18	0.49	0.69	15.2
NC_026501.1 Neurospora crassa OR74A linkage group I, whole genome shotgun sequence	684500	685500	1.31	0.45	0.86	15.7
NC_026501.1 Neurospora crassa OR74A linkage group I, whole genome shotgun sequence	685000	686000	1.56	0.25	1.31	15.8
NC_026501.1 Neurospora crassa OR74A linkage group I, whole genome shotgun sequence	685500	686500	1.41	0.25	1.16	12.9
NC_026501.1 Neurospora crassa OR74A linkage group I, whole genome shotgun sequence	686000	687000	1.58	0.29	1.29	7.1
NC_026501.1 Neurospora crassa OR74A linkage group I, whole genome shotgun sequence	686500	687500	2.15	0.21	1.94	5.5
NC_026501.1 Neurospora crassa OR74A linkage group I, whole genome shotgun sequence	687000	688000	1.49	0.64	0.84	11.8
NC_026501.1 Neurospora crassa OR74A linkage group I, whole genome shotgun sequence	687500	688500	1.49	0.59	0.9	12.9
NC_026501.1 Neurospora crassa OR74A linkage group I, whole genome shotgun sequence	688000	689000	1.64	0.32	1.31	11.8
NC_026501.1 Neurospora crassa OR74A linkage group I, whole genome shotgun sequence	688500	689500	1.65	0.28	1.38	11.4
NC_026501.1 Neurospora crassa OR74A linkage group I, whole genome shotgun sequence	689000	690000	1.56	0.35	1.21	9.4
NC_026501.1 Neurospora crassa OR74A linkage group I, whole genome shotgun sequence	689500	690500	1.44	0.43	1.01	12
NC_026501.1 Neurospora crassa OR74A linkage group I, whole genome shotgun sequence	690000	691000	1.45	0.45	1	10.9
NC_026501.1 Neurospora crassa OR74A linkage group I, whole genome shotgun sequence	690500	691500	1.48	0.45	1.04	8.7
NC_026501.1 Neurospora crassa OR74A linkage group I, whole genome shotgun sequence	691000	692000	1.54	0.48	1.07	12.2
NC_026501.1 Neurospora crassa OR74A linkage group I, whole genome shotgun sequence	691500	692500	1.54	0.51	1.03	15.3
NC_026501.1 Neurospora crassa OR74A linkage group I, whole genome shotgun sequence	692000	693000	1.7	0.45	1.25	11.8
NC_026501.1 Neurospora crassa OR74A linkage group I, whole genome shotgun sequence	692500	693500	1.86	0.34	1.52	11.3
NC_026501.1 Neurospora crassa OR74A linkage group I, whole genome shotgun sequence	693000	694000	1.57	0.42	1.14	11.1
NC_026501.1 Neurospora crassa OR74A linkage group I, whole genome shotgun sequence	693500	694500	1.46	0.41	1.06	10.4
NC_026501.1 Neurospora crassa OR74A linkage group I, whole genome shotgun sequence	694000	695000	1.59	0.36	1.23	10.5
NC_026501.1 Neurospora crassa OR74A linkage group I, whole genome shotgun sequence	694500	695500	1.52	0.38	1.14	12
NC_026501.1 Neurospora crassa OR74A linkage group I, whole genome shotgun sequence	695000	696000	1.28	0.57	0.71	19.1
NC_026501.1 Neurospora crassa OR74A linkage group I, whole genome shotgun sequence	695500	696500	1.1	0.7	0.41	24.9
NC_026501.1 Neurospora crassa OR74A linkage group I, whole genome shotgun sequence	696000	697000	1.24	0.98	0.26	37.4
NC_026501.1 Neurospora crassa OR74A linkage group I, whole genome shotgun sequence	696500	697500	1.32	1.03	0.29	43.3
NC_026501.1 Neurospora crassa OR74A linkage group I, whole genome shotgun sequence	697000	698000	1.23	0.98	0.24	41.3
NC_026501.1 Neurospora crassa OR74A linkage group I, whole genome shotgun sequence	697500	698500	1.15	1.09	0.05	40.2
NC_026501.1 Neurospora crassa OR74A linkage group I, whole genome shotgun sequence	698000	699000	0.82	1.03	-0.21	43.5
NC_026501.1 Neurospora crassa OR74A linkage group I, whole genome shotgun sequence	698500	699500	0.63	1.19	-0.56	51.1
NC_026501.1 Neurospora crassa OR74A linkage group I, whole genome shotgun sequence	699000	700000	0.66	1.15	-0.49	53.5
NC_026501.1 Neurospora crassa OR74A linkage group I, whole genome shotgun sequence	699500	700500	0.88	1.01	-0.13	53.2
NC_026501.1 Neurospora crassa OR74A linkage group I, whole genome shotgun sequence	700000	701000	0.89	1.13	-0.24	48.3
NC_026501.1 Neurospora crassa OR74A linkage group I, whole genome shotgun sequence	700500	701500	0.9	1.12	-0.22	47.5
NC_026501.1 Neurospora crassa OR74A linkage group I, whole genome shotgun sequence	701000	702000	1.11	1.09	0.02	49.9
NC_026501.1 Neurospora crassa OR74A linkage group I, whole genome shotgun sequence	701500	702500	1.09	1.06	0.03	49
NC_026501.1 Neurospora crassa OR74A linkage group I, whole genome shotgun sequence	702000	703000	0.8	1.19	-0.4	49.7
NC_026501.1 Neurospora crassa OR74A linkage group I, whole genome shotgun sequence	702500	703500	0.74	1.29	-0.56	52.3
NC_026501.1 Neurospora crassa OR74A linkage group I, whole genome shotgun sequence	703000	704000	0.69	1.32	-0.64	52.7
NC_026501.1 Neurospora crassa OR74A linkage group I, whole genome shotgun sequence	703500	704500	0.66	1.34	-0.68	49.5
NC_026501.1 Neurospora crassa OR74A linkage group I, whole genome shotgun sequence	704000	705000	0.6	1.33	-0.72	48.4
NC_026501.1 Neurospora crassa OR74A linkage group I, whole genome shotgun sequence	704500	705500	0.59	1.32	-0.73	49.9
NC_026501.1 Neurospora crassa OR74A linkage group I, whole genome shotgun sequence	705000	706000	0.81	1.2	-0.39	51.5
NC_026501.1 Neurospora crassa OR74A linkage group I, whole genome shotgun sequence	705500	706500	0.59	1.33	-0.74	53.2
NC_026501.1 Neurospora crassa OR74A linkage group I, whole genome shotgun sequence	706000	707000	0.41	1.49	-1.07	52.9
NC_026501.1 Neurospora crassa OR74A linkage group I, whole genome shotgun sequence	706500	707500	0.5	1.24	-0.74	51.8
NC_026501.1 Neurospora crassa OR74A linkage group I, whole genome shotgun sequence	707000	708000	0.33	1.28	-0.94	49.3
NC_026501.1 Neurospora crassa OR74A linkage group I, whole genome shotgun sequence	707500	708500	0.44	1.22	-0.78	46.3
NC_026501.1 Neurospora crassa OR74A linkage group I, whole genome shotgun sequence	708000	709000	0.6	1.14	-0.55	45.3
NC_026501.1 Neurospora crassa OR74A linkage group I, whole genome shotgun sequence	708500	709500	0.53	1.39	-0.85	45.8
NC_026501.1 Neurospora crassa OR74A linkage group I, whole genome shotgun sequence	709000	710000	0.61	1.28	-0.67	44.6
NC_026501.1 Neurospora crassa OR74A linkage group I, whole genome shotgun sequence	709500	710500	0.61	1.11	-0.5	40.7
NC_026501.1 Neurospora crassa OR74A linkage group I, whole genome shotgun sequence	710000	711000	0.6	1.27	-0.67	40.5
NC_026501.1 Neurospora crassa OR74A linkage group I, whole genome shotgun sequence	710500	711500	0.76	1.25	-0.49	43.9
NC_026501.1 Neurospora crassa OR74A linkage group I, whole genome shotgun sequence	711000	712000	0.6	1.21	-0.61	50.9
NC_026501.1 Neurospora crassa OR74A linkage group I, whole genome shotgun sequence	711500	712500	0.49	1.12	-0.63	57.9
NC_026501.1 Neurospora crassa OR74A linkage group I, whole genome shotgun sequence	712000	713000	0.53	1	-0.47	57.7
NC_026501.1 Neurospora crassa OR74A linkage group I, whole genome shotgun sequence	712500	713500	0.61	1.16	-0.55	49
NC_026501.1 Neurospora crassa OR74A linkage group I, whole genome shotgun sequence	713000	714000	0.72	1.16	-0.44	44.4
NC_026501.1 Neurospora crassa OR74A linkage group I, whole genome shotgun sequence	713500	714500	0.8	1.13	-0.32	47.8
NC_026501.1 Neurospora crassa OR74A linkage group I, whole genome shotgun sequence	714000	715000	0.73	1.05	-0.32	51.3
NC_026501.1 Neurospora crassa OR74A linkage group I, whole genome shotgun sequence	714500	715500	0.71	0.97	-0.26	50.5
NC_026501.1 Neurospora crassa OR74A linkage group I, whole genome shotgun sequence	715000	716000	1.12	0.89	0.23	48.8
NC_026501.1 Neurospora crassa OR74A linkage group I, whole genome shotgun sequence	715500	716500	1.2	0.9	0.3	44.7
NC_026501.1 Neurospora crassa OR74A linkage group I, whole genome shotgun sequence	716000	717000	0.78	1.14	-0.36	42.3
NC_026501.1 Neurospora crassa OR74A linkage group I, whole genome shotgun sequence	716500	717500	0.54	1.41	-0.88	46.5
NC_026501.1 Neurospora crassa OR74A linkage group I, whole genome shotgun sequence	717000	718000	0.35	1.41	-1.06	55.8
NC_026501.1 Neurospora crassa OR74A linkage group I, whole genome shotgun sequence	717500	718500	0.36	1.27	-0.91	63.6
NC_026501.1 Neurospora crassa OR74A linkage group I, whole genome shotgun sequence	718000	719000	0.48	1.28	-0.79	53.7
NC_026501.1 Neurospora crassa OR74A linkage group I, whole genome shotgun sequence	718500	719500	0.61	1.2	-0.59	46.6
NC_026501.1 Neurospora crassa OR74A linkage group I, whole genome shotgun sequence	719000	720000	0.75	1.18	-0.43	48.4
NC_026501.1 Neurospora crassa OR74A linkage group I, whole genome shotgun sequence	719500	720500	0.83	1.13	-0.3	43.2
NC_026501.1 Neurospora crassa OR74A linkage group I, whole genome shotgun sequence	720000	721000	0.59	1.3	-0.72	43.4
NC_026501.1 Neurospora crassa OR74A linkage group I, whole genome shotgun sequence	720500	721500	0.62	1.42	-0.8	50.1
NC_026501.1 Neurospora crassa OR74A linkage group I, whole genome shotgun sequence	721000	722000	0.79	1.18	-0.39	53.3
NC_026501.1 Neurospora crassa OR74A linkage group I, whole genome shotgun sequence	721500	722500	0.7	1.14	-0.44	50.6
NC_026501.1 Neurospora crassa OR74A linkage group I, whole genome shotgun sequence	722000	723000	0.5	1.24	-0.74	50.3
NC_026501.1 Neurospora crassa OR74A linkage group I, whole genome shotgun sequence	722500	723500	0.51	1.34	-0.83	51.6
NC_026501.1 Neurospora crassa OR74A linkage group I, whole genome shotgun sequence	723000	724000	0.54	1.67	-1.13	49.4
NC_026501.1 Neurospora crassa OR74A linkage group I, whole genome shotgun sequence	723500	724500	0.46	1.67	-1.21	53.7
NC_026501.1 Neurospora crassa OR74A linkage group I, whole genome shotgun sequence	724000	725000	0.45	1.32	-0.87	53.6
NC_026501.1 Neurospora crassa OR74A linkage group I, whole genome shotgun sequence	724500	725500	0.41	1.17	-0.76	49.9
NC_026501.1 Neurospora crassa OR74A linkage group I, whole genome shotgun sequence	725000	726000	0.64	1.22	-0.58	48
NC_026501.1 Neurospora crassa OR74A linkage group I, whole genome shotgun sequence	725500	726500	0.68	1.26	-0.58	49.2
NC_026501.1 Neurospora crassa OR74A linkage group I, whole genome shotgun sequence	726000	727000	0.4	1.4	-0.99	52.3
NC_026501.1 Neurospora crassa OR74A linkage group I, whole genome shotgun sequence	726500	727500	0.34	1.41	-1.07	53.6
NC_026501.1 Neurospora crassa OR74A linkage group I, whole genome shotgun sequence	727000	728000	0.56	1.28	-0.72	51.9
NC_026501.1 Neurospora crassa OR74A linkage group I, whole genome shotgun sequence	727500	728500	0.55	1.27	-0.72	49.1
NC_026501.1 Neurospora crassa OR74A linkage group I, whole genome shotgun sequence	728000	729000	0.64	1.19	-0.55	48.4
NC_026501.1 Neurospora crassa OR74A linkage group I, whole genome shotgun sequence	728500	729500	0.7	1.26	-0.55	48.6
NC_026501.1 Neurospora crassa OR74A linkage group I, whole genome shotgun sequence	729000	730000	0.48	1.35	-0.87	51.4
NC_026501.1 Neurospora crassa OR74A linkage group I, whole genome shotgun sequence	729500	730500	0.48	1.4	-0.92	51.6
NC_026501.1 Neurospora crassa OR74A linkage group I, whole genome shotgun sequence	730000	731000	0.8	1.16	-0.36	47.5
NC_026501.1 Neurospora crassa OR74A linkage group I, whole genome shotgun sequence	730500	731500	1.02	0.89	0.13	44.4
NC_026501.1 Neurospora crassa OR74A linkage group I, whole genome shotgun sequence	731000	732000	0.76	1.05	-0.29	44.8
NC_026501.1 Neurospora crassa OR74A linkage group I, whole genome shotgun sequence	731500	732500	0.67	1.25	-0.58	44.5
NC_026501.1 Neurospora crassa OR74A linkage group I, whole genome shotgun sequence	732000	733000	0.74	1.21	-0.48	44.3
NC_026501.1 Neurospora crassa OR74A linkage group I, whole genome shotgun sequence	732500	733500	0.72	1.3	-0.59	41
NC_026501.1 Neurospora crassa OR74A linkage group I, whole genome shotgun sequence	733000	734000	0.5	1.3	-0.8	35.7
NC_026501.1 Neurospora crassa OR74A linkage group I, whole genome shotgun sequence	733500	734500	0.55	1.14	-0.59	35
NC_026501.1 Neurospora crassa OR74A linkage group I, whole genome shotgun sequence	734000	735000	0.68	1.06	-0.38	38.9
NC_026501.1 Neurospora crassa OR74A linkage group I, whole genome shotgun sequence	734500	735500	0.73	1.07	-0.33	45.5
NC_026501.1 Neurospora crassa OR74A linkage group I, whole genome shotgun sequence	735000	736000	0.69	1.18	-0.48	50
NC_026501.1 Neurospora crassa OR74A linkage group I, whole genome shotgun sequence	735500	736500	0.42	1.38	-0.96	51.2
NC_026501.1 Neurospora crassa OR74A linkage group I, whole genome shotgun sequence	736000	737000	0.53	1.42	-0.89	49.8
NC_026501.1 Neurospora crassa OR74A linkage group I, whole genome shotgun sequence	736500	737500	0.69	1.36	-0.67	47.9
NC_026501.1 Neurospora crassa OR74A linkage group I, whole genome shotgun sequence	737000	738000	0.58	1.3	-0.73	47.5
NC_026501.1 Neurospora crassa OR74A linkage group I, whole genome shotgun sequence	737500	738500	0.52	1.3	-0.78	48.6
NC_026501.1 Neurospora crassa OR74A linkage group I, whole genome shotgun sequence	738000	739000	0.64	1.18	-0.54	49
NC_026501.1 Neurospora crassa OR74A linkage group I, whole genome shotgun sequence	738500	739500	0.83	1.09	-0.25	49.6
NC_026501.1 Neurospora crassa OR74A linkage group I, whole genome shotgun sequence	739000	740000	0.78	1.19	-0.41	49.5
NC_026501.1 Neurospora crassa OR74A linkage group I, whole genome shotgun sequence	739500	740500	0.97	1.02	-0.05	48.2
NC_026501.1 Neurospora crassa OR74A linkage group I, whole genome shotgun sequence	740000	741000	1.08	0.95	0.13	47.4
NC_026501.1 Neurospora crassa OR74A linkage group I, whole genome shotgun sequence	740500	741500	0.77	1.15	-0.38	48.8
NC_026501.1 Neurospora crassa OR74A linkage group I, whole genome shotgun sequence	741000	742000	0.82	1.12	-0.29	52.4
NC_026501.1 Neurospora crassa OR74A linkage group I, whole genome shotgun sequence	741500	742500	1.44	0.95	0.49	47.9
NC_026501.1 Neurospora crassa OR74A linkage group I, whole genome shotgun sequence	742000	743000	0.75	1.01	-0.26	42.8
NC_026501.1 Neurospora crassa OR74A linkage group I, whole genome shotgun sequence	742500	743500	0.34	1.32	-0.97	49
NC_026501.1 Neurospora crassa OR74A linkage group I, whole genome shotgun sequence	743000	744000	0.54	1.28	-0.74	54.8
NC_026501.1 Neurospora crassa OR74A linkage group I, whole genome shotgun sequence	743500	744500	0.62	1.21	-0.58	55.6
NC_026501.1 Neurospora crassa OR74A linkage group I, whole genome shotgun sequence	744000	745000	0.57	1.24	-0.67	53.1
NC_026501.1 Neurospora crassa OR74A linkage group I, whole genome shotgun sequence	744500	745500	0.7	1.09	-0.39	53.4
NC_026501.1 Neurospora crassa OR74A linkage group I, whole genome shotgun sequence	745000	746000	0.71	1.18	-0.47	55.3
NC_026501.1 Neurospora crassa OR74A linkage group I, whole genome shotgun sequence	745500	746500	0.54	1.46	-0.91	51.2
NC_026501.1 Neurospora crassa OR74A linkage group I, whole genome shotgun sequence	746000	747000	0.57	1.47	-0.9	45
NC_026501.1 Neurospora crassa OR74A linkage group I, whole genome shotgun sequence	746500	747500	0.77	1.22	-0.45	40.3
NC_026501.1 Neurospora crassa OR74A linkage group I, whole genome shotgun sequence	747000	748000	0.8	1.11	-0.31	44.3
NC_026501.1 Neurospora crassa OR74A linkage group I, whole genome shotgun sequence	747500	748500	0.67	1.18	-0.51	42
NC_026501.1 Neurospora crassa OR74A linkage group I, whole genome shotgun sequence	748000	749000	0.81	1.14	-0.33	35.8
NC_026501.1 Neurospora crassa OR74A linkage group I, whole genome shotgun sequence	748500	749500	0.74	1.11	-0.37	44.5
NC_026501.1 Neurospora crassa OR74A linkage group I, whole genome shotgun sequence	749000	750000	0.51	1.15	-0.64	51
NC_026501.1 Neurospora crassa OR74A linkage group I, whole genome shotgun sequence	749500	750500	0.67	1.12	-0.45	47.6
NC_026501.1 Neurospora crassa OR74A linkage group I, whole genome shotgun sequence	750000	751000	0.8	1.14	-0.34	49.2
NC_026501.1 Neurospora crassa OR74A linkage group I, whole genome shotgun sequence	750500	751500	0.57	1.39	-0.82	53.4
NC_026501.1 Neurospora crassa OR74A linkage group I, whole genome shotgun sequence	751000	752000	0.58	1.34	-0.76	51.7
NC_026501.1 Neurospora crassa OR74A linkage group I, whole genome shotgun sequence	751500	752500	0.71	1.16	-0.46	48.6
NC_026501.1 Neurospora crassa OR74A linkage group I, whole genome shotgun sequence	752000	753000	0.51	1.39	-0.88	48.2
NC_026501.1 Neurospora crassa OR74A linkage group I, whole genome shotgun sequence	752500	753500	0.43	1.41	-0.97	49.6
NC_026501.1 Neurospora crassa OR74A linkage group I, whole genome shotgun sequence	753000	754000	0.75	1.3	-0.55	54.8
NC_026501.1 Neurospora crassa OR74A linkage group I, whole genome shotgun sequence	753500	754500	0.96	1.21	-0.25	59
NC_026501.1 Neurospora crassa OR74A linkage group I, whole genome shotgun sequence	754000	755000	0.79	1.12	-0.33	55.6
NC_026501.1 Neurospora crassa OR74A linkage group I, whole genome shotgun sequence	754500	755500	0.61	1.17	-0.56	54.8
NC_026501.1 Neurospora crassa OR74A linkage group I, whole genome shotgun sequence	755000	756000	0.61	1.22	-0.6	54.9
NC_026501.1 Neurospora crassa OR74A linkage group I, whole genome shotgun sequence	755500	756500	0.76	1.23	-0.47	48.2
NC_026501.1 Neurospora crassa OR74A linkage group I, whole genome shotgun sequence	756000	757000	0.79	1.15	-0.35	45.1
NC_026501.1 Neurospora crassa OR74A linkage group I, whole genome shotgun sequence	756500	757500	0.71	1.15	-0.44	50.1
NC_026501.1 Neurospora crassa OR74A linkage group I, whole genome shotgun sequence	757000	758000	0.69	1.26	-0.58	47.6
NC_026501.1 Neurospora crassa OR74A linkage group I, whole genome shotgun sequence	757500	758500	0.89	1.13	-0.24	43.6
NC_026501.1 Neurospora crassa OR74A linkage group I, whole genome shotgun sequence	758000	759000	0.93	1.15	-0.22	42.7
NC_026501.1 Neurospora crassa OR74A linkage group I, whole genome shotgun sequence	758500	759500	0.57	1.19	-0.61	49.9
NC_026501.1 Neurospora crassa OR74A linkage group I, whole genome shotgun sequence	759000	760000	0.64	1.16	-0.52	51.7
NC_026501.1 Neurospora crassa OR74A linkage group I, whole genome shotgun sequence	759500	760500	0.85	1.17	-0.32	44.2
NC_026501.1 Neurospora crassa OR74A linkage group I, whole genome shotgun sequence	760000	761000	0.93	1.12	-0.19	45.2
NC_026501.1 Neurospora crassa OR74A linkage group I, whole genome shotgun sequence	760500	761500	0.83	1.17	-0.34	47.4
NC_026501.1 Neurospora crassa OR74A linkage group I, whole genome shotgun sequence	761000	762000	0.66	1.25	-0.59	50.1
NC_026501.1 Neurospora crassa OR74A linkage group I, whole genome shotgun sequence	761500	762500	0.59	1.25	-0.66	49.2
NC_026501.1 Neurospora crassa OR74A linkage group I, whole genome shotgun sequence	762000	763000	0.78	1.22	-0.44	45.9
NC_026501.1 Neurospora crassa OR74A linkage group I, whole genome shotgun sequence	762500	763500	1.12	1.02	0.11	46.2
NC_026501.1 Neurospora crassa OR74A linkage group I, whole genome shotgun sequence	763000	764000	1.16	0.94	0.22	46.7
NC_026501.1 Neurospora crassa OR74A linkage group I, whole genome shotgun sequence	763500	764500	0.64	1.22	-0.58	45.8
NC_026501.1 Neurospora crassa OR74A linkage group I, whole genome shotgun sequence	764000	765000	0.42	1.51	-1.09	49.1
NC_026501.1 Neurospora crassa OR74A linkage group I, whole genome shotgun sequence	764500	765500	0.47	1.25	-0.78	50.5
NC_026501.1 Neurospora crassa OR74A linkage group I, whole genome shotgun sequence	765000	766000	0.44	1.22	-0.78	51.8
NC_026501.1 Neurospora crassa OR74A linkage group I, whole genome shotgun sequence	765500	766500	0.44	1.31	-0.88	52.3
NC_026501.1 Neurospora crassa OR74A linkage group I, whole genome shotgun sequence	766000	767000	0.47	1.32	-0.85	47.3
NC_026501.1 Neurospora crassa OR74A linkage group I, whole genome shotgun sequence	766500	767500	0.56	1.28	-0.72	42.9
NC_026501.1 Neurospora crassa OR74A linkage group I, whole genome shotgun sequence	767000	768000	0.87	1.08	-0.21	43.1
NC_026501.1 Neurospora crassa OR74A linkage group I, whole genome shotgun sequence	767500	768500	0.93	0.95	-0.02	48.5
NC_026501.1 Neurospora crassa OR74A linkage group I, whole genome shotgun sequence	768000	769000	0.7	0.97	-0.27	54.7
NC_026501.1 Neurospora crassa OR74A linkage group I, whole genome shotgun sequence	768500	769500	0.61	0.99	-0.38	56
NC_026501.1 Neurospora crassa OR74A linkage group I, whole genome shotgun sequence	769000	770000	0.59	1.04	-0.45	52.5
NC_026501.1 Neurospora crassa OR74A linkage group I, whole genome shotgun sequence	769500	770500	0.48	1.16	-0.67	51
NC_026501.1 Neurospora crassa OR74A linkage group I, whole genome shotgun sequence	770000	771000	0.45	1.34	-0.89	47.9
NC_026501.1 Neurospora crassa OR74A linkage group I, whole genome shotgun sequence	770500	771500	0.51	1.26	-0.74	47.1
NC_026501.1 Neurospora crassa OR74A linkage group I, whole genome shotgun sequence	771000	772000	0.79	0.98	-0.19	51.8
NC_026501.1 Neurospora crassa OR74A linkage group I, whole genome shotgun sequence	771500	772500	0.81	1.12	-0.3	46
NC_026501.1 Neurospora crassa OR74A linkage group I, whole genome shotgun sequence	772000	773000	0.8	1.19	-0.38	34.6
NC_026501.1 Neurospora crassa OR74A linkage group I, whole genome shotgun sequence	772500	773500	0.94	1.14	-0.2	34.2
NC_026501.1 Neurospora crassa OR74A linkage group I, whole genome shotgun sequence	773000	774000	0.85	1.2	-0.35	44.4
NC_026501.1 Neurospora crassa OR74A linkage group I, whole genome shotgun sequence	773500	774500	0.98	1.11	-0.14	42.4
NC_026501.1 Neurospora crassa OR74A linkage group I, whole genome shotgun sequence	774000	775000	0.85	1.01	-0.16	37.9
NC_026501.1 Neurospora crassa OR74A linkage group I, whole genome shotgun sequence	774500	775500	0.69	1.09	-0.39	45.3
NC_026501.1 Neurospora crassa OR74A linkage group I, whole genome shotgun sequence	775000	776000	0.58	1.2	-0.62	54.3
NC_026501.1 Neurospora crassa OR74A linkage group I, whole genome shotgun sequence	775500	776500	0.56	1.29	-0.74	58.1
NC_026501.1 Neurospora crassa OR74A linkage group I, whole genome shotgun sequence	776000	777000	0.58	1.4	-0.82	55.1
NC_026501.1 Neurospora crassa OR74A linkage group I, whole genome shotgun sequence	776500	777500	0.57	1.3	-0.73	54.7
NC_026501.1 Neurospora crassa OR74A linkage group I, whole genome shotgun sequence	777000	778000	0.56	1.29	-0.73	50.1
NC_026501.1 Neurospora crassa OR74A linkage group I, whole genome shotgun sequence	777500	778500	0.65	1.2	-0.55	48
NC_026501.1 Neurospora crassa OR74A linkage group I, whole genome shotgun sequence	778000	779000	0.85	1.05	-0.19	44.1
NC_026501.1 Neurospora crassa OR74A linkage group I, whole genome shotgun sequence	778500	779500	0.74	1.14	-0.4	43.9
NC_026501.1 Neurospora crassa OR74A linkage group I, whole genome shotgun sequence	779000	780000	0.82	1.12	-0.3	51.9
NC_026501.1 Neurospora crassa OR74A linkage group I, whole genome shotgun sequence	779500	780500	0.69	1.22	-0.53	52.8
NC_026501.1 Neurospora crassa OR74A linkage group I, whole genome shotgun sequence	780000	781000	0.54	1.3	-0.76	51.8
NC_026501.1 Neurospora crassa OR74A linkage group I, whole genome shotgun sequence	780500	781500	0.8	1.23	-0.43	48.5
NC_026501.1 Neurospora crassa OR74A linkage group I, whole genome shotgun sequence	781000	782000	0.94	1.21	-0.27	46
NC_026501.1 Neurospora crassa OR74A linkage group I, whole genome shotgun sequence	781500	782500	1.02	0.98	0.04	44.8
NC_026501.1 Neurospora crassa OR74A linkage group I, whole genome shotgun sequence	782000	783000	0.9	1.04	-0.14	47.6
NC_026501.1 Neurospora crassa OR74A linkage group I, whole genome shotgun sequence	782500	783500	0.91	1.11	-0.2	48
NC_026501.1 Neurospora crassa OR74A linkage group I, whole genome shotgun sequence	783000	784000	0.96	1.02	-0.06	48.4
NC_026501.1 Neurospora crassa OR74A linkage group I, whole genome shotgun sequence	783500	784500	0.72	1.08	-0.36	50.6
NC_026501.1 Neurospora crassa OR74A linkage group I, whole genome shotgun sequence	784000	785000	0.55	1.29	-0.74	43.5
NC_026501.1 Neurospora crassa OR74A linkage group I, whole genome shotgun sequence	784500	785500	0.62	1.43	-0.81	45.4
NC_026501.1 Neurospora crassa OR74A linkage group I, whole genome shotgun sequence	785000	786000	0.75	1.14	-0.39	53.8
NC_026501.1 Neurospora crassa OR74A linkage group I, whole genome shotgun sequence	785500	786500	0.63	1.05	-0.42	54.4
NC_026501.1 Neurospora crassa OR74A linkage group I, whole genome shotgun sequence	786000	787000	0.69	1.18	-0.49	50.6
NC_026501.1 Neurospora crassa OR74A linkage group I, whole genome shotgun sequence	786500	787500	0.68	1.11	-0.42	50.1
NC_026501.1 Neurospora crassa OR74A linkage group I, whole genome shotgun sequence	787000	788000	0.64	1.09	-0.45	45.1
NC_026501.1 Neurospora crassa OR74A linkage group I, whole genome shotgun sequence	787500	788500	0.71	1.25	-0.54	38.6
NC_026501.1 Neurospora crassa OR74A linkage group I, whole genome shotgun sequence	788000	789000	0.58	1.37	-0.79	42
NC_026501.1 Neurospora crassa OR74A linkage group I, whole genome shotgun sequence	788500	789500	0.6	1.3	-0.7	43
NC_026501.1 Neurospora crassa OR74A linkage group I, whole genome shotgun sequence	789000	790000	0.62	1.25	-0.63	45.7
NC_026501.1 Neurospora crassa OR74A linkage group I, whole genome shotgun sequence	789500	790500	0.7	1.15	-0.45	47.5
NC_026501.1 Neurospora crassa OR74A linkage group I, whole genome shotgun sequence	790000	791000	0.75	1.09	-0.34	46
NC_026501.1 Neurospora crassa OR74A linkage group I, whole genome shotgun sequence	790500	791500	0.53	1.24	-0.71	51
NC_026501.1 Neurospora crassa OR74A linkage group I, whole genome shotgun sequence	791000	792000	0.45	1.23	-0.77	51.2
NC_026501.1 Neurospora crassa OR74A linkage group I, whole genome shotgun sequence	791500	792500	0.55	1.25	-0.69	46.7
NC_026501.1 Neurospora crassa OR74A linkage group I, whole genome shotgun sequence	792000	793000	0.7	1.31	-0.62	47.7
NC_026501.1 Neurospora crassa OR74A linkage group I, whole genome shotgun sequence	792500	793500	0.7	1.28	-0.58	47.1
NC_026501.1 Neurospora crassa OR74A linkage group I, whole genome shotgun sequence	793000	794000	0.59	1.26	-0.67	49
NC_026501.1 Neurospora crassa OR74A linkage group I, whole genome shotgun sequence	793500	794500	0.46	1.36	-0.9	46.9
NC_026501.1 Neurospora crassa OR74A linkage group I, whole genome shotgun sequence	794000	795000	0.41	1.27	-0.86	35.2
NC_026501.1 Neurospora crassa OR74A linkage group I, whole genome shotgun sequence	794500	795500	0.65	1.1	-0.45	38.4
NC_026501.1 Neurospora crassa OR74A linkage group I, whole genome shotgun sequence	795000	796000	0.92	1.05	-0.13	49.6
NC_026501.1 Neurospora crassa OR74A linkage group I, whole genome shotgun sequence	795500	796500	0.92	1.03	-0.11	51.3
NC_026501.1 Neurospora crassa OR74A linkage group I, whole genome shotgun sequence	796000	797000	0.88	1.03	-0.15	48.5
NC_026501.1 Neurospora crassa OR74A linkage group I, whole genome shotgun sequence	796500	797500	0.87	1.09	-0.22	52.5
NC_026501.1 Neurospora crassa OR74A linkage group I, whole genome shotgun sequence	797000	798000	0.51	1.2	-0.7	50.8
NC_026501.1 Neurospora crassa OR74A linkage group I, whole genome shotgun sequence	797500	798500	0.61	1.15	-0.54	45.8
NC_026501.1 Neurospora crassa OR74A linkage group I, whole genome shotgun sequence	798000	799000	0.76	1.06	-0.3	47
NC_026501.1 Neurospora crassa OR74A linkage group I, whole genome shotgun sequence	798500	799500	0.77	1.01	-0.24	43.7
NC_026501.1 Neurospora crassa OR74A linkage group I, whole genome shotgun sequence	799000	800000	0.8	1.11	-0.31	39.3
NC_026501.1 Neurospora crassa OR74A linkage group I, whole genome shotgun sequence	799500	800500	0.75	1.24	-0.49	39.2
NC_026501.1 Neurospora crassa OR74A linkage group I, whole genome shotgun sequence	800000	801000	0.81	1.17	-0.36	50.3
NC_026501.1 Neurospora crassa OR74A linkage group I, whole genome shotgun sequence	800500	801500	1.05	1.1	-0.05	53.6
NC_026501.1 Neurospora crassa OR74A linkage group I, whole genome shotgun sequence	801000	802000	0.79	1.13	-0.34	49.1
NC_026501.1 Neurospora crassa OR74A linkage group I, whole genome shotgun sequence	801500	802500	0.72	1.2	-0.48	46.3
NC_026501.1 Neurospora crassa OR74A linkage group I, whole genome shotgun sequence	802000	803000	0.73	1.12	-0.38	43.5
NC_026501.1 Neurospora crassa OR74A linkage group I, whole genome shotgun sequence	802500	803500	0.58	1.14	-0.55	45
NC_026501.1 Neurospora crassa OR74A linkage group I, whole genome shotgun sequence	803000	804000	0.57	1.27	-0.71	47.9
NC_026501.1 Neurospora crassa OR74A linkage group I, whole genome shotgun sequence	803500	804500	0.55	1.39	-0.84	47.6
NC_026501.1 Neurospora crassa OR74A linkage group I, whole genome shotgun sequence	804000	805000	0.47	1.31	-0.84	49.2
NC_026501.1 Neurospora crassa OR74A linkage group I, whole genome shotgun sequence	804500	805500	0.38	1.31	-0.94	49.3
NC_026501.1 Neurospora crassa OR74A linkage group I, whole genome shotgun sequence	805000	806000	0.42	1.46	-1.03	49.5
NC_026501.1 Neurospora crassa OR74A linkage group I, whole genome shotgun sequence	805500	806500	0.56	1.36	-0.8	49.7
NC_026501.1 Neurospora crassa OR74A linkage group I, whole genome shotgun sequence	806000	807000	0.6	1.33	-0.73	48.7
NC_026501.1 Neurospora crassa OR74A linkage group I, whole genome shotgun sequence	806500	807500	0.51	1.32	-0.81	49.9
NC_026501.1 Neurospora crassa OR74A linkage group I, whole genome shotgun sequence	807000	808000	0.61	1.26	-0.66	48.8
NC_026501.1 Neurospora crassa OR74A linkage group I, whole genome shotgun sequence	807500	808500	0.57	1.26	-0.69	51.2
NC_026501.1 Neurospora crassa OR74A linkage group I, whole genome shotgun sequence	808000	809000	0.77	1.02	-0.25	48.6
NC_026501.1 Neurospora crassa OR74A linkage group I, whole genome shotgun sequence	808500	809500	1	0.87	0.13	47.7
NC_026501.1 Neurospora crassa OR74A linkage group I, whole genome shotgun sequence	809000	810000	0.67	1.23	-0.56	52.7
NC_026501.1 Neurospora crassa OR74A linkage group I, whole genome shotgun sequence	809500	810500	0.52	1.63	-1.11	56.7
NC_026501.1 Neurospora crassa OR74A linkage group I, whole genome shotgun sequence	810000	811000	0.58	1.38	-0.8	56
NC_026501.1 Neurospora crassa OR74A linkage group I, whole genome shotgun sequence	810500	811500	0.69	1.28	-0.59	49.9
NC_026501.1 Neurospora crassa OR74A linkage group I, whole genome shotgun sequence	811000	812000	0.68	1.23	-0.55	47.2
NC_026501.1 Neurospora crassa OR74A linkage group I, whole genome shotgun sequence	811500	812500	0.63	1.09	-0.46	46.5
NC_026501.1 Neurospora crassa OR74A linkage group I, whole genome shotgun sequence	812000	813000	0.6	1.08	-0.48	47.9
NC_026501.1 Neurospora crassa OR74A linkage group I, whole genome shotgun sequence	812500	813500	0.64	1.1	-0.46	50
NC_026501.1 Neurospora crassa OR74A linkage group I, whole genome shotgun sequence	813000	814000	0.82	1.06	-0.24	48.7
NC_026501.1 Neurospora crassa OR74A linkage group I, whole genome shotgun sequence	813500	814500	0.94	1.1	-0.16	44.2
NC_026501.1 Neurospora crassa OR74A linkage group I, whole genome shotgun sequence	814000	815000	0.78	1.21	-0.42	40.5
NC_026501.1 Neurospora crassa OR74A linkage group I, whole genome shotgun sequence	814500	815500	0.76	1.19	-0.44	39.4
NC_026501.1 Neurospora crassa OR74A linkage group I, whole genome shotgun sequence	815000	816000	0.79	1.14	-0.36	41.9
NC_026501.1 Neurospora crassa OR74A linkage group I, whole genome shotgun sequence	815500	816500	0.59	1.31	-0.72	47.8
NC_026501.1 Neurospora crassa OR74A linkage group I, whole genome shotgun sequence	816000	817000	0.37	1.32	-0.95	51.6
NC_026501.1 Neurospora crassa OR74A linkage group I, whole genome shotgun sequence	816500	817500	0.48	1.21	-0.73	53.5
NC_026501.1 Neurospora crassa OR74A linkage group I, whole genome shotgun sequence	817000	818000	0.54	1.23	-0.7	54.1
NC_026501.1 Neurospora crassa OR74A linkage group I, whole genome shotgun sequence	817500	818500	0.47	1.25	-0.78	52.4
NC_026501.1 Neurospora crassa OR74A linkage group I, whole genome shotgun sequence	818000	819000	0.52	1.32	-0.8	48.4
NC_026501.1 Neurospora crassa OR74A linkage group I, whole genome shotgun sequence	818500	819500	0.68	1.25	-0.57	43.9
NC_026501.1 Neurospora crassa OR74A linkage group I, whole genome shotgun sequence	819000	820000	0.75	1.16	-0.42	42.2
NC_026501.1 Neurospora crassa OR74A linkage group I, whole genome shotgun sequence	819500	820500	0.6	1.2	-0.6	44
NC_026501.1 Neurospora crassa OR74A linkage group I, whole genome shotgun sequence	820000	821000	0.67	1.18	-0.51	46.1
NC_026501.1 Neurospora crassa OR74A linkage group I, whole genome shotgun sequence	820500	821500	0.67	1.18	-0.52	49.8
NC_026501.1 Neurospora crassa OR74A linkage group I, whole genome shotgun sequence	821000	822000	0.58	1.26	-0.68	50.7
NC_026501.1 Neurospora crassa OR74A linkage group I, whole genome shotgun sequence	821500	822500	0.51	1.21	-0.7	48.4
NC_026501.1 Neurospora crassa OR74A linkage group I, whole genome shotgun sequence	822000	823000	0.49	1.09	-0.6	44.4
NC_026501.1 Neurospora crassa OR74A linkage group I, whole genome shotgun sequence	822500	823500	0.68	1.08	-0.4	42.3
NC_026501.1 Neurospora crassa OR74A linkage group I, whole genome shotgun sequence	823000	824000	0.71	1.1	-0.39	39.6
NC_026501.1 Neurospora crassa OR74A linkage group I, whole genome shotgun sequence	823500	824500	0.44	1.37	-0.94	46.6
NC_026501.1 Neurospora crassa OR74A linkage group I, whole genome shotgun sequence	824000	825000	0.54	1.38	-0.83	52.2
NC_026501.1 Neurospora crassa OR74A linkage group I, whole genome shotgun sequence	824500	825500	0.79	1.2	-0.41	47.7
NC_026501.1 Neurospora crassa OR74A linkage group I, whole genome shotgun sequence	825000	826000	0.72	1.1	-0.38	44.9
NC_026501.1 Neurospora crassa OR74A linkage group I, whole genome shotgun sequence	825500	826500	0.71	1	-0.29	47.1
NC_026501.1 Neurospora crassa OR74A linkage group I, whole genome shotgun sequence	826000	827000	0.8	0.98	-0.17	49
NC_026501.1 Neurospora crassa OR74A linkage group I, whole genome shotgun sequence	826500	827500	0.67	1.13	-0.47	47.5
NC_026501.1 Neurospora crassa OR74A linkage group I, whole genome shotgun sequence	827000	828000	0.5	1.28	-0.78	50.5
NC_026501.1 Neurospora crassa OR74A linkage group I, whole genome shotgun sequence	827500	828500	0.6	1.14	-0.53	51.2
NC_026501.1 Neurospora crassa OR74A linkage group I, whole genome shotgun sequence	828000	829000	0.59	1.15	-0.56	52.2
NC_026501.1 Neurospora crassa OR74A linkage group I, whole genome shotgun sequence	828500	829500	0.48	1.34	-0.86	49.6
NC_026501.1 Neurospora crassa OR74A linkage group I, whole genome shotgun sequence	829000	830000	0.49	1.3	-0.81	49.4
NC_026501.1 Neurospora crassa OR74A linkage group I, whole genome shotgun sequence	829500	830500	0.52	1.27	-0.75	47.7
NC_026501.1 Neurospora crassa OR74A linkage group I, whole genome shotgun sequence	830000	831000	0.64	1.21	-0.57	45
NC_026501.1 Neurospora crassa OR74A linkage group I, whole genome shotgun sequence	830500	831500	0.63	1.26	-0.63	51.9
NC_026501.1 Neurospora crassa OR74A linkage group I, whole genome shotgun sequence	831000	832000	0.56	1.52	-0.96	51.7
NC_026501.1 Neurospora crassa OR74A linkage group I, whole genome shotgun sequence	831500	832500	0.61	1.32	-0.71	48.1
NC_026501.1 Neurospora crassa OR74A linkage group I, whole genome shotgun sequence	832000	833000	0.51	1.23	-0.72	52.6
NC_026501.1 Neurospora crassa OR74A linkage group I, whole genome shotgun sequence	832500	833500	0.38	1.51	-1.13	53.9
NC_026501.1 Neurospora crassa OR74A linkage group I, whole genome shotgun sequence	833000	834000	0.37	1.6	-1.22	56.8
NC_026501.1 Neurospora crassa OR74A linkage group I, whole genome shotgun sequence	833500	834500	0.59	1.28	-0.69	55.3
NC_026501.1 Neurospora crassa OR74A linkage group I, whole genome shotgun sequence	834000	835000	0.97	1.14	-0.17	49.9
NC_026501.1 Neurospora crassa OR74A linkage group I, whole genome shotgun sequence	834500	835500	0.86	1.23	-0.36	50.8
NC_026501.1 Neurospora crassa OR74A linkage group I, whole genome shotgun sequence	835000	836000	0.74	1.16	-0.42	49.5
NC_026501.1 Neurospora crassa OR74A linkage group I, whole genome shotgun sequence	835500	836500	0.72	1.1	-0.38	43.9
NC_026501.1 Neurospora crassa OR74A linkage group I, whole genome shotgun sequence	836000	837000	0.59	1.22	-0.62	48.5
NC_026501.1 Neurospora crassa OR74A linkage group I, whole genome shotgun sequence	836500	837500	0.43	1.19	-0.76	56.1
NC_026501.1 Neurospora crassa OR74A linkage group I, whole genome shotgun sequence	837000	838000	0.74	1.17	-0.43	47.9
NC_026501.1 Neurospora crassa OR74A linkage group I, whole genome shotgun sequence	837500	838500	0.77	1.25	-0.47	44.5
NC_026501.1 Neurospora crassa OR74A linkage group I, whole genome shotgun sequence	838000	839000	0.74	1.22	-0.49	45.1
NC_026501.1 Neurospora crassa OR74A linkage group I, whole genome shotgun sequence	838500	839500	0.6	1.26	-0.66	45.1
NC_026501.1 Neurospora crassa OR74A linkage group I, whole genome shotgun sequence	839000	840000	0.44	1.4	-0.95	44.3
NC_026501.1 Neurospora crassa OR74A linkage group I, whole genome shotgun sequence	839500	840500	0.6	1.33	-0.74	42.7
NC_026501.1 Neurospora crassa OR74A linkage group I, whole genome shotgun sequence	840000	841000	0.7	1.31	-0.62	50.1
NC_026501.1 Neurospora crassa OR74A linkage group I, whole genome shotgun sequence	840500	841500	0.79	1.14	-0.34	49.6
NC_026501.1 Neurospora crassa OR74A linkage group I, whole genome shotgun sequence	841000	842000	0.91	1	-0.09	50.1
NC_026501.1 Neurospora crassa OR74A linkage group I, whole genome shotgun sequence	841500	842500	0.58	1.14	-0.56	46.4
NC_026501.1 Neurospora crassa OR74A linkage group I, whole genome shotgun sequence	842000	843000	0.43	1.39	-0.96	39.7
NC_026501.1 Neurospora crassa OR74A linkage group I, whole genome shotgun sequence	842500	843500	0.65	1.12	-0.46	46.7
NC_026501.1 Neurospora crassa OR74A linkage group I, whole genome shotgun sequence	843000	844000	0.8	1.06	-0.26	49.9
NC_026501.1 Neurospora crassa OR74A linkage group I, whole genome shotgun sequence	843500	844500	0.49	1.38	-0.88	53.4
NC_026501.1 Neurospora crassa OR74A linkage group I, whole genome shotgun sequence	844000	845000	0.39	1.34	-0.95	54.9
NC_026501.1 Neurospora crassa OR74A linkage group I, whole genome shotgun sequence	844500	845500	0.46	1.5	-1.04	52.8
NC_026501.1 Neurospora crassa OR74A linkage group I, whole genome shotgun sequence	845000	846000	0.46	1.46	-1	53.6
NC_026501.1 Neurospora crassa OR74A linkage group I, whole genome shotgun sequence	845500	846500	0.69	1.25	-0.56	51.8
NC_026501.1 Neurospora crassa OR74A linkage group I, whole genome shotgun sequence	846000	847000	0.83	1.14	-0.31	47.8
NC_026501.1 Neurospora crassa OR74A linkage group I, whole genome shotgun sequence	846500	847500	0.84	1.07	-0.24	43
NC_026501.1 Neurospora crassa OR74A linkage group I, whole genome shotgun sequence	847000	848000	0.71	1.2	-0.49	36.4
NC_026501.1 Neurospora crassa OR74A linkage group I, whole genome shotgun sequence	847500	848500	0.62	1.22	-0.6	42.9
NC_026501.1 Neurospora crassa OR74A linkage group I, whole genome shotgun sequence	848000	849000	0.54	1.2	-0.66	52.5
NC_026501.1 Neurospora crassa OR74A linkage group I, whole genome shotgun sequence	848500	849500	0.63	1.19	-0.56	50.8
NC_026501.1 Neurospora crassa OR74A linkage group I, whole genome shotgun sequence	849000	850000	0.61	1.2	-0.59	48.6
NC_026501.1 Neurospora crassa OR74A linkage group I, whole genome shotgun sequence	849500	850500	0.4	1.31	-0.92	48.8
NC_026501.1 Neurospora crassa OR74A linkage group I, whole genome shotgun sequence	850000	851000	0.55	1.46	-0.9	47.5
NC_026501.1 Neurospora crassa OR74A linkage group I, whole genome shotgun sequence	850500	851500	0.75	1.28	-0.53	48.5
NC_026501.1 Neurospora crassa OR74A linkage group I, whole genome shotgun sequence	851000	852000	0.88	1.07	-0.2	51.8
NC_026501.1 Neurospora crassa OR74A linkage group I, whole genome shotgun sequence	851500	852500	0.93	1.17	-0.24	49.7
NC_026501.1 Neurospora crassa OR74A linkage group I, whole genome shotgun sequence	852000	853000	0.84	1.34	-0.5	44.4
NC_026501.1 Neurospora crassa OR74A linkage group I, whole genome shotgun sequence	852500	853500	0.87	1.2	-0.33	45.2
NC_026501.1 Neurospora crassa OR74A linkage group I, whole genome shotgun sequence	853000	854000	0.86	1.11	-0.26	48.1
NC_026501.1 Neurospora crassa OR74A linkage group I, whole genome shotgun sequence	853500	854500	0.67	1.11	-0.43	39
NC_026501.1 Neurospora crassa OR74A linkage group I, whole genome shotgun sequence	854000	855000	0.5	1.06	-0.56	38.5
NC_026501.1 Neurospora crassa OR74A linkage group I, whole genome shotgun sequence	854500	855500	0.54	1.15	-0.61	47.7
NC_026501.1 Neurospora crassa OR74A linkage group I, whole genome shotgun sequence	855000	856000	0.82	1.06	-0.24	49.3
NC_026501.1 Neurospora crassa OR74A linkage group I, whole genome shotgun sequence	855500	856500	0.97	0.85	0.12	51.2
NC_026501.1 Neurospora crassa OR74A linkage group I, whole genome shotgun sequence	856000	857000	0.82	1.04	-0.22	54.6
NC_026501.1 Neurospora crassa OR74A linkage group I, whole genome shotgun sequence	856500	857500	0.69	1.21	-0.51	54.1
NC_026501.1 Neurospora crassa OR74A linkage group I, whole genome shotgun sequence	857000	858000	0.69	1.12	-0.43	51.5
NC_026501.1 Neurospora crassa OR74A linkage group I, whole genome shotgun sequence	857500	858500	0.69	1.25	-0.56	48.5
NC_026501.1 Neurospora crassa OR74A linkage group I, whole genome shotgun sequence	858000	859000	0.65	1.35	-0.7	46.8
NC_026501.1 Neurospora crassa OR74A linkage group I, whole genome shotgun sequence	858500	859500	0.61	1.2	-0.58	52
NC_026501.1 Neurospora crassa OR74A linkage group I, whole genome shotgun sequence	859000	860000	0.6	1.17	-0.57	55.4
NC_026501.1 Neurospora crassa OR74A linkage group I, whole genome shotgun sequence	859500	860500	0.69	1.06	-0.37	52.9
NC_026501.1 Neurospora crassa OR74A linkage group I, whole genome shotgun sequence	860000	861000	0.79	1.07	-0.28	49.3
NC_026501.1 Neurospora crassa OR74A linkage group I, whole genome shotgun sequence	860500	861500	0.81	1.11	-0.3	46.5
NC_026501.1 Neurospora crassa OR74A linkage group I, whole genome shotgun sequence	861000	862000	0.73	1.09	-0.36	50
NC_026501.1 Neurospora crassa OR74A linkage group I, whole genome shotgun sequence	861500	862500	0.54	1.18	-0.64	50.5
NC_026501.1 Neurospora crassa OR74A linkage group I, whole genome shotgun sequence	862000	863000	0.54	1.21	-0.67	47.8
NC_026501.1 Neurospora crassa OR74A linkage group I, whole genome shotgun sequence	862500	863500	0.66	1.22	-0.56	46.1
NC_026501.1 Neurospora crassa OR74A linkage group I, whole genome shotgun sequence	863000	864000	0.77	1.2	-0.43	45
NC_026501.1 Neurospora crassa OR74A linkage group I, whole genome shotgun sequence	863500	864500	0.68	1.25	-0.57	44.3
NC_026501.1 Neurospora crassa OR74A linkage group I, whole genome shotgun sequence	864000	865000	0.6	1.38	-0.78	47.3
NC_026501.1 Neurospora crassa OR74A linkage group I, whole genome shotgun sequence	864500	865500	0.44	1.47	-1.03	55
NC_026501.1 Neurospora crassa OR74A linkage group I, whole genome shotgun sequence	865000	866000	0.32	1.62	-1.3	56.6
NC_026501.1 Neurospora crassa OR74A linkage group I, whole genome shotgun sequence	865500	866500	0.49	1.59	-1.1	54.9
NC_026501.1 Neurospora crassa OR74A linkage group I, whole genome shotgun sequence	866000	867000	0.42	1.55	-1.13	54.3
NC_026501.1 Neurospora crassa OR74A linkage group I, whole genome shotgun sequence	866500	867500	0.48	1.43	-0.94	53.9
NC_026501.1 Neurospora crassa OR74A linkage group I, whole genome shotgun sequence	867000	868000	0.78	1.32	-0.54	51.9
NC_026501.1 Neurospora crassa OR74A linkage group I, whole genome shotgun sequence	867500	868500	0.71	1.25	-0.54	49.8
NC_026501.1 Neurospora crassa OR74A linkage group I, whole genome shotgun sequence	868000	869000	0.76	1.23	-0.47	53
NC_026501.1 Neurospora crassa OR74A linkage group I, whole genome shotgun sequence	868500	869500	0.57	1.37	-0.81	54.5
NC_026501.1 Neurospora crassa OR74A linkage group I, whole genome shotgun sequence	869000	870000	0.49	1.42	-0.93	54
NC_026501.1 Neurospora crassa OR74A linkage group I, whole genome shotgun sequence	869500	870500	0.5	1.33	-0.83	54.6
NC_026501.1 Neurospora crassa OR74A linkage group I, whole genome shotgun sequence	870000	871000	0.56	1.26	-0.7	54.1
NC_026501.1 Neurospora crassa OR74A linkage group I, whole genome shotgun sequence	870500	871500	0.74	1.13	-0.4	54.9
NC_026501.1 Neurospora crassa OR74A linkage group I, whole genome shotgun sequence	871000	872000	0.97	0.96	0	48.7
NC_026501.1 Neurospora crassa OR74A linkage group I, whole genome shotgun sequence	871500	872500	1	0.96	0.04	42.7
NC_026501.1 Neurospora crassa OR74A linkage group I, whole genome shotgun sequence	872000	873000	1.03	0.91	0.12	28
NC_026501.1 Neurospora crassa OR74A linkage group I, whole genome shotgun sequence	872500	873500	1.28	0.43	0.85	8.1
NC_026501.1 Neurospora crassa OR74A linkage group I, whole genome shotgun sequence	873000	874000	1.45	0.28	1.17	7.1
NC_026501.1 Neurospora crassa OR74A linkage group I, whole genome shotgun sequence	873500	874500	1.55	0.31	1.24	12.9
NC_026501.1 Neurospora crassa OR74A linkage group I, whole genome shotgun sequence	874000	875000	1.43	0.33	1.1	12.6
NC_026501.1 Neurospora crassa OR74A linkage group I, whole genome shotgun sequence	874500	875500	1.38	0.33	1.04	7.9
NC_026501.1 Neurospora crassa OR74A linkage group I, whole genome shotgun sequence	875000	876000	1.41	0.67	0.74	16.7
NC_026501.1 Neurospora crassa OR74A linkage group I, whole genome shotgun sequence	875500	876500	1.24	0.73	0.51	21.4
NC_026501.1 Neurospora crassa OR74A linkage group I, whole genome shotgun sequence	876000	877000	1.2	0.55	0.65	13.1
NC_026501.1 Neurospora crassa OR74A linkage group I, whole genome shotgun sequence	876500	877500	1.32	0.46	0.86	9.5
NC_026501.1 Neurospora crassa OR74A linkage group I, whole genome shotgun sequence	877000	878000	1.28	0.77	0.51	16.2
NC_026501.1 Neurospora crassa OR74A linkage group I, whole genome shotgun sequence	877500	878500	1.4	0.78	0.63	21
NC_026501.1 Neurospora crassa OR74A linkage group I, whole genome shotgun sequence	878000	879000	2.09	0.38	1.7	18.2
NC_026501.1 Neurospora crassa OR74A linkage group I, whole genome shotgun sequence	878500	879500	2.11	0.27	1.84	18.3
NC_026501.1 Neurospora crassa OR74A linkage group I, whole genome shotgun sequence	879000	880000	1.33	0.52	0.81	18.5
NC_026501.1 Neurospora crassa OR74A linkage group I, whole genome shotgun sequence	879500	880500	1.2	0.43	0.77	16.6
NC_026501.1 Neurospora crassa OR74A linkage group I, whole genome shotgun sequence	880000	881000	1.35	0.29	1.06	15.3
NC_026501.1 Neurospora crassa OR74A linkage group I, whole genome shotgun sequence	880500	881500	1.48	0.48	1	19.4
NC_026501.1 Neurospora crassa OR74A linkage group I, whole genome shotgun sequence	881000	882000	1.54	0.53	1.02	15.1
NC_026501.1 Neurospora crassa OR74A linkage group I, whole genome shotgun sequence	881500	882500	1.42	0.4	1.02	12.1
NC_026501.1 Neurospora crassa OR74A linkage group I, whole genome shotgun sequence	882000	883000	1.26	0.53	0.73	14.2
NC_026501.1 Neurospora crassa OR74A linkage group I, whole genome shotgun sequence	882500	883500	1.34	0.47	0.87	13.4
NC_026501.1 Neurospora crassa OR74A linkage group I, whole genome shotgun sequence	883000	884000	1.51	0.33	1.19	14.6
NC_026501.1 Neurospora crassa OR74A linkage group I, whole genome shotgun sequence	883500	884500	1.3	0.55	0.75	17
NC_026501.1 Neurospora crassa OR74A linkage group I, whole genome shotgun sequence	884000	885000	1.4	0.56	0.84	19.2
NC_026501.1 Neurospora crassa OR74A linkage group I, whole genome shotgun sequence	884500	885500	1.74	0.35	1.4	20.1
NC_026501.1 Neurospora crassa OR74A linkage group I, whole genome shotgun sequence	885000	886000	1.55	0.38	1.17	19.1
NC_026501.1 Neurospora crassa OR74A linkage group I, whole genome shotgun sequence	885500	886500	1.71	0.38	1.33	16
NC_026501.1 Neurospora crassa OR74A linkage group I, whole genome shotgun sequence	886000	887000	1.7	0.37	1.33	14.7
NC_026501.1 Neurospora crassa OR74A linkage group I, whole genome shotgun sequence	886500	887500	1.62	0.35	1.28	15.8
NC_026501.1 Neurospora crassa OR74A linkage group I, whole genome shotgun sequence	887000	888000	1.64	0.44	1.19	17.4
NC_026501.1 Neurospora crassa OR74A linkage group I, whole genome shotgun sequence	887500	888500	1.53	0.41	1.12	20.1
NC_026501.1 Neurospora crassa OR74A linkage group I, whole genome shotgun sequence	888000	889000	1.52	0.44	1.08	20.2
NC_026501.1 Neurospora crassa OR74A linkage group I, whole genome shotgun sequence	888500	889500	1.64	0.52	1.11	17.9
NC_026501.1 Neurospora crassa OR74A linkage group I, whole genome shotgun sequence	889000	890000	1.67	0.33	1.34	16.4
NC_026501.1 Neurospora crassa OR74A linkage group I, whole genome shotgun sequence	889500	890500	1.29	0.39	0.9	14.7
NC_026501.1 Neurospora crassa OR74A linkage group I, whole genome shotgun sequence	890000	891000	1.32	0.44	0.88	14.3
NC_026501.1 Neurospora crassa OR74A linkage group I, whole genome shotgun sequence	890500	891500	1.39	0.52	0.86	15.5
NC_026501.1 Neurospora crassa OR74A linkage group I, whole genome shotgun sequence	891000	892000	1.17	0.61	0.56	17.4
NC_026501.1 Neurospora crassa OR74A linkage group I, whole genome shotgun sequence	891500	892500	1.26	0.52	0.73	15.3
NC_026501.1 Neurospora crassa OR74A linkage group I, whole genome shotgun sequence	892000	893000	1.26	0.57	0.69	16.4
NC_026501.1 Neurospora crassa OR74A linkage group I, whole genome shotgun sequence	892500	893500	1.26	0.48	0.78	16.1
NC_026501.1 Neurospora crassa OR74A linkage group I, whole genome shotgun sequence	893000	894000	1.34	0.33	1.01	16.5
NC_026501.1 Neurospora crassa OR74A linkage group I, whole genome shotgun sequence	893500	894500	1.23	0.44	0.79	21
NC_026501.1 Neurospora crassa OR74A linkage group I, whole genome shotgun sequence	894000	895000	1.27	0.61	0.66	19
NC_026501.1 Neurospora crassa OR74A linkage group I, whole genome shotgun sequence	894500	895500	1.51	0.6	0.91	15.6
NC_026501.1 Neurospora crassa OR74A linkage group I, whole genome shotgun sequence	895000	896000	1.42	0.46	0.97	12.6
NC_026501.1 Neurospora crassa OR74A linkage group I, whole genome shotgun sequence	895500	896500	1.29	0.62	0.67	12.8
NC_026501.1 Neurospora crassa OR74A linkage group I, whole genome shotgun sequence	896000	897000	1.59	0.54	1.05	18.6
NC_026501.1 Neurospora crassa OR74A linkage group I, whole genome shotgun sequence	896500	897500	1.74	0.42	1.33	22.1
NC_026501.1 Neurospora crassa OR74A linkage group I, whole genome shotgun sequence	897000	898000	1.34	0.64	0.7	20.1
NC_026501.1 Neurospora crassa OR74A linkage group I, whole genome shotgun sequence	897500	898500	1.27	0.64	0.63	15.1
NC_026501.1 Neurospora crassa OR74A linkage group I, whole genome shotgun sequence	898000	899000	1.91	0.18	1.73	13.7
NC_026501.1 Neurospora crassa OR74A linkage group I, whole genome shotgun sequence	898500	899500	1.74	0.07	1.67	13.1
NC_026501.1 Neurospora crassa OR74A linkage group I, whole genome shotgun sequence	899000	900000	1.55	0.27	1.27	11.4
NC_026501.1 Neurospora crassa OR74A linkage group I, whole genome shotgun sequence	899500	900500	1.58	0.38	1.2	11.1
NC_026501.1 Neurospora crassa OR74A linkage group I, whole genome shotgun sequence	900000	901000	1.68	0.33	1.35	9
NC_026501.1 Neurospora crassa OR74A linkage group I, whole genome shotgun sequence	900500	901500	1.67	0.15	1.51	9.2
NC_026501.1 Neurospora crassa OR74A linkage group I, whole genome shotgun sequence	901000	902000	1.59	0.25	1.34	9.6
NC_026501.1 Neurospora crassa OR74A linkage group I, whole genome shotgun sequence	901500	902500	1.69	0.29	1.4	8.7
NC_026501.1 Neurospora crassa OR74A linkage group I, whole genome shotgun sequence	902000	903000	1.55	0.29	1.26	8.7
NC_026501.1 Neurospora crassa OR74A linkage group I, whole genome shotgun sequence	902500	903500	1.46	0.35	1.11	9.9
NC_026501.1 Neurospora crassa OR74A linkage group I, whole genome shotgun sequence	903000	904000	1.59	0.17	1.42	11.2
NC_026501.1 Neurospora crassa OR74A linkage group I, whole genome shotgun sequence	903500	904500	1.64	0.26	1.38	9.3
NC_026501.1 Neurospora crassa OR74A linkage group I, whole genome shotgun sequence	904000	905000	1.33	0.53	0.8	6.6
NC_026501.1 Neurospora crassa OR74A linkage group I, whole genome shotgun sequence	904500	905500	1.12	0.33	0.79	8.9
NC_026501.1 Neurospora crassa OR74A linkage group I, whole genome shotgun sequence	905000	906000	1.09	0.44	0.65	8.3
NC_026501.1 Neurospora crassa OR74A linkage group I, whole genome shotgun sequence	905500	906500	0.97	0.53	0.45	9.8
NC_026501.1 Neurospora crassa OR74A linkage group I, whole genome shotgun sequence	906000	907000	1.14	0.32	0.82	10.7
NC_026501.1 Neurospora crassa OR74A linkage group I, whole genome shotgun sequence	906500	907500	1.5	0.07	1.43	8
NC_026501.1 Neurospora crassa OR74A linkage group I, whole genome shotgun sequence	907000	908000	1.38	0.12	1.26	10
NC_026501.1 Neurospora crassa OR74A linkage group I, whole genome shotgun sequence	907500	908500	1.39	0.26	1.13	8.4
NC_026501.1 Neurospora crassa OR74A linkage group I, whole genome shotgun sequence	908000	909000	1.24	0.59	0.65	6
NC_026501.1 Neurospora crassa OR74A linkage group I, whole genome shotgun sequence	908500	909500	1.3	0.38	0.92	7.9
NC_026501.1 Neurospora crassa OR74A linkage group I, whole genome shotgun sequence	909000	910000	1.69	0.16	1.53	6.7
NC_026501.1 Neurospora crassa OR74A linkage group I, whole genome shotgun sequence	909500	910500	1.7	0.15	1.55	6.2
NC_026501.1 Neurospora crassa OR74A linkage group I, whole genome shotgun sequence	910000	911000	1.46	0.39	1.07	8.7
NC_026501.1 Neurospora crassa OR74A linkage group I, whole genome shotgun sequence	910500	911500	1.48	0.48	1	7.6
NC_026501.1 Neurospora crassa OR74A linkage group I, whole genome shotgun sequence	911000	912000	1.65	0.59	1.06	16.2
NC_026501.1 Neurospora crassa OR74A linkage group I, whole genome shotgun sequence	911500	912500	1.4	0.72	0.68	18.8
NC_026501.1 Neurospora crassa OR74A linkage group I, whole genome shotgun sequence	912000	913000	1.21	0.64	0.57	18.8
NC_026501.1 Neurospora crassa OR74A linkage group I, whole genome shotgun sequence	912500	913500	1.28	0.56	0.72	18.4
NC_026501.1 Neurospora crassa OR74A linkage group I, whole genome shotgun sequence	913000	914000	1.63	0.41	1.22	15.6
NC_026501.1 Neurospora crassa OR74A linkage group I, whole genome shotgun sequence	913500	914500	1.46	0.46	1.01	16.1
NC_026501.1 Neurospora crassa OR74A linkage group I, whole genome shotgun sequence	914000	915000	1.41	0.61	0.8	15.5
NC_026501.1 Neurospora crassa OR74A linkage group I, whole genome shotgun sequence	914500	915500	1.25	0.62	0.62	16.4
NC_026501.1 Neurospora crassa OR74A linkage group I, whole genome shotgun sequence	915000	916000	1.21	0.56	0.65	15.9
NC_026501.1 Neurospora crassa OR74A linkage group I, whole genome shotgun sequence	915500	916500	1.42	0.64	0.78	19.9
NC_026501.1 Neurospora crassa OR74A linkage group I, whole genome shotgun sequence	916000	917000	1.3	0.66	0.64	19.7
NC_026501.1 Neurospora crassa OR74A linkage group I, whole genome shotgun sequence	916500	917500	1.34	0.58	0.76	21.4
NC_026501.1 Neurospora crassa OR74A linkage group I, whole genome shotgun sequence	917000	918000	1.6	0.59	1.01	21.8
NC_026501.1 Neurospora crassa OR74A linkage group I, whole genome shotgun sequence	917500	918500	1.62	0.67	0.95	18.5
NC_026501.1 Neurospora crassa OR74A linkage group I, whole genome shotgun sequence	918000	919000	1.42	0.65	0.78	13.4
NC_026501.1 Neurospora crassa OR74A linkage group I, whole genome shotgun sequence	918500	919500	1.4	0.55	0.85	13.7
NC_026501.1 Neurospora crassa OR74A linkage group I, whole genome shotgun sequence	919000	920000	1.36	0.59	0.78	23.8
NC_026501.1 Neurospora crassa OR74A linkage group I, whole genome shotgun sequence	919500	920500	1.43	0.62	0.81	23.9
NC_026501.1 Neurospora crassa OR74A linkage group I, whole genome shotgun sequence	920000	921000	1.83	0.49	1.34	15.2
NC_026501.1 Neurospora crassa OR74A linkage group I, whole genome shotgun sequence	920500	921500	1.59	0.33	1.26	11
NC_026501.1 Neurospora crassa OR74A linkage group I, whole genome shotgun sequence	921000	922000	1.61	0.3	1.31	9.2
NC_026501.1 Neurospora crassa OR74A linkage group I, whole genome shotgun sequence	921500	922500	1.94	0.11	1.83	9.1
NC_026501.1 Neurospora crassa OR74A linkage group I, whole genome shotgun sequence	922000	923000	1.86	0.08	1.77	7.1
NC_026501.1 Neurospora crassa OR74A linkage group I, whole genome shotgun sequence	922500	923500	1.53	0.17	1.37	5.1
NC_026501.1 Neurospora crassa OR74A linkage group I, whole genome shotgun sequence	923000	924000	1.56	0.23	1.33	8.3
NC_026501.1 Neurospora crassa OR74A linkage group I, whole genome shotgun sequence	923500	924500	1.5	0.33	1.17	7.2
NC_026501.1 Neurospora crassa OR74A linkage group I, whole genome shotgun sequence	924000	925000	1.34	0.8	0.54	19.7
NC_026501.1 Neurospora crassa OR74A linkage group I, whole genome shotgun sequence	924500	925500	1.02	0.98	0.04	43.7
NC_026501.1 Neurospora crassa OR74A linkage group I, whole genome shotgun sequence	925000	926000	0.43	1.31	-0.88	53.4
NC_026501.1 Neurospora crassa OR74A linkage group I, whole genome shotgun sequence	925500	926500	0.29	1.38	-1.09	50.7
NC_026501.1 Neurospora crassa OR74A linkage group I, whole genome shotgun sequence	926000	927000	0.59	1.25	-0.66	45.7
NC_026501.1 Neurospora crassa OR74A linkage group I, whole genome shotgun sequence	926500	927500	0.88	1.11	-0.23	42.6
NC_026501.1 Neurospora crassa OR74A linkage group I, whole genome shotgun sequence	927000	928000	0.9	0.93	-0.03	44.1
NC_026501.1 Neurospora crassa OR74A linkage group I, whole genome shotgun sequence	927500	928500	0.97	0.95	0.02	41.2
NC_026501.1 Neurospora crassa OR74A linkage group I, whole genome shotgun sequence	928000	929000	0.89	1.13	-0.24	36
NC_026501.1 Neurospora crassa OR74A linkage group I, whole genome shotgun sequence	928500	929500	0.62	1.35	-0.73	39.1
NC_026501.1 Neurospora crassa OR74A linkage group I, whole genome shotgun sequence	929000	930000	0.6	1.13	-0.52	47.3
NC_026501.1 Neurospora crassa OR74A linkage group I, whole genome shotgun sequence	929500	930500	0.97	0.89	0.08	52.3
NC_026501.1 Neurospora crassa OR74A linkage group I, whole genome shotgun sequence	930000	931000	0.75	1.02	-0.27	51.3
NC_026501.1 Neurospora crassa OR74A linkage group I, whole genome shotgun sequence	930500	931500	0.49	1.29	-0.8	51.8
NC_026501.1 Neurospora crassa OR74A linkage group I, whole genome shotgun sequence	931000	932000	0.35	1.47	-1.12	51.3
NC_026501.1 Neurospora crassa OR74A linkage group I, whole genome shotgun sequence	931500	932500	0.35	1.41	-1.06	50.3
NC_026501.1 Neurospora crassa OR74A linkage group I, whole genome shotgun sequence	932000	933000	0.53	1.34	-0.81	50.2
NC_026501.1 Neurospora crassa OR74A linkage group I, whole genome shotgun sequence	932500	933500	0.69	1.21	-0.52	48.1
NC_026501.1 Neurospora crassa OR74A linkage group I, whole genome shotgun sequence	933000	934000	0.76	1.27	-0.51	45.6
NC_026501.1 Neurospora crassa OR74A linkage group I, whole genome shotgun sequence	933500	934500	0.73	1.34	-0.61	44.7
NC_026501.1 Neurospora crassa OR74A linkage group I, whole genome shotgun sequence	934000	935000	0.66	1.23	-0.56	46.8
NC_026501.1 Neurospora crassa OR74A linkage group I, whole genome shotgun sequence	934500	935500	0.53	1.28	-0.74	48.7
NC_026501.1 Neurospora crassa OR74A linkage group I, whole genome shotgun sequence	935000	936000	0.56	1.32	-0.76	43.4
NC_026501.1 Neurospora crassa OR74A linkage group I, whole genome shotgun sequence	935500	936500	0.72	1.28	-0.55	42.6
NC_026501.1 Neurospora crassa OR74A linkage group I, whole genome shotgun sequence	936000	937000	0.77	1.12	-0.35	47.9
NC_026501.1 Neurospora crassa OR74A linkage group I, whole genome shotgun sequence	936500	937500	0.65	1.12	-0.47	51.5
NC_026501.1 Neurospora crassa OR74A linkage group I, whole genome shotgun sequence	937000	938000	0.69	1.16	-0.47	51.3
NC_026501.1 Neurospora crassa OR74A linkage group I, whole genome shotgun sequence	937500	938500	0.73	1.17	-0.44	49.5
NC_026501.1 Neurospora crassa OR74A linkage group I, whole genome shotgun sequence	938000	939000	0.67	1.25	-0.59	49.8
NC_026501.1 Neurospora crassa OR74A linkage group I, whole genome shotgun sequence	938500	939500	0.64	1.38	-0.73	50.6
NC_026501.1 Neurospora crassa OR74A linkage group I, whole genome shotgun sequence	939000	940000	0.44	1.39	-0.94	54.6
NC_026501.1 Neurospora crassa OR74A linkage group I, whole genome shotgun sequence	939500	940500	0.37	1.41	-1.04	59.7
NC_026501.1 Neurospora crassa OR74A linkage group I, whole genome shotgun sequence	940000	941000	0.38	1.57	-1.2	62.4
NC_026501.1 Neurospora crassa OR74A linkage group I, whole genome shotgun sequence	940500	941500	0.53	1.18	-0.65	61.3
NC_026501.1 Neurospora crassa OR74A linkage group I, whole genome shotgun sequence	941000	942000	0.89	0.91	-0.02	58.1
NC_026501.1 Neurospora crassa OR74A linkage group I, whole genome shotgun sequence	941500	942500	1.29	0.9	0.39	57
NC_026501.1 Neurospora crassa OR74A linkage group I, whole genome shotgun sequence	942000	943000	1.54	1	0.54	61.4
NC_026501.1 Neurospora crassa OR74A linkage group I, whole genome shotgun sequence	942500	943500	0.71	1.32	-0.61	49.6
NC_026501.1 Neurospora crassa OR74A linkage group I, whole genome shotgun sequence	943000	944000	0.82	1.26	-0.44	33.7
NC_026501.1 Neurospora crassa OR74A linkage group I, whole genome shotgun sequence	943500	944500	0.9	1.15	-0.25	35.9
NC_026501.1 Neurospora crassa OR74A linkage group I, whole genome shotgun sequence	944000	945000	0.89	1.13	-0.24	41.1
NC_026501.1 Neurospora crassa OR74A linkage group I, whole genome shotgun sequence	944500	945500	0.92	1.06	-0.14	38.9
NC_026501.1 Neurospora crassa OR74A linkage group I, whole genome shotgun sequence	945000	946000	0.8	1.27	-0.46	33.5
NC_026501.1 Neurospora crassa OR74A linkage group I, whole genome shotgun sequence	945500	946500	0.74	1.3	-0.56	37.4
NC_026501.1 Neurospora crassa OR74A linkage group I, whole genome shotgun sequence	946000	947000	0.88	0.95	-0.07	43.3
NC_026501.1 Neurospora crassa OR74A linkage group I, whole genome shotgun sequence	946500	947500	0.94	0.89	0.06	45.2
NC_026501.1 Neurospora crassa OR74A linkage group I, whole genome shotgun sequence	947000	948000	0.7	1.17	-0.47	46.4
NC_026501.1 Neurospora crassa OR74A linkage group I, whole genome shotgun sequence	947500	948500	0.58	1.3	-0.71	49.1
NC_026501.1 Neurospora crassa OR74A linkage group I, whole genome shotgun sequence	948000	949000	0.53	1.28	-0.76	49.9
NC_026501.1 Neurospora crassa OR74A linkage group I, whole genome shotgun sequence	948500	949500	0.53	1.27	-0.74	46.3
NC_026501.1 Neurospora crassa OR74A linkage group I, whole genome shotgun sequence	949000	950000	0.68	1.22	-0.54	46.8
NC_026501.1 Neurospora crassa OR74A linkage group I, whole genome shotgun sequence	949500	950500	0.8	1.22	-0.42	50.8
NC_026501.1 Neurospora crassa OR74A linkage group I, whole genome shotgun sequence	950000	951000	0.58	1.34	-0.76	41.2
NC_026501.1 Neurospora crassa OR74A linkage group I, whole genome shotgun sequence	950500	951500	0.61	1.34	-0.73	35.9
NC_026501.1 Neurospora crassa OR74A linkage group I, whole genome shotgun sequence	951000	952000	0.87	1.15	-0.28	43.7
NC_026501.1 Neurospora crassa OR74A linkage group I, whole genome shotgun sequence	951500	952500	0.95	1.04	-0.09	47.1
NC_026501.1 Neurospora crassa OR74A linkage group I, whole genome shotgun sequence	952000	953000	0.94	1	-0.06	45.7
NC_026501.1 Neurospora crassa OR74A linkage group I, whole genome shotgun sequence	952500	953500	0.79	1.16	-0.37	50.2
NC_026501.1 Neurospora crassa OR74A linkage group I, whole genome shotgun sequence	953000	954000	0.53	1.17	-0.64	56.3
NC_026501.1 Neurospora crassa OR74A linkage group I, whole genome shotgun sequence	953500	954500	0.46	1.09	-0.63	55.4
NC_026501.1 Neurospora crassa OR74A linkage group I, whole genome shotgun sequence	954000	955000	0.57	1.19	-0.62	52.8
NC_026501.1 Neurospora crassa OR74A linkage group I, whole genome shotgun sequence	954500	955500	0.65	1.28	-0.63	48.3
NC_026501.1 Neurospora crassa OR74A linkage group I, whole genome shotgun sequence	955000	956000	0.6	1.24	-0.64	51
NC_026501.1 Neurospora crassa OR74A linkage group I, whole genome shotgun sequence	955500	956500	0.54	1.21	-0.67	55
NC_026501.1 Neurospora crassa OR74A linkage group I, whole genome shotgun sequence	956000	957000	0.53	1.17	-0.64	53.1
NC_026501.1 Neurospora crassa OR74A linkage group I, whole genome shotgun sequence	956500	957500	0.69	1.07	-0.38	48.1
NC_026501.1 Neurospora crassa OR74A linkage group I, whole genome shotgun sequence	957000	958000	0.73	1.1	-0.37	36.6
NC_026501.1 Neurospora crassa OR74A linkage group I, whole genome shotgun sequence	957500	958500	0.86	1.17	-0.31	37
NC_026501.1 Neurospora crassa OR74A linkage group I, whole genome shotgun sequence	958000	959000	0.98	1.07	-0.09	46.7
NC_026501.1 Neurospora crassa OR74A linkage group I, whole genome shotgun sequence	958500	959500	0.95	1.04	-0.09	47.4
NC_026501.1 Neurospora crassa OR74A linkage group I, whole genome shotgun sequence	959000	960000	0.91	1.16	-0.24	47
NC_026501.1 Neurospora crassa OR74A linkage group I, whole genome shotgun sequence	959500	960500	0.84	1.16	-0.32	47.2
NC_026501.1 Neurospora crassa OR74A linkage group I, whole genome shotgun sequence	960000	961000	0.77	1.11	-0.34	48
NC_026501.1 Neurospora crassa OR74A linkage group I, whole genome shotgun sequence	960500	961500	0.6	1.16	-0.56	52
NC_026501.1 Neurospora crassa OR74A linkage group I, whole genome shotgun sequence	961000	962000	0.69	1.16	-0.47	51.3
NC_026501.1 Neurospora crassa OR74A linkage group I, whole genome shotgun sequence	961500	962500	0.62	1.27	-0.65	49.7
NC_026501.1 Neurospora crassa OR74A linkage group I, whole genome shotgun sequence	962000	963000	0.44	1.34	-0.9	52.4
NC_026501.1 Neurospora crassa OR74A linkage group I, whole genome shotgun sequence	962500	963500	0.56	1.26	-0.7	51.4
NC_026501.1 Neurospora crassa OR74A linkage group I, whole genome shotgun sequence	963000	964000	0.68	1.24	-0.57	50.7
NC_026501.1 Neurospora crassa OR74A linkage group I, whole genome shotgun sequence	963500	964500	0.79	1.22	-0.43	47.8
NC_026501.1 Neurospora crassa OR74A linkage group I, whole genome shotgun sequence	964000	965000	0.8	1.22	-0.42	46.1
NC_026501.1 Neurospora crassa OR74A linkage group I, whole genome shotgun sequence	964500	965500	0.79	1.19	-0.4	47.7
NC_026501.1 Neurospora crassa OR74A linkage group I, whole genome shotgun sequence	965000	966000	0.85	1.07	-0.21	49.6
NC_026501.1 Neurospora crassa OR74A linkage group I, whole genome shotgun sequence	965500	966500	0.78	1.12	-0.34	52.4
NC_026501.1 Neurospora crassa OR74A linkage group I, whole genome shotgun sequence	966000	967000	0.67	1.25	-0.58	51.1
NC_026501.1 Neurospora crassa OR74A linkage group I, whole genome shotgun sequence	966500	967500	0.66	1.21	-0.55	50.1
NC_026501.1 Neurospora crassa OR74A linkage group I, whole genome shotgun sequence	967000	968000	0.72	1.17	-0.46	46
NC_026501.1 Neurospora crassa OR74A linkage group I, whole genome shotgun sequence	967500	968500	0.6	1.2	-0.59	44.1
NC_026501.1 Neurospora crassa OR74A linkage group I, whole genome shotgun sequence	968000	969000	0.6	1.33	-0.73	44.5
NC_026501.1 Neurospora crassa OR74A linkage group I, whole genome shotgun sequence	968500	969500	0.75	1.27	-0.52	44.1
NC_026501.1 Neurospora crassa OR74A linkage group I, whole genome shotgun sequence	969000	970000	0.67	1.26	-0.59	50.8
NC_026501.1 Neurospora crassa OR74A linkage group I, whole genome shotgun sequence	969500	970500	0.54	1.26	-0.72	53
NC_026501.1 Neurospora crassa OR74A linkage group I, whole genome shotgun sequence	970000	971000	0.52	1.23	-0.71	49.3
NC_026501.1 Neurospora crassa OR74A linkage group I, whole genome shotgun sequence	970500	971500	0.54	1.3	-0.76	49.3
NC_026501.1 Neurospora crassa OR74A linkage group I, whole genome shotgun sequence	971000	972000	0.46	1.45	-0.99	50.8
NC_026501.1 Neurospora crassa OR74A linkage group I, whole genome shotgun sequence	971500	972500	0.32	1.5	-1.18	51.8
NC_026501.1 Neurospora crassa OR74A linkage group I, whole genome shotgun sequence	972000	973000	0.52	1.25	-0.73	51
NC_026501.1 Neurospora crassa OR74A linkage group I, whole genome shotgun sequence	972500	973500	0.74	1.19	-0.45	51.1
NC_026501.1 Neurospora crassa OR74A linkage group I, whole genome shotgun sequence	973000	974000	0.74	1.2	-0.46	50.5
NC_026501.1 Neurospora crassa OR74A linkage group I, whole genome shotgun sequence	973500	974500	0.57	1.27	-0.7	46.6
NC_026501.1 Neurospora crassa OR74A linkage group I, whole genome shotgun sequence	974000	975000	0.61	1.38	-0.77	41
NC_026501.1 Neurospora crassa OR74A linkage group I, whole genome shotgun sequence	974500	975500	0.68	1.28	-0.6	38.3
NC_026501.1 Neurospora crassa OR74A linkage group I, whole genome shotgun sequence	975000	976000	0.59	1.26	-0.67	40.1
NC_026501.1 Neurospora crassa OR74A linkage group I, whole genome shotgun sequence	975500	976500	0.64	1.14	-0.5	42.2
NC_026501.1 Neurospora crassa OR74A linkage group I, whole genome shotgun sequence	976000	977000	0.61	1.16	-0.54	43.3
NC_026501.1 Neurospora crassa OR74A linkage group I, whole genome shotgun sequence	976500	977500	0.57	1.36	-0.79	43.1
NC_026501.1 Neurospora crassa OR74A linkage group I, whole genome shotgun sequence	977000	978000	0.45	1.4	-0.95	48.2
NC_026501.1 Neurospora crassa OR74A linkage group I, whole genome shotgun sequence	977500	978500	0.35	1.34	-0.99	50.4
NC_026501.1 Neurospora crassa OR74A linkage group I, whole genome shotgun sequence	978000	979000	0.37	1.45	-1.08	46.3
NC_026501.1 Neurospora crassa OR74A linkage group I, whole genome shotgun sequence	978500	979500	0.37	1.53	-1.16	48.4
NC_026501.1 Neurospora crassa OR74A linkage group I, whole genome shotgun sequence	979000	980000	0.49	1.27	-0.78	46.6
NC_026501.1 Neurospora crassa OR74A linkage group I, whole genome shotgun sequence	979500	980500	0.57	1.19	-0.62	43.1
NC_026501.1 Neurospora crassa OR74A linkage group I, whole genome shotgun sequence	980000	981000	0.55	1.3	-0.76	44.1
NC_026501.1 Neurospora crassa OR74A linkage group I, whole genome shotgun sequence	980500	981500	0.65	1.29	-0.65	42.1
NC_026501.1 Neurospora crassa OR74A linkage group I, whole genome shotgun sequence	981000	982000	0.62	1.35	-0.73	45.6
NC_026501.1 Neurospora crassa OR74A linkage group I, whole genome shotgun sequence	981500	982500	0.44	1.42	-0.97	50.3
NC_026501.1 Neurospora crassa OR74A linkage group I, whole genome shotgun sequence	982000	983000	0.52	1.32	-0.8	49.2
NC_026501.1 Neurospora crassa OR74A linkage group I, whole genome shotgun sequence	982500	983500	0.46	1.43	-0.97	49
NC_026501.1 Neurospora crassa OR74A linkage group I, whole genome shotgun sequence	983000	984000	0.4	1.62	-1.23	48.7
NC_026501.1 Neurospora crassa OR74A linkage group I, whole genome shotgun sequence	983500	984500	0.62	1.44	-0.81	50.9
NC_026501.1 Neurospora crassa OR74A linkage group I, whole genome shotgun sequence	984000	985000	0.65	1.23	-0.57	51.3
NC_026501.1 Neurospora crassa OR74A linkage group I, whole genome shotgun sequence	984500	985500	0.54	1.19	-0.64	49.1
NC_026501.1 Neurospora crassa OR74A linkage group I, whole genome shotgun sequence	985000	986000	0.53	1.27	-0.73	49.6
NC_026501.1 Neurospora crassa OR74A linkage group I, whole genome shotgun sequence	985500	986500	0.47	1.29	-0.82	50.6
NC_026501.1 Neurospora crassa OR74A linkage group I, whole genome shotgun sequence	986000	987000	0.53	1.12	-0.58	50.8
NC_026501.1 Neurospora crassa OR74A linkage group I, whole genome shotgun sequence	986500	987500	0.54	1.09	-0.55	49
NC_026501.1 Neurospora crassa OR74A linkage group I, whole genome shotgun sequence	987000	988000	0.58	1.24	-0.66	44.2
NC_026501.1 Neurospora crassa OR74A linkage group I, whole genome shotgun sequence	987500	988500	0.87	1.19	-0.31	34.7
NC_026501.1 Neurospora crassa OR74A linkage group I, whole genome shotgun sequence	988000	989000	0.79	1.13	-0.34	37.1
NC_026501.1 Neurospora crassa OR74A linkage group I, whole genome shotgun sequence	988500	989500	0.59	1.13	-0.54	45.1
NC_026501.1 Neurospora crassa OR74A linkage group I, whole genome shotgun sequence	989000	990000	0.53	1.3	-0.77	46.3
NC_026501.1 Neurospora crassa OR74A linkage group I, whole genome shotgun sequence	989500	990500	0.42	1.51	-1.09	48.5
NC_026501.1 Neurospora crassa OR74A linkage group I, whole genome shotgun sequence	990000	991000	0.41	1.36	-0.95	51.1
NC_026501.1 Neurospora crassa OR74A linkage group I, whole genome shotgun sequence	990500	991500	0.41	1.3	-0.89	49.4
NC_026501.1 Neurospora crassa OR74A linkage group I, whole genome shotgun sequence	991000	992000	0.5	1.25	-0.75	47.8
NC_026501.1 Neurospora crassa OR74A linkage group I, whole genome shotgun sequence	991500	992500	0.61	1.16	-0.54	50.6
NC_026501.1 Neurospora crassa OR74A linkage group I, whole genome shotgun sequence	992000	993000	0.6	1.11	-0.51	43.7
NC_026501.1 Neurospora crassa OR74A linkage group I, whole genome shotgun sequence	992500	993500	0.76	1.17	-0.42	42.9
NC_026501.1 Neurospora crassa OR74A linkage group I, whole genome shotgun sequence	993000	994000	0.71	1.22	-0.5	48.3
NC_026501.1 Neurospora crassa OR74A linkage group I, whole genome shotgun sequence	993500	994500	0.68	1.23	-0.55	44.4
NC_026501.1 Neurospora crassa OR74A linkage group I, whole genome shotgun sequence	994000	995000	0.68	1.19	-0.51	42.1
NC_026501.1 Neurospora crassa OR74A linkage group I, whole genome shotgun sequence	994500	995500	0.74	1.12	-0.39	40.8
NC_026501.1 Neurospora crassa OR74A linkage group I, whole genome shotgun sequence	995000	996000	0.75	1.19	-0.45	43.1
NC_026501.1 Neurospora crassa OR74A linkage group I, whole genome shotgun sequence	995500	996500	0.56	1.37	-0.82	50.5
NC_026501.1 Neurospora crassa OR74A linkage group I, whole genome shotgun sequence	996000	997000	0.45	1.28	-0.83	53.1
NC_026501.1 Neurospora crassa OR74A linkage group I, whole genome shotgun sequence	996500	997500	0.34	1.33	-0.99	53.5
NC_026501.1 Neurospora crassa OR74A linkage group I, whole genome shotgun sequence	997000	998000	0.34	1.4	-1.06	58
NC_026501.1 Neurospora crassa OR74A linkage group I, whole genome shotgun sequence	997500	998500	0.69	1.16	-0.47	54.6
NC_026501.1 Neurospora crassa OR74A linkage group I, whole genome shotgun sequence	998000	999000	0.81	1.12	-0.3	52.5
[truncated: 80,090 more rows]
