# Supplementary material for: The RIPper, a web-based tool for genome-wide quantification of Repeat-Induced Point (RIP) mutations
Source: PeerJ. 2019 Aug 26;7:e7447. doi: 10.7717/peerj.7447 (PMC6714961; doi:10.7717/peerj.7447)
Supplement: Table S3 — Values highlighted in blue indicate a larger proportion of the overall recorded genome-wide RIP of negative control organisms, due to less stringent RIP substrate index value parameters. [file peerj-07-7447-s004.xlsx]

## Sheet: Sheet1
Supplementary Tables S2: Genome-wide RIP statistics of control organisms investigated using different RIP index cut-off values.
Values highlighted in blue indicate a larger proportion of the overall recorded genome-wide RIP of negative control organisms, due to less stringent RIP substrate index value parameters.
RIP product index value	RIP substrate index value	Total number of windows investigated	GC Content of Genome Assembly (%)	Number of RIP Affected Windows	Total estimated genome-wide RIP (%)1	Number of LRARs	Average Size of LRARs (bp)	Average GC Content of LRARs (%)	Sum of all LRARs (bp)	RIP product index3 average for LRARs	RIP substrate index4 average for LRARs	RIP composite index5 average for LRARs
Escherichia coli
1.1	0.75	9283	50.79	0	0	0	0	0	0	0	0	0
	0.8	9283	50.79	1	0.01	0	0	0	0	0	0	0
	0.85	9283	50.79	3	0.03	0	0	0	0	0	0	0
	0.9	9283	50.79	12	0.13	0	0	0	0	0	0	0
1.15	0.75	9283	50.79	0	0	0	0	0	0	0	0	0
	0.8	9283	50.79	1	0.01	0	0	0	0	0	0	0
	0.85	9283	50.79	3	0.03	0	0	0	0	0	0	0
	0.9	9283	50.79	9	0.1	0	0	0	0	0	0	0
1.2	0.75	9283	50.79	0	0	0	0	0	0	0	0	0
	0.8	9283	50.79	1	0.01	0	0	0	0	0	0	0
	0.85	9283	50.79	2	0.02	0	0	0	0	0	0	0
	0.9	9283	50.79	6	0.06	0	0	0	0	0	0	0
1.25	0.75	9283	50.79	0	0	0	0	0	0	0	0	0
	0.8	9283	50.79	1	0.01	0	0	0	0	0	0	0
	0.85	9283	50.79	2	0.02	0	0	0	0	0	0	0
	0.9	9283	50.79	6	0.06	0	0	0	0	0	0	0
Candida albicans
1.1	0.75	28565	33.44	1	0	0	0	0	0	0	0	0
	0.8	28565	33.44	6	0.02	0	0	0	0	0	0	0
	0.85	28565	33.44	33	0.12	0	0	0	0	0	0	0
	0.9	28565	33.44	45	0.16	0	0	0	0	0	0	0
1.15	0.75	28565	33.44	0	0	0	0	0	0	0	0	0
	0.8	28565	33.44	1	0	0	0	0	0	0	0	0
	0.85	28565	33.44	12	0.04	0	0	0	0	0	0	0
	0.9	28565	33.44	28	0.1	0	0	0	0	0	0	0
1.2	0.75	28565	33.44	0	0	0	0	0	0	0	0	0
	0.8	28565	33.44	1	0	0	0	0	0	0	0	0
	0.85	28565	33.44	10	0.04	0	0	0	0	0	0	0
	0.9	28565	33.44	17	0.06	0	0	0	0	0	0	0
1.25	0.75	28565	33.44	0	0	0	0	0	0	0	0	0
	0.8	28565	33.44	0	0	0	0	0	0	0	0	0
	0.85	28565	33.44	2	0.01	0	0	0	0	0	0	0
	0.9	28565	33.44	6	0.02	0	0	0	0	0	0	0
Encephalitozoon cuniculi
1.1	0.75	4995	43.51	1	0.02	0	0	0	0	0	0	0
	0.8	4995	43.51	2	0.04	0	0	0	0	0	0	0
	0.85	4995	43.51	3	0.06	0	0	0	0	0	0	0
	0.9	4995	43.51	4	0.08	0	0	0	0	0	0	0
1.15	0.75	4995	43.51	1	0.02	0	0	0	0	0	0	0
	0.8	4995	43.51	2	0.04	0	0	0	0	0	0	0
	0.85	4995	43.51	3	0.06	0	0	0	0	0	0	0
	0.9	4995	43.51	3	0.06	0	0	0	0	0	0	0
1.2	0.75	4995	43.51	1	0.02	0	0	0	0	0	0	0
	0.8	4995	43.51	2	0.04	0	0	0	0	0	0	0
	0.85	4995	43.51	3	0.06	0	0	0	0	0	0	0
	0.9	4995	43.51	3	0.06	0	0	0	0	0	0	0
1.25	0.75	4995	43.51	1	0.02	0	0	0	0	0	0	0
	0.8	4995	43.51	2	0.04	0	0	0	0	0	0	0
	0.85	4995	43.51	3	0.06	0	0	0	0	0	0	0
	0.9	4995	43.51	3	0.06	0	0	0	0	0	0	0
Neurospora crassa
1.1	0.75	82204	43.34	12545	15.26	439	13279.1	16.04	5829515	1.59	0.44	1.14
	0.8	82204	43.34	12855	15.64	403	14862.3	16.23	5989515	1.59	0.46	1.13
	0.85	82204	43.34	13130	15.97	369	16586.8	16.34	6120515	1.58	0.47	1.11
	0.9	82204	43.34	13453	16.36	359	17363.5	16.68	6233515	1.57	0.48	1.09
1.15	0.75	82204	43.34	12468	15.17	452	12683.7	15.95	5733015	1.59	0.44	1.15
	0.8	82204	43.34	12763	15.52	423	14042.6	16.19	5940015	1.59	0.46	1.13
	0.85	82204	43.34	13010	15.82	401	15165.9	16.28	6081515	1.58	0.47	1.12
	0.9	82204	43.34	13268	16.14	392	15753.9	16.54	6175515	1.58	0.48	1.1
1.2	0.75	82204	43.34	12296	14.96	481	11502.1	15.75	5532515	1.6	0.44	1.16
	0.8	82204	43.34	12564	15.28	465	12360.2	16.01	5747515	1.59	0.45	1.14
	0.85	82204	43.34	12786	15.55	456	12920	16.15	5891515	1.59	0.46	1.13
	0.9	82204	43.34	12996	15.81	451	13252.8	16.36	5977015	1.58	0.47	1.11
1.25	0.75	82204	43.34	12001	14.6	489	10584.9	15.63	5176015	1.61	0.43	1.19
	0.8	82204	43.34	12230	14.88	494	10965.6	15.96	5417015	1.61	0.44	1.17
	0.85	82204	43.34	12407	15.09	496	11180.5	16.09	5545515	1.6	0.45	1.15
	0.9	82204	43.34	12571	15.29	492	11400.4	16.25	5609015	1.6	0.46	1.14
Leptosphariae maculans
1.1	0.75	86853	35.79	10248	11.78	275	7490.52	14.91	2059893	2.09	0.48	1.61
	0.8	86853	35.79	11056	12.71	295	7793.22	14.88	2298999	2.06	0.5	1.56
	0.85	86853	35.79	11771	13.53	308	7956.02	14.67	2450455	2.05	0.52	1.53
	0.9	86853	35.79	12467	14.33	319	8074.39	14.4	2575732	2.02	0.53	1.49
1.15	0.75	86853	35.79	10225	11.75	275	7490.52	14.91	2059893	2.09	0.48	1.61
	0.8	86853	35.79	11028	12.68	295	7791.52	14.88	2298499	2.06	0.5	1.56
	0.85	86853	35.79	11727	13.48	308	7947.91	14.68	2447955	2.05	0.52	1.53
	0.9	86853	35.79	12399	14.25	319	8064.99	14.41	2572732	2.02	0.53	1.49
1.2	0.75	86853	35.79	10210	11.74	275	7477.79	14.93	2056393	2.09	0.48	1.61
	0.8	86853	35.79	11001	12.65	294	7789.11	14.87	2289999	2.06	0.5	1.56
	0.85	86853	35.79	11672	13.42	306	7950.83	14.69	2432955	2.05	0.52	1.53
	0.9	86853	35.79	12303	14.14	318	8054.72	14.41	2561402	2.03	0.53	1.5
1.25	0.75	86853	35.79	10170	11.69	274	7477.71	14.99	2048893	2.09	0.48	1.61
	0.8	86853	35.79	10945	12.58	293	7790.1	14.92	2282499	2.06	0.5	1.56
	0.85	86853	35.79	11589	13.32	305	7952.31	14.74	2425455	2.05	0.52	1.53
	0.9	86853	35.79	12194	14.02	316	8059.82	14.49	2546902	2.03	0.53	1.5
Trichoderma reesei
1.1	0.75	69845	45.25	4567	6.54	179	10662	6.04	1908500	2.37	0.27	2.1
	0.8	69845	45.25	4668	6.68	176	11190.3	6.16	1969500	2.36	0.28	2.07
	0.85	69845	45.25	4758	6.81	172	11648.3	6.13	2003500	2.36	0.29	2.07
	0.9	69845	45.25	4860	6.96	167	12224.5	6.21	2041500	2.35	0.3	2.04
1.15	0.75	69845	45.25	4566	6.54	179	10662	6.04	1908500	2.37	0.27	2.1
	0.8	69845	45.25	4665	6.68	176	11190.3	6.16	1969500	2.36	0.28	2.07
	0.85	69845	45.25	4755	6.81	172	11648.3	6.13	2003500	2.36	0.29	2.07
	0.9	69845	45.25	4851	6.95	167	12224.5	6.21	2041500	2.35	0.3	2.04
1.2	0.75	69845	45.25	4565	6.54	179	10662	6.04	1908500	2.37	0.27	2.1
	0.8	69845	45.25	4664	6.68	176	11190.3	6.16	1969500	2.36	0.28	2.07
	0.85	69845	45.25	4754	6.81	172	11648.3	6.13	2003500	2.36	0.29	2.07
	0.9	69845	45.25	4847	6.94	167	12221.6	6.18	2041000	2.35	0.3	2.05
1.25	0.75	69845	45.25	4562	6.53	180	10580.6	6.02	1904500	2.37	0.27	2.1
	0.8	69845	45.25	4661	6.67	177	11104.5	6.14	1965500	2.36	0.28	2.08
	0.85	69845	45.25	4750	6.8	173	11554.9	6.1	1999000	2.36	0.29	2.07
	0.9	69845	45.25	4842	6.93	168	12122	6.16	2036500	2.35	0.3	2.05
1 Proportion of the genome affected by RIP. Calculated using the total number of windows indicating RIP-positive index values against the total number of windows investigated for the entire genome sequence.
2 LRAR= Large RIP affected genomic regions. More than 4 000bp that are consecutively RIP affected.
3 Product Index Value [TpA/ ApT].
4 Substrate Index Value [CpA +TpG/ ApC + GpT].
5 Composite Index Value [(TpA/ ApT) – (CpA + TpG/ ApC + GpT)].
